# Supplementary material for: How can equitable video visit access be delivered in primary care? A qualitative study among rural primary care teams and patients
Source: PubMed Central journal article supplement — BMJ Open. 2022 Aug 4;12(8):e062261. doi: 10.1136/bmjopen-2022-062261 (PMC9361743; doi:10.1136/bmjopen-2022-062261), 2022-08-04
Supplement: bmjopen-2022-062261.draft_revisions.pdf [file bmjopen-2022-062261.draft_revisions.pdf]

# BMJ Open

BMJ Open is committed to open peer review. As part of this commitment we make the peer review history of every article we publish publicly available.

When an article is published we post the peer reviewers' comments and the authors' responses online. We also post the versions of the paper that were used during peer review. These are the versions that the peer review comments apply to.

The versions of the paper that follow are the versions that were submitted during the peer review process. They are not the versions of record or the final published versions. They should not be cited or distributed as the published version of this manuscript.

BMJ Open is an open access journal and the full, final, typeset and author-corrected version of record of the manuscript is available on our site with no access controls, subscription charges or pay-per-view fees (<http://bmjopen.bmj.com>).

If you have any questions on BMJ Open's open peer review process please email [info.bmjopen@bmj.com](mailto:info.bmjopen@bmj.com)

# BMJ Open

## Pursuing Equitable Video Visit Access: A Clinical Algorithm Informed by Qualitative Data Collection from Clinical Teams and Patients

|                               |                                                                                                                                                                                                                                                                                                                                                                                                                                                                                                                                                                                                                                                                |
|-------------------------------|----------------------------------------------------------------------------------------------------------------------------------------------------------------------------------------------------------------------------------------------------------------------------------------------------------------------------------------------------------------------------------------------------------------------------------------------------------------------------------------------------------------------------------------------------------------------------------------------------------------------------------------------------------------|
| Journal:                      | <i>BMJ Open</i>                                                                                                                                                                                                                                                                                                                                                                                                                                                                                                                                                                                                                                                |
| Manuscript ID                 | bmjopen-2022-062261                                                                                                                                                                                                                                                                                                                                                                                                                                                                                                                                                                                                                                            |
| Article Type:                 | Original research                                                                                                                                                                                                                                                                                                                                                                                                                                                                                                                                                                                                                                              |
| Date Submitted by the Author: | 25-Mar-2022                                                                                                                                                                                                                                                                                                                                                                                                                                                                                                                                                                                                                                                    |
| Complete List of Authors:     | Goldstein, Karen M.; Durham VA Health Care System; Duke University School of Medicine<br>Goldstein, Karen; Duke University,<br>Perry, Kathleen R.; Vagelos College of Physicians & Surgeons<br>Lewinski, Allison ; Duke University<br>Walsh, Conor; Durham VA Health Care System; Duke University School of Medicine<br>Shepherd-Banigan, Megan E.; Durham Vet Affairs Med Ctr<br>Bosworth, HB; Duke University<br>Weidenbacher, Hollis; Durham VA Health Care System<br>Blalock, Dan ; Duke University,<br>Zullig, Leah; Durham Veterans Affairs Medical Center, Center for Health Services Research in Primary Care; Duke University, Department of Medicine |
| Keywords:                     | PRIMARY CARE, Telemedicine < BIOTECHNOLOGY & BIOINFORMATICS, GENERAL MEDICINE (see Internal Medicine)                                                                                                                                                                                                                                                                                                                                                                                                                                                                                                                                                          |
|                               |                                                                                                                                                                                                                                                                                                                                                                                                                                                                                                                                                                                                                                                                |

SCHOLARONE™  
Manuscripts

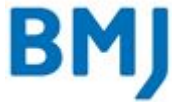

I, the Submitting Author has the right to grant and does grant on behalf of all authors of the Work (as defined in the below author licence), an exclusive licence and/or a non-exclusive licence for contributions from authors who are: i) UK Crown employees; ii) where BMJ has agreed a CC-BY licence shall apply, and/or iii) in accordance with the terms applicable for US Federal Government officers or employees acting as part of their official duties; on a worldwide, perpetual, irrevocable, royalty-free basis to BMJ Publishing Group Ltd ("BMJ") its licensees and where the relevant Journal is co-owned by BMJ to the co-owners of the Journal, to publish the Work in this journal and any other BMJ products and to exploit all rights, as set out in our [licence](#).

The Submitting Author accepts and understands that any supply made under these terms is made by BMJ to the Submitting Author unless you are acting as an employee on behalf of your employer or a postgraduate student of an affiliated institution which is paying any applicable article publishing charge ("APC") for Open Access articles. Where the Submitting Author wishes to make the Work available on an Open Access basis (and intends to pay the relevant APC), the terms of reuse of such Open Access shall be governed by a Creative Commons licence – details of these licences and which [Creative Commons](#) licence will apply to this Work are set out in our licence referred to above.

Other than as permitted in any relevant BMJ Author's Self Archiving Policies, I confirm this Work has not been accepted for publication elsewhere, is not being considered for publication elsewhere and does not duplicate material already published. I confirm all authors consent to publication of this Work and authorise the granting of this licence.

1  
2  
3 **Title:** Pursuing Equitable Video Visit Access: A Clinical Algorithm Informed by  
4 Qualitative Data Collection from Clinical Teams and Patients  
5

6 **Running Title:** Clinical algorithm for video visit access  
7

8  
9 **Authors:** Karen M. Goldstein MD MSPH<sup>1,2</sup>, Kathleen R. Perry MS MDiv<sup>3</sup>, Allison  
10 Lewinski Ph.D.<sup>1,4</sup>, Conor Walsh MD <sup>1,2</sup>, Megan Shepherd-Banigan PhD<sup>1,5-6</sup>, Hayden B.  
11 Bosworth Ph.D. <sup>1,2,4-5, 7</sup>, Hollis Weidenbacher Ph.D.<sup>1</sup>, Dan V. Blalock Ph.D.<sup>1,7</sup>, Leah L.  
12 Zullig<sup>1,5</sup>  
13  
14  
15  
16  
17  
18

- 19 1. Center of Innovation to Accelerate Discovery and Practice Transformation, Durham VA  
20 Health Care System
- 21 2. Division of General Internal Medicine, Duke University School of Medicine, Durham, NC
- 22 3. Columbia University, Vagelos College of Physicians & Surgeons, 630 W 168th St, New  
23 York, NY 10032
- 24 4. Duke University, School of Nursing
- 25 5. Duke University, Department of Population Health Sciences, 215 Morris Street, Durham,  
26 NC, 27701, USA
- 27 6. Duke-Margolis Center for Health Policy, 100 Fuqua Drive, Box 90120  
28 Durham, NC 27708, USA
- 29 7. Duke University, Department of Psychiatry and Behavioral Sciences  
30

31  
32 **Corresponding Author:**  
33

34 Karen M. Goldstein MD, MSPH  
35 508 Fulton Street  
36 Durham, NC 27705  
37 919.286.0411 ext 177764  
38 [Karen.goldstein@va.gov](mailto:Karen.goldstein@va.gov)  
39  
40

41 **Key Words:** virtual care, primary care, telemedicine, racial disparities, rural disparities  
42  
43

44 **Word Count:** 2993  
45  
46  
47  
48  
49  
50  
51  
52  
53  
54  
55  
56  
57  
58  
59  
60

**Abstract:**

**Objective:** The COVID-19 pandemic sparked exponential growth in video visit use in primary care. The rapid shift to virtual from in-person care uncovered concerns about exacerbations of digital access disparities across racial groups and rural populations. Moving forward, it is critical to understand when and how to incorporate video visits equitably into primary care. We sought to develop a novel clinical algorithm to guide primary care clinics on when and to employ video visits as part of care delivery.

**Setting:** 3 rural primary care clinics

**Participants:** 24 Black veterans living in rural areas and 3 primary care teams caring for Black veterans living in rural areas

**Primary and secondary outcome measures:** Findings from semi-structured interviews with patients and focus groups with primary care teams.

**Results:** Key issues around appropriate use of video visits for clinical teams included having adequate technical support, encouraging engagement during video visits, and using video visits for appropriate clinical situations. Patients reported challenges with broadband access, inadequate equipment, concerns about the quality of video care, the importance of visit modality choice, and preferences for in-person care experience over virtual care. We developed an algorithm that requires input from both patients and their care team to assess fit for each clinical encounter.

**Conclusions:** Informed matching of patients and clinical situations to the right visit modality, along with individual patient technology support could reduce virtual access disparities.

1  
2  
3 **Trial registration:** NA  
4  
5  
6

7 **Article Summary**  
8

9 **Strengths and Limitations of the study:**  
10

- 11 1. Primary qualitative data collection from patients and care providers in the same  
12 clinical catchment area.
- 13 2. Data collection centered on a historically under-resourced population to promote  
14 equitable clinical algorithm development.
- 15 3. Stakeholder engagement in data collection tool development.
- 16 4. Iterative development of clinical algorithm rooted in current clinical practice to  
17 facilitate readiness for implementation.  
18  
19  
20  
21  
22  
23  
24  
25  
26  
27  
28  
29  
30  
31  
32  
33  
34  
35  
36  
37  
38  
39  
40  
41  
42  
43  
44  
45  
46  
47  
48  
49  
50  
51  
52  
53  
54  
55  
56  
57  
58  
59  
60

## Introduction

The optimal role of video visits within primary care is undefined. With the onset of COVID-19, the need to stem potential viral transmission led to dramatic and rapid shifts from in-person to virtually-delivered care including video-based care. Video offers assessment and communication advantages not possible with phone alone (e.g., visualizing a rash), may support better patient-provider rapport building [1], and receives higher remuneration from private insurers [2]. However, video-based care comes with distinct challenges for clinical teams (e.g., new clinic workflow) and patients (e.g., device access, technical literacy). In the absence of clear evidence, there is an urgent need to identify the right telehealth modality for the right clinical problem for the right patient at the right time [3].

Finding the optimal role for virtual primary care is particularly critical for historically marginalized and under-resourced populations. While telephone-delivered care may increase access to care[4], early findings show that when compared to phone-based care, systemically disadvantaged populations (e.g. older adults, those in rural or low bandwidth areas, racial and ethnic minorities, unhoused individuals) are less likely to engage in video visits [5, 6]. Compared to phone, access disparities were more pronounced with video visits due to requirements for digital literacy, higher cost, camera-ready phones or computers, and access to adequate bandwidth [5, 7-10].

These findings underscore the structural determinants of telehealth access disparities, including structural racism and unequal access to internet access [11, 12]. Addressing inequitable engagement in virtual care and related access disparities requires action at multiple levels from national policy to individual clinic practices.

1  
2  
3 Our objective was to develop a clinical algorithm to guide when and how to incorporate  
4 video visits into primary care delivery. For this algorithm to support equitable video visit  
5 access, we focused our data collection on patients who have historically experienced  
6 systemic healthcare access limitations. As the largest provider of US primary care and a  
7 national telehealth leader, the Department of Veterans Affairs Health Care System (VA)  
8 is an optimal setting to examine how to optimize virtual care delivery. Thus, we engaged  
9 populations at increased risk for low video uptake, specifically rural, Black veterans [6,  
10 8, 13]  
11  
12  
13  
14  
15  
16  
17  
18  
19  
20  
21

## 22 **Materials and Methods**

23  
24  
25 Data collection occurred among patients and clinical team members of VA outpatient  
26 primary care clinics in [redacted] which serve large populations of rural dwelling  
27 individuals. All study activities were reviewed and approved by the Durham VA Health  
28 Care System Institutional Review Board (IRB #02312). We followed COREQ guidelines  
29 for reporting of qualitative research where applicable[14].  
30  
31  
32  
33  
34  
35  
36

37 Framework: We anchored our approach on the conceptualization of access developed  
38 by Fortney and colleagues [15]. This model emphasizes actual and perceived access to  
39 virtual and in-person care and guided our data collection materials (e.g., interview  
40 guides, matrix analysis, structured note templates), eligibility criteria (e.g., users, non-  
41 users), and debriefing sessions among the research team.  
42  
43  
44  
45  
46  
47  
48

49 Setting: We defined rurality using Rural-Urban Communicating Areas (RUCA)  
50 consistent with the VA Office of Rural Health [16]. At the time of data collection, all  
51 clinics were providing in-person, telephone-based, and video-based care, though virtual  
52  
53  
54  
55  
56  
57  
58  
59  
60



1  
2  
3 care, including video-based care, was encouraged across the VA health care system  
4  
5 due to the pandemic [17].  
6  
7

8 Patients: We conducted semi-structured interviews with veterans identified as Black in  
9  
10 the electronic health record, who were engaged in VA health care (i.e.,  $\geq 1$  primary care  
11  
12 visits within the prior 12 months) and lived in rural areas. Recruitment was stratified by  
13  
14 patients who had completed at least one video-based primary care encounter and those  
15  
16 who had not. The research team contacted potential participants via mailed letter and  
17  
18 then phone. We obtained verbal consent.  
19  
20  
21

22  
23 All interviews were conducted and recorded via WebEx (audio-only) between February-  
24  
25 May 2021 by a study team member (KP) who identifies as white and has training in  
26  
27 qualitative methodology. The interviewer listened to audio recordings and took  
28  
29 templated notes. To ensure reliability and validity, a second study team member (AL,  
30  
31 KG, LZ, MSB, CW) independently listened to interviews, reviewed, and amended  
32  
33 interviewer notes. Responses to each domain were summarized using matrix analysis  
34  
35 for participants stratified by previous video visit experience. Summary responses were  
36  
37 generated independently by two team members and reviewed by a third reviewer.  
38  
39  
40  
41

42 Patient and Public Involvement: The driving question for this project was developed in  
43  
44 response to trends in patient utilization of video-based care and the need to obtain  
45  
46 patient preferences and experiences directly from the patients themselves. We received  
47  
48 consultation on our approach from the [redacted] Veteran Engagement Panel and the  
49  
50 [redacted] Antiracism and Black Equity Advisory Board, however, patients were not  
51  
52 directly involved in the conduct of this work.  
53  
54  
55  
56  
57  
58  
59  
60

1  
2  
3 Primary Care Teams: We invited all primary care team members from 4 VA primary  
4 care clinics serving [redacted] to participate in clinic specific focus groups. We  
5 conducted focus groups between December 2020 and February 2021 using WebEx  
6 video-conferencing platform. Participants were encouraged to turn on their cameras if  
7 available and to make use of the chat function. The same team member conducted  
8 patient interviews and provider focus groups. Focus groups were first given the  
9 opportunity to review and provide feedback on a process map [18], or explicit step-by-  
10 step illustrative flow diagram of a proposed approach to the incorporation of video-visits  
11 into primary care based on existing workflow in our institution (see Appendix 1).  
12 Discussions followed the focus group guide. Research team members (n=3) took notes  
13 during focus groups using structured templates. A rapid qualitative approach and matrix  
14 method were used to identify focus group themes [19-21]. Notes from the structured  
15 templates were consolidated into matrices consistent with Fortney model domains. This  
16 matrix analysis approach was paired with real-time iterative team-based analysis [22]. A  
17 subgroup of team members (KP, KG, CW, AL, MSB, LZ) met virtually during data  
18 collection to review domain level findings and identify implications for primary care  
19 video-based care delivery.  
20  
21  
22  
23  
24  
25  
26  
27  
28  
29  
30  
31  
32  
33  
34  
35  
36  
37  
38  
39  
40  
41  
42

43 Virtual care algorithm generation: We based the initial algorithm structure on our  
44 proposed process map of virtual care incorporation into primary care workflow  
45 (Appendix 1) and standards for clinical algorithm development [23]. Working from the  
46 patient interviews and clinical team focus group findings, we then combined themes with  
47 direct implications for when and how to incorporate video-based visits into primary care  
48 delivery (see Figure 1). For example, we added guidance on when in-person care could  
49  
50  
51  
52  
53  
54  
55  
56  
57  
58  
59  
60

be preferable over video visits. Our research team iteratively revised the algorithm and offered clinical team focus group participants the opportunity to review it. Ultimately, our novel algorithm seeks to guide choice of video or an in-person care should be offered to a specific patient with a given clinical situation and informed by their existing technical skills and equipment.

## Results

We conducted four video-based focus groups across three clinics. Focus group participants included physicians, advanced-practice providers, administrative staff members, and nurses within 3 rural VA primary care clinics (n=38). We conducted 26 individual patient interviews with Black veterans; 14 among individuals with a prior video-based visit and 12 without. Eleven of the 24 individuals who had video visit experience reported receiving help to participate in the visit (Table 1).

**Table 1. Characteristics of Patients Participating in Semi-structured Interviews**

|                              | Prior Video Visit<br>N = 14 | No Prior Video Visit<br>N = 12 |
|------------------------------|-----------------------------|--------------------------------|
| Age, mean (SD)               | 64.50 (SD 9.00)             | 69.08 (8.69)                   |
| Gender*                      |                             |                                |
| Male                         | 11                          | 12                             |
| Female                       | 3                           | -                              |
| Tech self-efficacy †         | Mean=4                      | Mean=4.291667                  |
| <3                           | 2                           | 2                              |
| 3-5                          | 12                          | 9                              |
| VA primary healthcare source |                             |                                |
| Yes                          | 11                          | 11                             |
| No                           | -                           | 1                              |
| Not sure                     | 3                           | 1                              |
| Distance to closest VA       |                             |                                |
| 0-20 miles                   | 4                           | 5                              |
| 21-80 miles                  | 9                           | 6                              |
| missing                      | 1                           | 1                              |
| No. prior video visits       |                             |                                |
| 0 visits                     | -                           | 12                             |

|                                                                                                                          |                      |                      |
|--------------------------------------------------------------------------------------------------------------------------|----------------------|----------------------|
| 1 visit                                                                                                                  | 2                    | -                    |
| 2-10 visits                                                                                                              | 7                    | -                    |
| >10 visits                                                                                                               | 5                    | -                    |
| No. prior telephone visits                                                                                               |                      |                      |
| 0 visits                                                                                                                 | 2                    | 2                    |
| 1 visit                                                                                                                  | -                    | -                    |
| 2-10 visits                                                                                                              | 7                    | 10                   |
| >10 visits                                                                                                               | 5                    | -                    |
| Received help for video visit                                                                                            |                      |                      |
| Yes                                                                                                                      | 11                   | 1                    |
| No                                                                                                                       | 2                    | 10                   |
| Not sure                                                                                                                 | 1                    | 1                    |
| Device used for video visit                                                                                              |                      |                      |
| iPhone                                                                                                                   | 5                    | -                    |
| Android phone                                                                                                            | 5                    | -                    |
| Tablet                                                                                                                   | 2                    | -                    |
| Laptop or computer                                                                                                       | 2                    | -                    |
| Don't have any devices to use                                                                                            | 0                    | -                    |
| Reliable broadband                                                                                                       |                      |                      |
| Yes                                                                                                                      | 11                   | 6                    |
| No                                                                                                                       | 1                    | 5                    |
| Not sure                                                                                                                 | 2                    | 1                    |
| Reliable device                                                                                                          |                      |                      |
| Yes                                                                                                                      | 12                   | 9                    |
| No                                                                                                                       | 2                    | 2                    |
| Not sure                                                                                                                 | 0                    | 1                    |
| Racism in health care (M across items, SD, # of respondents) ‡                                                           | 2.80 (1.17) for n=11 | 3.02 (0.72) for n=10 |
| Endorsed Agreement with:                                                                                                 |                      |                      |
| RHC 1: Doctors treat African American and White people the same. (N, %, # respondents)                                   | 2 (18.2%) of 11      | 7 (58.3%) of 12      |
| RHC 2: Racial discrimination in telehealth is common. (N, %, # respondents)                                              | 6 (50.0%) of 12      | 5 (50.0%) of 10      |
| RHC 3: In most hospitals, African American and Whites receive the same kind of telehealth care. (N, %, # respondents)    | 5 (41.6%) of 12      | 4 (36.4%) of 11      |
| RHC 4: African Americans can receive the telehealth care they want as equally as White people can. (N, %, # respondents) | 5 (38.5%) of 13      | 4 (36.4%) of 11      |
| Personal discrimination scale (M across items, SD) §                                                                     |                      |                      |
| Endorsed Experiencing:                                                                                                   |                      |                      |
| PDS 1: Treated with less courtesy than other people? (N, %, # respondents)                                               | 10 (71.4%) of 14     | 6 (60.0%) of 10      |
| PDS 2: Treated with less respect than other people? (N, %, # respondents)                                                | 11 (78.6%) of 14     | 7 (70.0%) of 10      |
| PDS 3: Received poorer services than other people? (N, %, # respondents)                                                 | 9 (69.2%) of 13      | 7 (70.0%) of 10      |

|                                                                                                     |                      |                     |
|-----------------------------------------------------------------------------------------------------|----------------------|---------------------|
| PDS 4: Had a doctor or nurse act as if he or she thinks you were not smart? (N, %, # respondents)   | 6 (42.9%) of 14      | 3 (30.0%) of 10     |
| PDS 5: Had a doctor or nurse act as if he or she was afraid of you? (N, %, # respondents)           | 4 (28.6%) of 14      | 5 (50.0%) of 10     |
| PDS 6: Had a doctor or nurse act as if he or she was better than you? (N, %, # respondents)         | 9 (64.3%) of 14      | 5 (55.6%) of 9      |
| PDS 7: Felt like a doctor or nurse was not listening to what you were saying? (N, %, # respondents) | 11 (78.6%) of 14     | 7 (70.0%) of 10     |
| Telehealth satisfaction scale (M across items, SD, # of respondents)                                | 1.83 (0.49) for n=13 | 2.02 (0.19) for n=9 |

\*as identified in chart

† Measure by response to the following question: How confident are you that you can complete the steps necessary that you identified above to attend a video visit with your provider on a scale of 1-5? One participant in the No prior Video Visit group did not provide an answer for this question.

‡ Racism in Healthcare measure (Hausmann et al[35]) agreement defined as marking “agree” or “strongly agree.” Average score computed with item 2 reverse coded; range of possible score by question 1-5 with 1 = strongly disagree and 5 = strongly agree

§ Personal discrimination scale adapted from Everyday discrimination scale[36]; endorsement marked by any response other than “Never” for all questions; range of possible score by question 1-5 with 1 = never and 5 = always

Telehealth Satisfaction Scale (TeSS [17])[37] is a 10-item measure with with range of possible score by question from 1 to 3 with 1 = “excellent” and 3 = “Poor/fair”.

Scale scores for RHC, PDS, and TeSS only computed when all items were answered.

Patient interviews lasted from 25-45 minutes and focus groups from 45-60 minutes. We

present themes from patients and clinical team data collection.

## Patient Findings

Perceived access to care: Most patients did not report personally experiencing or witnessing in others receiving differential access to care due to personal identity.

However, several patients noted differential treatment around receipt of benefits, pain medication, and appointment scheduling: “...*All my life, from the service part all the way up to where [I am] today, I feel like I’ve had to fight for myself...*” (video-user). Reasons for differential treatment were attributed to characteristics such as age, racial identity, disability status, and/or a history of substance use disorder.

1  
2  
3 Patients commonly reported challenges to video-based visits due to having inadequate  
4 technical skills or a lack of access to needed equipment/broadband. Only half of  
5  
6 patients who had successfully completed video-based visits previously felt confident in  
7  
8 their ability to access video-based care in the future. For patients who did feel confident,  
9  
10 having a successful first video visit experience was reassuring. Among those without a  
11  
12 prior video visit, there were varying degrees of confidence: *"I've never used a computer,*  
13  
14 *so I'm a little shaky of it, you understand?.... because if I get the thing and I don't know*  
15  
16 *how to use it, that's not worth a nickel...You hit one wrong button and you're out of*  
17  
18 *business"* (video non-user).  
19  
20  
21  
22  
23

24 Satisfaction with care: Patients expressed multiple concerns about receiving care by  
25  
26 video. First, patients commonly reported perceptions that video visits were of lower  
27  
28 quality and more impersonal compared to in-person: *"Face to face makes it feel that I*  
29  
30 *matter, that I'm important to the provider"* (video-user). Second, patients with and  
31  
32 without prior video visits noted concerns about a provider's ability to adequately assess  
33  
34 medical concerns via video: *"They can't make medical decisions without seeing you in*  
35  
36 *the face, looking at your body"* (video-user). Third, many patients reported completing  
37  
38 telephone-based visits and generally perceived phone-based visits to be lower quality  
39  
40 than either in-person or video: *"it is hard to know on [the] phone [what the provider] is*  
41  
42 *doing, whether they're listening to you or understanding what you are saying. I'd prefer*  
43  
44 *in-person visits, but video would be the next best thing"* (video non-user). Finally,  
45  
46 patients wanted to choose whether to have their primary care encounter in-person or via  
47  
48 video. Many patients reported being told that their visit would occur via video rather than  
49  
50 being offered a choice. Some patients who had not completed video-based visits  
51  
52  
53  
54  
55  
56  
57  
58  
59  
60

1  
2  
3 thought that they might feel more relaxed and less rushed at home: *“Very convenient if*  
4  
5 *I’m going to stay on top of my health”* (video non-user).  
6  
7

8 Preferences for care: While patients acknowledged the potential convenience of video-  
9  
10 based care, most individuals still preferred in-person: *“given the conditions we face*  
11  
12 *today [COVID-19 pandemic], I understand it. But my preference is in the office”* (video  
13  
14 non-user). Reasons given for this preference centered on the experience of in-person  
15  
16 care: *“If it was up to me, I’d go to the VA. It is a form of release for me...It’s a way for*  
17  
18 *me to get out of the house”* (video-user). In-person care also was noted to offer better  
19  
20 eye contact, rapport building, communication, physical exam, and the opportunity to  
21  
22 coordinate care. The majority of patients thought visit modality should be tied to clinical  
23  
24 need. Most veterans preferred video for mental health, while in-person was preferred for  
25  
26 specific conditions, such as pain or urgent concerns. This preference appears to be  
27  
28 related to a sense that either the provider could not fully evaluate the patient remotely or  
29  
30 the patient could not fully communicate their concerns when not face-to-face: *“They can*  
31  
32 *see what’s going on and know if you’re having any difficulties. On video, you have to*  
33  
34 *stay in one position, they don’t know how you feel, you’re just talking...in person, they*  
35  
36 *can tell if you’re not genuine”* (video-user).  
37  
38  
39  
40  
41  
42  
43

#### 44 **Clinical team member findings**

45  
46 Perceived access to care: Clinical teams noted that digital connectivity could present  
47  
48 problems for accessing care. Specifically, video platform malfunction could consume  
49  
50 significant visit time. Additionally, many providers were uncomfortable with available  
51  
52 technology for video visits. Team members noted a diminished interpersonal connection  
53  
54 during video-based visit and that sometimes both parties (patients and clinicians) were  
55  
56  
57  
58  
59  
60

1  
2  
3 distracted or not fully engaged. Difficulty engaging with certain patients via video was  
4 particularly problematic – specifically those with cognitive impairment or significant  
5 sensory or functional impairments. One strategy to overcome technical barriers was  
6 having a family member or friend provide logistical support during a video visit. Overall,  
7 clinical teams reported that patients living in rural areas and older patients had the most  
8 difficulty engaging in video-based care due to limited availability of and comfort with  
9 technology.

10  
11 Satisfaction with care: Clinicians felt that video visits were inadequate for certain  
12 situations and often scheduled without regard to clinical appropriateness of the  
13 modality. Management of chronic condition (e.g., hypertension) was given as a specific  
14 example that could be appropriate for video, as were dermatologic conditions, mental  
15 health, and non-traumatic single joint pain. Clinical conditions not appropriate for video  
16 would include new patient visits, patients with cognitive impairment, or new conditions.

17  
18 Preferences for care: Clinicians expressed frustration when video-based care did not  
19 align with the patient's clinical problem. In addition, teams noted a significant need for  
20 streamlining the clinic workflow process which was felt to be designed for in-person  
21 visits and not conducive to virtual care. For example, there is no one identified to be  
22 able to contact patients in advance to verify that they have a working link for the video  
23 visit and verify that they are 'checked-in' online before an appointment due to in-person  
24 clinic demands.

## 25 26 27 28 29 30 31 32 33 34 35 36 37 38 39 40 41 42 43 44 45 46 47 48 49 50 51 **Clinical algorithm** 52 53 54 55 56 57 58 59 60



1  
2  
3 We identified two key decision points for matching a specific patient to a particular  
4 modality for an encounter. First, it is important to determine if the patient and their  
5 health concerns are clinically appropriate for video; second, patients need to be  
6 assessed for readiness for video visits (e.g., having accessible technology, adequate  
7 technical skills); three, patients need to agree to video modality use. These decision  
8 points seem to be implied in the existing primary care processes, but were not explicit or  
9 consistently applied. We combined these decision points into one ready-to-implement  
10 algorithm to clearly link the importance of both clinical appropriateness and patient  
11 readiness. First, the algorithm prompts clinical consideration of the appropriateness of a  
12 patient's current clinical concern for visit modality type (see Figure 2). Once a patient  
13 situation is deemed clinically appropriate for video-based care, the algorithm then  
14 requires a patient's response regarding interest in video-based care. If the patient is  
15 interested in a video visit, the algorithm proceeds to incorporate what equipment and  
16 technological support are needed in advance of the video appointment. Also identified  
17 through the integration of patient and clinical team findings were key video visit  
18 preparation steps (Table 2)

**Table 2. Clinician and patient experiences with primary care video visits**

| Domain                               | Patient                                                                                                                                                                                                                                                                                                                                                                                            | Clinical Team                                                                                                                                                                                                                                                                                                                                                                                                                                                                         | Implications for clinical algorithm                                                                                                                                                                                                                                                                                                                                                                                                                                                                                      |
|--------------------------------------|----------------------------------------------------------------------------------------------------------------------------------------------------------------------------------------------------------------------------------------------------------------------------------------------------------------------------------------------------------------------------------------------------|---------------------------------------------------------------------------------------------------------------------------------------------------------------------------------------------------------------------------------------------------------------------------------------------------------------------------------------------------------------------------------------------------------------------------------------------------------------------------------------|--------------------------------------------------------------------------------------------------------------------------------------------------------------------------------------------------------------------------------------------------------------------------------------------------------------------------------------------------------------------------------------------------------------------------------------------------------------------------------------------------------------------------|
| Perceived access to video-based care | <ul style="list-style-type: none"> <li>• Some experiences of differential treatment by personal identity in health care setting</li> <li>• Barriers: Technical skills and equipment, lack of confidence</li> <li>• Scheduling generally easy</li> </ul>                                                                                                                                            | <ul style="list-style-type: none"> <li>• Video platform malfunctions take up valuable clinical time</li> <li>• Diminished interpersonal connection with patients</li> <li>• Not appropriate for patients with specific limitations (e.g. cognitive impairment, significant sensory impairment)</li> <li>• Rural dwelling and older adults had most difficulty accessing video visits</li> <li>• First video visit was the hardest</li> <li>• Family friends can be helpful</li> </ul> | <ul style="list-style-type: none"> <li>• Clinical team training to optimize interpersonal rapport via video</li> <li>• Clinical triage for video visit appropriateness</li> <li>• Offer all patients opportunity to practice video visits prior to scheduled appointment, especially before first visit</li> <li>• Encourage patient to recruit family/friends for assistance</li> <li>• Assess patient preparedness for video visit (including broadband access, equipment, technical literacy)</li> </ul>              |
| Satisfaction with video-based care   | <p>Negative aspects of video visits:</p> <ul style="list-style-type: none"> <li>• Impersonal</li> <li>• Inadequate for quality medical care</li> <li>• Providers distracted</li> <li>• Technical barriers</li> </ul> <p>Positive aspects of video visits:</p> <ul style="list-style-type: none"> <li>• More relaxed</li> <li>• Less rushed</li> <li>• Desired choice for visit modality</li> </ul> | <ul style="list-style-type: none"> <li>• Video inadequate for some clinical presentations</li> <li>• Video not appropriate for new patient visits</li> </ul>                                                                                                                                                                                                                                                                                                                          | <ul style="list-style-type: none"> <li>• Transparency with patients about when video is appropriate and why it is being offered</li> <li>• Use same approach regarding modality choice for all patients</li> <li>• Enlist technical support for troubleshooting</li> <li>• Establish a back-up plan for connection in advance of appointment (e.g. alternate video platforming, telephone)</li> <li>• Prepare patients for optimal engagement</li> <li>• Give patients choice of participating in video visit</li> </ul> |
| Attitudes towards video-based care   | <ul style="list-style-type: none"> <li>• Many preferred in-person despite convenience of video</li> <li>• In-person care perceived as better than video</li> </ul>                                                                                                                                                                                                                                 | <ul style="list-style-type: none"> <li>• Frustrated when modality choice made without consideration for clinical appropriateness</li> </ul>                                                                                                                                                                                                                                                                                                                                           | <ul style="list-style-type: none"> <li>• Allow in-person as per patient preference</li> <li>• Adapt clinic team workflow to support multi-modality clinical care</li> </ul>                                                                                                                                                                                                                                                                                                                                              |

1  
2  
3  
4  
5  
6  
7  
8  
9  
10  
11  
12  
13  
14  
15  
16  
17  
18  
19  
20  
21  
22  
23  
24  
25  
26  
27  
28  
29  
30  
31  
32  
33  
34  
35  
36  
37  
38  
39  
40  
41  
42  
43  
44  
45  
46  
47

- Appeal of ritual of in-person care
- Video not always best for patient needs

- Need for clinic workflows to adapt to virtual care requirements
- Management of video-based visit needs should not fall solely on providers

- Interdisciplinary collaboration around video visit workflow

For peer review only

and core components of important patient facing materials for video visit preparation (Table 3).

**Table 3. Patient teaching points before a video visit**

| Patient Teaching Before Video Visit                       |                                                   |                                                                                                                       |
|-----------------------------------------------------------|---------------------------------------------------|-----------------------------------------------------------------------------------------------------------------------|
| At Scheduling                                             | In Advance of Visit                               | During a Visit                                                                                                        |
| Explain when video visit is appropriate                   | Prepare for visit as you would an in-person visit | Limit distractions                                                                                                    |
| Explain that clinical team will determine appropriateness | Join video platform at least 15 minutes early     | Do not multi-task during visit (e.g., do not clean house)                                                             |
| Give patients a choice                                    | Ensure visual and auditory privacy                | Do not drive during video visit                                                                                       |
|                                                           | Recruit a family member to help                   | Be aware that your provider may at times not be making eye contact while looking at medical record on a second screen |
|                                                           | Create a back-up plan                             |                                                                                                                       |

## Discussion

We identified patient and primary care team experiences with video visits across key dimensions of telehealth access and used our findings to develop a novel algorithm to guide the incorporation of equitable video visits into primary care. Consistent with previous literature, we confirmed that clinicians have concerns about technology malfunction and inadequate technical support, and recognize the importance of having a family or friend to manage the technology during a visit [24-26]. Our study provides new insight in virtual care use. We found that patients are concerned with quality of

1  
2  
3 video-based care, prefer to have choice of visit modality, and place personal value on  
4  
5 in-person experience despite convenience costs.  
6  
7

8 Our intention was to develop an algorithm that could support equitable access to virtual  
9  
10 care; however, we did not identify a pattern about which patients would prefer video-  
11  
12 based care. Thus, we incorporated features intended to promote access equity: 1)  
13  
14 emphasized the importance of using this algorithm with all patients to avoid implicit bias  
15  
16 regarding who may or may not want a video visit and and/or need technological support;  
17  
18 2) underscored patient choice regarding visit modality when possible; 3) identified  
19  
20 actions to promote optimal patient engagement during a video visit; and 4) recognized  
21  
22 clinician behaviors that promote trustworthiness and transparency during video-based  
23  
24 encounters.  
25  
26  
27  
28

29 We identified that both patients and clinicians expressed concerns about the impact of  
30  
31 video visits on patient-provider relationship and subsequent clinical care quality. In  
32  
33 particular, patients expressed misgivings about quality of care received via video. While  
34  
35 the importance of patient confidence in virtual care has been previously noted [27, 28],  
36  
37 our study adds that this may not be true for all types of care OR at all points in the care  
38  
39 continuum. Similar to patients, clinicians commonly described concerns about the  
40  
41 interpersonal quality of virtual clinical interactions, especially around building rapport  
42  
43 with new patients [29] and loss of body language and social cues [30, 31]. Strategies to  
44  
45 improve the virtual care experience including improving accessibility through access to  
46  
47 closed captioning and language interpretation [32], incorporation of trauma-informed  
48  
49 care principles such as transparency about during visit actions and maintaining good  
50  
51 eye contact [32, 33], and adequate technology training for patients and clinical teams  
52  
53  
54  
55  
56  
57  
58  
59  
60

1  
2  
3 [24, 34]. Together with previous findings, our work points to the need for an intentional  
4 approach to the implementation of high-quality, equitable, patient-centered video-based  
5 care.  
6  
7  
8  
9

10 This research has limitations. First, our clinical support algorithm was informed by  
11 qualitative data from clinical teams in rural North Carolina and Black veterans residing in  
12 rural areas. However, it may be applicable to other rural, minoritized patients using  
13 virtual care in other health care systems with similar reimbursement pressures. Second,  
14 we focused on the context of primary care and, thus, the algorithm may not be relevant  
15 to specialty care. For example, specialty clinics typically provide care for individual  
16 conditions or organ systems for which it may be easier to predict clinical  
17 appropriateness of video-based care. Third, we focused this algorithm on the choice  
18 between video-based visits vs care delivered in-person because health care system and  
19 insurance reimbursement policies have generally favored video-based care and not  
20 phone-based care. Additionally, telephone has been used for patient care for decades  
21 in the VA. For clinics that continue to employ telephone as an equivalent to in-person  
22 care, this algorithm will not address clinic workflow needs. Fourth, the interviewer for  
23 both the focus groups and the patient interviews identifies as white, which may have  
24 influenced participant willingness to disclose racial discrimination experiences. Our  
25 center has made a focused effort to hire and train diverse qualitative staff since the  
26 conclusion of this work. Finally, determinants of access to health care expand beyond  
27 clinic level policies and actions thus broader innovation and changes will be required to  
28 address access disparities.  
29  
30  
31  
32  
33  
34  
35  
36  
37  
38  
39  
40  
41  
42  
43  
44  
45  
46  
47  
48  
49  
50  
51  
52  
53

## 54 **Conclusions**

55  
56  
57  
58  
59  
60

1  
2  
3 Optimal and equitable incorporation of video visits into primary care delivery requires  
4 thoughtful planning and potential re-working of clinic workflow. Assessment of clinical  
5 appropriateness of a virtual modality as well as patient preference and technological  
6 readiness are crucial before each visit. Next steps for this work include evaluating the  
7 feasibility of our algorithm in a primary care practice and validating measures to assess  
8 patient interest in video visits. It will be critical to identify determinants of video visit  
9 uptake and areas needing adaptation for site specific characteristics. Informed matching  
10 of patients and clinical situations to the right visit modality, along with individual patient  
11 technology support could contribute to broader virtual access disparities.  
12  
13  
14  
15  
16  
17  
18  
19  
20  
21  
22  
23

## 24 **Figure Legend**

25  
26  
27 **Figure 1. Algorithm Development Process**

28  
29  
30 **Figure 2. Clinical Support Algorithm for Incorporation of Video Visits into Primary Care**  
31 **Workflow**

32  
33  
34  
35 **Appendix. Process Map of Pre-existing Primary Care Workflow for Incorporation of**  
36 **Video-Based Care**

37  
38  
39  
40  
41  
42  
43 **Prior Presentations:** Partial findings from this project were presented at the 2021  
44 Dissemination and Implementation Virtual Conference.

45  
46  
47  
48 **Contributorship Statement:** KMG co-conceptualized this project, participated in data  
49 collection, analysis and interpretation, and drafted this work; KRP developed data collection and  
50 analysis plan, collected the data, contributed to analysis, and edited the manuscript; AL, CW,  
51 and MSB participated in data collection, analysis and interpretation, and edited the manuscript;  
52  
53  
54  
55  
56  
57  
58  
59  
60

1  
2  
3 HBB contributed to conceptualization, interpretation, and edited this manuscript. HW supported  
4 data collection and analysis and edited this manuscript; DVB contributed to data analysis,  
5 interpretation and edited this manuscript. LLZ co-conceptualized this project, participated in data  
6 collection, analysis and interpretation, and drafted this work.  
7  
8  
9  
10

11  
12 **Competing interests:** The content and views expressed here are solely those of the authors  
13 and do not reflect those of the U.S. Federal Government. Dr. Lewinski reports receiving funds  
14 from PhRMA Foundation and Otsuka.  
15

16  
17 **Funding:** This work received funding from the VA Access Research Consortium (no funding  
18 number given) and was supported by the Durham Center of Innovation to Accelerate Discovery  
19 and Practice Transformation (ADAPT), (CIN 13-410) at the Durham VA Health Care System. Dr.  
20 Lewinski was supported by VA HSR&D grants #18-234, Drs. Shepherd-Banigan and Blalock by  
21 VA HSR&D Career Development Award (CDA #17-006 and # 19-035 respectively), and Dr.  
22 Walsh by VA OAA VA Quality Scholars Fellowship Program (AF-3Q-05-2019-C).  
23  
24  
25  
26

27  
28 **Data sharing statement:** Due to institutional privacy agreements, authors are unable to share  
29 data used for this work.  
30

31  
32 **Acknowledgements:** We would like to thank Dr. Gene Oddone for this early support of  
33 this project. We would also like to thank the [redacted], the [redacted] Veteran  
34 Engagement Panel, and the [redacted] Antiracism and Black Equity Advisory Board for  
35 consultation during development of this project. Additionally, we thank Eric Monson for  
36 data visualization consultation and Sharon Thompson for editorial assistance.  
37  
38  
39  
40  
41  
42  
43

## 44 **References**

- 45  
46 1. Elliott, T., et al., *Beyond Convenience: Patients' Perceptions of Physician Interactional Skills and*  
47 *Compassion via Telemedicine*. Mayo Clin Proc Innov Qual Outcomes, 2020. 4(3): p. 305-314.  
48 2. Services, C.f.M.M. *Medicare Telemedicine Health Care Provider Fact Sheet*. 2021 March 17, 2020  
49 [cited 2021 12/03/21]; Available from: [https://www.cms.gov/newsroom/fact-sheets/medicare-](https://www.cms.gov/newsroom/fact-sheets/medicare-telemedicine-health-care-provider-fact-sheet)  
50 [telemedicine-health-care-provider-fact-sheet](https://www.cms.gov/newsroom/fact-sheets/medicare-telemedicine-health-care-provider-fact-sheet).  
51 3. Lewinski, A.A., et al., *Accelerating Implementation of Virtual Care in an Integrated Health Care*  
52 *System: Future Research and Operations Priorities*. J Gen Intern Med, 2021.  
53  
54  
55  
56  
57  
58  
59  
60



4. Pagán, V.M., K.S. McClung, and C.J. Peden, *An Observational Study of Disparities in Telemedicine Utilization in Primary Care Patients Before and During the COVID-19 Pandemic*. *Telemed J E Health*, 2021.
5. Poeran, J., et al., *Pre-existing Disparities and Potential Implications for the Rapid Expansion of Telemedicine in Response to the Coronavirus Disease 2019 Pandemic*. *Med Care*, 2021. **59**(8): p. 694-698.
6. Lam, K., et al., *Assessing Telemedicine Unreadiness Among Older Adults in the United States During the COVID-19 Pandemic*. *JAMA Intern Med*, 2020. **180**(10): p. 1389-1391.
7. Roberts, E.T. and A. Mehrotra, *Assessment of Disparities in Digital Access Among Medicare Beneficiaries and Implications for Telemedicine*. *JAMA Intern Med*, 2020. **180**(10): p. 1386-1389.
8. Ferguson, J.M., et al., *Virtual care expansion in the Veterans Health Administration during the COVID-19 pandemic: clinical services and patient characteristics associated with utilization*. *J Am Med Inform Assoc*, 2021. **28**(3): p. 453-462.
9. Luo, J., et al., *Telemedicine Adoption during the COVID-19 Pandemic: Gaps and Inequalities*. *Appl Clin Inform*, 2021. **12**(4): p. 836-844.
10. Rodriguez, J.A., et al., *Differences in the use of telephone and video telemedicine visits during the COVID-19 pandemic*. *Am J Manag Care*, 2021. **27**(1): p. 21-26.
11. Hilbert, M., *The end justifies the definition: The manifold outlooks on the digital divide and their practical usefulness for policy-making*. *Telecommunications Policy*, 2011. **35**(8): p. 715-736.
12. Center, P.R. *Internet/Broadband Fact Sheet*. 2021 [cited 2021 12/03/21]; Available from: <https://www.pewresearch.org/internet/fact-sheet/internet-broadband/>.
13. Pierce, R.P. and J.J. Stevermer, *Disparities in use of telehealth at the onset of the COVID-19 public health emergency*. *J Telemed Telecare*, 2020: p. 1357633x20963893.
14. Tong, A., P. Sainsbury, and J. Craig, *Consolidated criteria for reporting qualitative research (COREQ): a 32-item checklist for interviews and focus groups*. *Int J Qual Health Care*, 2007. **19**(6): p. 349-57.
15. Fortney, J.C., et al., *A re-conceptualization of access for 21st century healthcare*. *J Gen Intern Med*, 2011. **26 Suppl 2**(Suppl 2): p. 639-47.
16. Health, O.o.R. *Rural Veterans*. 2021 [cited 2021 12/03/21]; Available from: <https://www.ruralhealth.va.gov/aboutus/ruralvets.asp>.
17. Administration, V.H., *COVID-19 Response Plan*, O.o.E. Management, Editor. 2020.
18. Heher Y, C.Y., *Process Mapping: A Cornerstone of Quality Improvement*, in *Cancer Cytopathology*. 2017.
19. Lewinski, A.A., et al., *Applied Rapid Qualitative Analysis to Develop a Contextually Appropriate Intervention and Increase the Likelihood of Uptake*. *Med Care*, 2021. **59**(Suppl 3): p. S242-s251.
20. Lewinski, A.A., et al., *Veterans' Interpretation of Diabetes Distress in Diabetes Self-Management: Findings From Cognitive Interviews*. *Sci Diabetes Self Manag Care*, 2021. **47**(5): p. 391-403.
21. Nevedal, A.L., et al., *Rapid versus traditional qualitative analysis using the Consolidated Framework for Implementation Research (CFIR)*. *Implement Sci*, 2021. **16**(1): p. 67.
22. Patton, M., *Qualitative research & evaluation methods: Integrating theory and practice*. 2014: Sage Publications.
23. *Proposal for clinical algorithm standards*. *Society for Medical Decision Making Committee on Standardization of Clinical Algorithms*. *Med Decis Making*, 1992. **12**(2): p. 149-54.
24. Barkai, G., et al., *Patient and clinician experience with a rapidly implemented large-scale video consultation program during COVID-19*. *Int J Qual Health Care*, 2021. **33**(1).
25. Barsom, E.Z., et al., *Emergency upscaling of video consultation during the COVID-19 pandemic: Contrasting user experience with data insights from the electronic health record in a large academic hospital*. *Int J Med Inform*, 2021. **150**: p. 104463.

- 1
  - 2
  - 3
  - 4
  - 5
  - 6
  - 7
  - 8
  - 9
  - 10
  - 11
  - 12
  - 13
  - 14
  - 15
  - 16
  - 17
  - 18
  - 19
  - 20
  - 21
  - 22
  - 23
  - 24
  - 25
  - 26
  - 27
  - 28
  - 29
  - 30
  - 31
  - 32
  - 33
  - 34
  - 35
  - 36
  - 37
  - 38
  - 39
  - 40
  - 41
  - 42
  - 43
  - 44
  - 45
  - 46
  - 47
  - 48
  - 49
  - 50
  - 51
  - 52
  - 53
  - 54
  - 55
  - 56
  - 57
  - 58
  - 59
  - 60
26. Heyworth, L., Kirsh, S., Zulman, D., Ferguson, J., Kizer, K. , *Expanding Access through Virtual Care: The VA's Early Experience with Covid-19*. N Engl J Med, 2020.
27. Lopez, A.M., K. Lam, and R. Thota, *Barriers and Facilitators to Telemedicine: Can You Hear Me Now?* Am Soc Clin Oncol Educ Book, 2021. **41**: p. 25-36.
28. Gordon, H.S., et al., *"I'm Not Feeling Like I'm Part of the Conversation" Patients' Perspectives on Communicating in Clinical Video Telehealth Visits*. J Gen Intern Med, 2020. **35**(6): p. 1751-1758.
29. Ramaswamy, A., et al., *Patient Satisfaction With Telemedicine During the COVID-19 Pandemic: Retrospective Cohort Study*. J Med Internet Res, 2020. **22**(9): p. e20786.
30. Gomez, T., et al., *A Qualitative Study of Primary Care Physicians' Experiences With Telemedicine During COVID-19*. J Am Board Fam Med, 2021. **34**(Suppl): p. S61-s70.
31. Srinivasan, M., et al., *Qualitative Assessment of Rapid System Transformation to Primary Care Video Visits at an Academic Medical Center*. Ann Intern Med, 2020. **173**(7): p. 527-535.
32. Presley C, H.A., Warnick J, *Diabetes SIG How to Prepare for your Telemedicine Appointment*. 2021.
33. Gerber, M.R., et al., *Trauma-Informed Telehealth in the COVID-19 Era and Beyond*. Fed Pract, 2020. **37**(7): p. 302-308.
34. Alkureishi, M.A., et al., *Clinician Perspectives on Telemedicine: Observational Cross-sectional Study*. JMIR Hum Factors, 2021. **8**(3): p. e29690.
35. Hausmann, L.R., et al., *Perceived racial discrimination in health care and its association with patients' healthcare experiences: does the measure matter?* Ethn Dis, 2010. **20**(1): p. 40-7.
36. Williams, D.R., et al., *Racial Differences in Physical and Mental Health: Socio-economic Status, Stress and Discrimination*. J Health Psychol, 1997. **2**(3): p. 335-51.
37. Morgan, D.G., et al., *The telehealth satisfaction scale: reliability, validity, and satisfaction with telehealth in a rural memory clinic population*. Telemed J E Health, 2014. **20**(11): p. 997-1003.

## Patients Semi-structured Interviews

### Purpose:

- Obtain patient experiences and perceptions of video-based primary care
- Center data collection on patient population which has historically experienced systemic healthcare access barriers

### Participants

Rural-dwelling, African-American veterans with at least one primary care visit in the last 12 months

### Questions guided by:

Fortney conceptualization of access to care (e.g., perceived access to care, satisfaction with care)

### Overall goal:

To develop an equitable, patient/clinician centered algorithm to optimize the use of video-visits in primary care

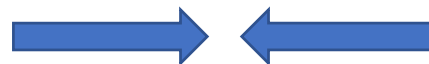

- Integration of findings from both samples with direct implications for when and how to incorporate video visits into primary care delivery
- Findings were organized across common themes and compared to identify ideal balance across patient/clinician perspectives of use of video visits.
- Development and iterative review of algorithm building on existing clinic workflows

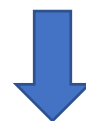

Developed algorithm to support incorporation of video visits into primary care delivery

## Primary Care Team Focus Groups

### Purpose:

- Obtain clinical team experiences and perceptions of delivery care via video-visits
- Solicit clinically appropriate role for and incorporation of video visits in primary care delivery

### Participants

Multi-disciplinary primary care team members serving large rural population in the Southeastern US

### Questions guided by:

Process map of existing workflow for video visits; Fortney conceptualization of access to care (e.g., digital connectivity, quality of interpersonal experience)

1  
2  
3  
4  
5  
6  
7  
8  
9  
10  
11  
12  
13  
14  
15  
16  
17  
18  
19  
20  
21  
22  
23  
24  
25  
26  
27  
28  
29  
30  
31  
32  
33  
34  
35  
36  
37  
38  
39  
40  
41

1  
2  
3  
4  
5  
6  
7  
8  
9  
10  
11  
12  
13  
14  
15  
16  
17  
18  
19  
20  
21  
22  
23  
24  
25  
26  
27  
28  
29  
30  
31  
32  
33  
34  
35  
36  
37  
38  
39  
40  
41  
42  
43  
44  
45  
46  
47  
48  
49  
50  
51  
52  
53  
54  
55  
56  
57  
58  
59  
60

Patient seeking primary care clinical visit

**Consider Patient Factors**

- Is patient new to clinic/provider?
- Does the patient have cognitive impairment?
- Does patient have sensory impairment (*significant hearing loss or visual impairment*)?

Yes

Schedule in-person visit 

**Initiate Clinical Triage**

- Does patient require urgent, in-person evaluation (*eg, altered mental status, difficulty breathing, chest pain*)?

Yes

Refer for emergent care 

No

**Continue Clinical Triage**

- Is patient's concern a chronic medical issue (*eg, single joint pain, stable mental health conditions, chronic disease management*)?
- Has the patient's concern been identified as appropriate for video-based evaluation?

No

Schedule in-person visit 

Yes

**Assess video access and interest**

- Is patient interested in conducting visit by video?
- Does patient have video-capable equipment?
- Does patient have access to high-speed internet or broadband?
- Does patient have access to location with auditory and visual privacy?

No

Schedule in-person visit 

Yes

**Assess need for technical assistance**

- Has patient successfully completed a previous video-based visit on current platform?
- Does patient have family or friends that could assist with technology?

Yes

Schedule video visit 

No

Schedule for video-based visit **and** encourage patient to conduct test video-visit call 

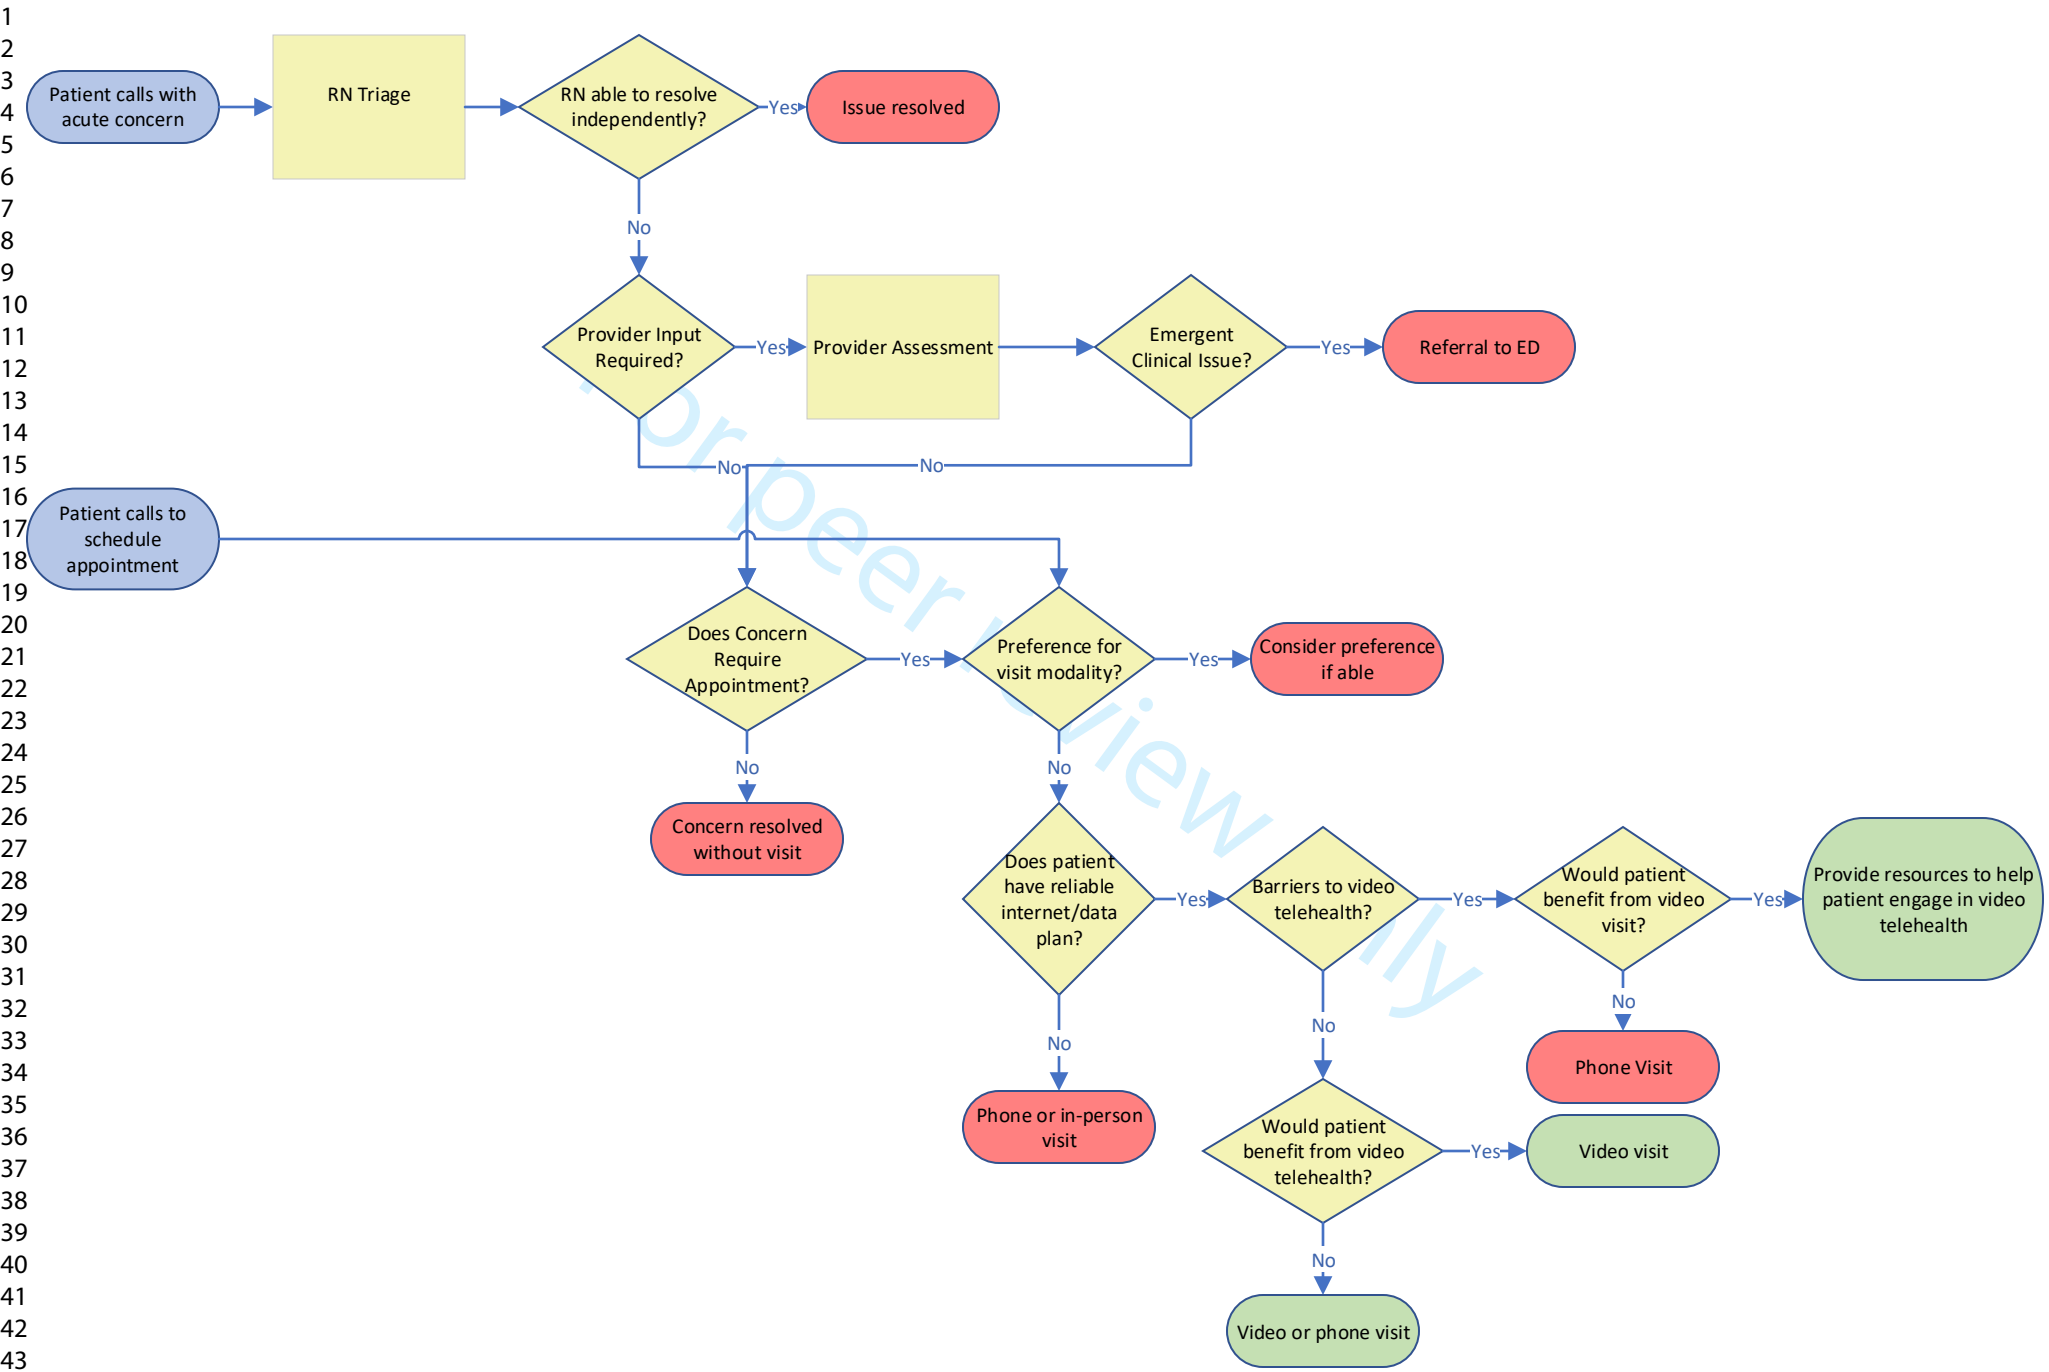

45 Appendix 1. Process Map of Pre-existing Primary Care Workflow for Incorporation of Video-based Care  
 46 Developed by CW building from experience with local quality improvement telehealth projects

## Standards for Reporting Qualitative Research (SRQR)\*

<http://www.equator-network.org/reporting-guidelines/srqr/>

Page/line no(s).

### Title and abstract

|                                                                                                                                                                                                                                                              |     |
|--------------------------------------------------------------------------------------------------------------------------------------------------------------------------------------------------------------------------------------------------------------|-----|
| <p><b>Title</b> - Concise description of the nature and topic of the study Identifying the study as qualitative or indicating the approach (e.g., ethnography, grounded theory) or data collection methods (e.g., interview, focus group) is recommended</p> | 1   |
| <p><b>Abstract</b> - Summary of key elements of the study using the abstract format of the intended publication; typically includes background, purpose, methods, results, and conclusions</p>                                                               | 2-3 |

### Introduction

|                                                                                                                                                                     |     |
|---------------------------------------------------------------------------------------------------------------------------------------------------------------------|-----|
| <p><b>Problem formulation</b> - Description and significance of the problem/phenomenon studied; review of relevant theory and empirical work; problem statement</p> | 4-5 |
| <p><b>Purpose or research question</b> - Purpose of the study and specific objectives or questions</p>                                                              | 5   |

### Methods

|                                                                                                                                                                                                                                                                                                                                                                                                             |     |
|-------------------------------------------------------------------------------------------------------------------------------------------------------------------------------------------------------------------------------------------------------------------------------------------------------------------------------------------------------------------------------------------------------------|-----|
| <p><b>Qualitative approach and research paradigm</b> - Qualitative approach (e.g., ethnography, grounded theory, case study, phenomenology, narrative research) and guiding theory if appropriate; identifying the research paradigm (e.g., postpositivist, constructivist/ interpretivist) is also recommended; rationale**</p>                                                                            | 5-7 |
| <p><b>Researcher characteristics and reflexivity</b> - Researchers' characteristics that may influence the research, including personal attributes, qualifications/experience, relationship with participants, assumptions, and/or presuppositions; potential or actual interaction between researchers' characteristics and the research questions, approach, methods, results, and/or transferability</p> | 6   |
| <p><b>Context</b> - Setting/site and salient contextual factors; rationale**</p>                                                                                                                                                                                                                                                                                                                            | 6   |
| <p><b>Sampling strategy</b> - How and why research participants, documents, or events were selected; criteria for deciding when no further sampling was necessary (e.g., sampling saturation); rationale**</p>                                                                                                                                                                                              | 6-7 |
| <p><b>Ethical issues pertaining to human subjects</b> - Documentation of approval by an appropriate ethics review board and participant consent, or explanation for lack thereof; other confidentiality and data security issues</p>                                                                                                                                                                        | 5   |
| <p><b>Data collection methods</b> - Types of data collected; details of data collection procedures including (as appropriate) start and stop dates of data collection and analysis, iterative process, triangulation of sources/methods, and modification of procedures in response to evolving study findings; rationale**</p>                                                                             | 6-7 |

|                       |                                                                                                                                                                                                                                                       |     |
|-----------------------|-------------------------------------------------------------------------------------------------------------------------------------------------------------------------------------------------------------------------------------------------------|-----|
| 1<br>2<br>3<br>4<br>5 | <b>Data collection instruments and technologies</b> - Description of instruments (e.g., interview guides, questionnaires) and devices (e.g., audio recorders) used for data collection; if/how the instrument(s) changed over the course of the study | 6-7 |
| 6<br>7<br>8           | <b>Units of study</b> - Number and relevant characteristics of participants, documents, or events included in the study; level of participation (could be reported in results)                                                                        | 6-7 |
| 9<br>10<br>11<br>12   | <b>Data processing</b> - Methods for processing data prior to and during analysis, including transcription, data entry, data management and security, verification of data integrity, data coding, and anonymization/de-identification of excerpts    | 6-8 |
| 13<br>14<br>15<br>16  | <b>Data analysis</b> - Process by which inferences, themes, etc., were identified and developed, including the researchers involved in data analysis; usually references a specific paradigm or approach; rationale**                                 | 6-8 |
| 17<br>18<br>19<br>20  | <b>Techniques to enhance trustworthiness</b> - Techniques to enhance trustworthiness and credibility of data analysis (e.g., member checking, audit trail, triangulation); rationale**                                                                | 5-7 |

### Results/findings

|                      |                                                                                                                                                                                                   |             |
|----------------------|---------------------------------------------------------------------------------------------------------------------------------------------------------------------------------------------------|-------------|
| 23<br>24<br>25<br>26 | <b>Synthesis and interpretation</b> - Main findings (e.g., interpretations, inferences, and themes); might include development of a theory or model, or integration with prior research or theory | 8-11        |
| 27<br>28<br>29       | <b>Links to empirical data</b> - Evidence (e.g., quotes, field notes, text excerpts, photographs) to substantiate analytic findings                                                               | Table 1 & 2 |

### Discussion

|                                  |                                                                                                                                                                                                                                                                                                                                                                                                             |       |
|----------------------------------|-------------------------------------------------------------------------------------------------------------------------------------------------------------------------------------------------------------------------------------------------------------------------------------------------------------------------------------------------------------------------------------------------------------|-------|
| 32<br>33<br>34<br>35<br>36<br>37 | <b>Integration with prior work, implications, transferability, and contribution(s) to the field</b> - Short summary of main findings; explanation of how findings and conclusions connect to, support, elaborate on, or challenge conclusions of earlier scholarship; discussion of scope of application/generalizability; identification of unique contribution(s) to scholarship in a discipline or field | 12-15 |
| 38<br>39                         | <b>Limitations</b> - Trustworthiness and limitations of findings                                                                                                                                                                                                                                                                                                                                            | 14    |

### Other

|                |                                                                                                                                               |   |
|----------------|-----------------------------------------------------------------------------------------------------------------------------------------------|---|
| 42<br>43<br>44 | <b>Conflicts of interest</b> - Potential sources of influence or perceived influence on study conduct and conclusions; how these were managed | 3 |
| 45<br>46       | <b>Funding</b> - Sources of funding and other support; role of funders in data collection, interpretation, and reporting                      | 3 |

\*The authors created the SRQR by searching the literature to identify guidelines, reporting standards, and critical appraisal criteria for qualitative research; reviewing the reference lists of retrieved sources; and contacting experts to gain feedback. The SRQR aims to improve the transparency of all aspects of qualitative research by providing clear standards for reporting qualitative research.



1  
2  
3  
4  
5  
6  
7  
8  
9  
10  
11  
12  
13  
14  
15  
16  
17  
18  
19  
20  
21  
22  
23  
24  
25  
26  
27  
28  
29  
30  
31  
32  
33  
34  
35  
36  
37  
38  
39  
40  
41  
42  
43  
44  
45  
46  
47  
48  
49  
50  
51  
52  
53  
54  
55  
56  
57  
58  
59  
60

\*\*The rationale should briefly discuss the justification for choosing that theory, approach, method, or technique rather than other options available, the assumptions and limitations implicit in those choices, and how those choices influence study conclusions and transferability. As appropriate, the rationale for several items might be discussed together.

**Reference:**

O'Brien BC, Harris IB, Beckman TJ, Reed DA, Cook DA. **Standards for reporting qualitative research: a synthesis of recommendations.** *Academic Medicine*, Vol. 89, No. 9 / Sept 2014  
DOI: 10.1097/ACM.0000000000000388

For peer review only



# BMJ Open

## How can equitable video visit access be delivered in primary care? A qualitative study among rural primary care teams and patients

|                                 |                                                                                                                                                                                                                                                                                                                                                                                                                                                                                                                                                                    |
|---------------------------------|--------------------------------------------------------------------------------------------------------------------------------------------------------------------------------------------------------------------------------------------------------------------------------------------------------------------------------------------------------------------------------------------------------------------------------------------------------------------------------------------------------------------------------------------------------------------|
| Journal:                        | <i>BMJ Open</i>                                                                                                                                                                                                                                                                                                                                                                                                                                                                                                                                                    |
| Manuscript ID                   | bmjopen-2022-062261.R1                                                                                                                                                                                                                                                                                                                                                                                                                                                                                                                                             |
| Article Type:                   | Original research                                                                                                                                                                                                                                                                                                                                                                                                                                                                                                                                                  |
| Date Submitted by the Author:   | 27-Jun-2022                                                                                                                                                                                                                                                                                                                                                                                                                                                                                                                                                        |
| Complete List of Authors:       | Goldstein, Karen; Duke University, Perry, Kathleen R.; Vagelos College of Physicians & Surgeons<br>Lewinski, Allison ; Duke University<br>Walsh, Conor; Durham VA Health Care System; Duke University School of Medicine<br>Shepherd-Banigan, Megan E.; Durham Vet Affairs Med Ctr<br>Bosworth, HB; Duke University<br>Weidenbacher, Hollis; Durham VA Health Care System<br>Blalock, Dan ; Duke University,<br>Zullig, Leah; Durham Veterans Affairs Medical Center, Center for Health Services Research in Primary Care; Duke University, Department of Medicine |
| <b>Primary Subject Heading</b>: | General practice / Family practice                                                                                                                                                                                                                                                                                                                                                                                                                                                                                                                                 |
| Secondary Subject Heading:      | Communication, Patient-centred medicine                                                                                                                                                                                                                                                                                                                                                                                                                                                                                                                            |
| Keywords:                       | PRIMARY CARE, Telemedicine < BIOTECHNOLOGY & BIOINFORMATICS, GENERAL MEDICINE (see Internal Medicine)                                                                                                                                                                                                                                                                                                                                                                                                                                                              |
|                                 |                                                                                                                                                                                                                                                                                                                                                                                                                                                                                                                                                                    |

SCHOLARONE™  
Manuscripts



I, the Submitting Author has the right to grant and does grant on behalf of all authors of the Work (as defined in the below author licence), an exclusive licence and/or a non-exclusive licence for contributions from authors who are: i) UK Crown employees; ii) where BMJ has agreed a CC-BY licence shall apply, and/or iii) in accordance with the terms applicable for US Federal Government officers or employees acting as part of their official duties; on a worldwide, perpetual, irrevocable, royalty-free basis to BMJ Publishing Group Ltd ("BMJ") its licensees and where the relevant Journal is co-owned by BMJ to the co-owners of the Journal, to publish the Work in this journal and any other BMJ products and to exploit all rights, as set out in our [licence](#).

The Submitting Author accepts and understands that any supply made under these terms is made by BMJ to the Submitting Author unless you are acting as an employee on behalf of your employer or a postgraduate student of an affiliated institution which is paying any applicable article publishing charge ("APC") for Open Access articles. Where the Submitting Author wishes to make the Work available on an Open Access basis (and intends to pay the relevant APC), the terms of reuse of such Open Access shall be governed by a Creative Commons licence – details of these licences and which [Creative Commons](#) licence will apply to this Work are set out in our licence referred to above.

Other than as permitted in any relevant BMJ Author's Self Archiving Policies, I confirm this Work has not been accepted for publication elsewhere, is not being considered for publication elsewhere and does not duplicate material already published. I confirm all authors consent to publication of this Work and authorise the granting of this licence.

**Title:** How can equitable video visit access be delivered in primary care? A qualitative study among rural primary care teams and patients

**Running Title:** Clinical algorithm for video visit access

**Authors:** Karen M. Goldstein MD MSPH<sup>1,2</sup>, Kathleen R. Perry MS MDiv<sup>3</sup>, Allison Lewinski Ph.D.<sup>1,4</sup>, Conor Walsh MD <sup>1,2</sup>, Megan Shepherd-Banigan PhD<sup>1,5-6</sup>, Hayden B. Bosworth Ph.D. <sup>1,2,4-5, 7</sup>, Hollis Weidenbacher Ph.D.<sup>1</sup>, Dan V. Blalock Ph.D.<sup>1,7</sup>, Leah L. Zullig<sup>1,5</sup>

1. Center of Innovation to Accelerate Discovery and Practice Transformation, Durham VA Health Care System, Durham, NC 27705, USA
2. Division of General Internal Medicine, Duke University School of Medicine, Durham, NC
3. Columbia University, Vagelos College of Physicians & Surgeons, 630 W 168th St, New York, NY 10032
4. Duke University, School of Nursing, 307 Trent Drive, Durham, NC 27710
5. Duke University, Department of Population Health Sciences, 215 Morris Street, Durham, NC, 27701, USA
6. Duke-Margolis Center for Health Policy, 100 Fuqua Drive, Box 90120 Durham, NC 27708, USA
7. Duke University, Department of Psychiatry and Behavioral Sciences, 2213 Elba St, Durham, NC 27705, USA

**Corresponding Author:**

Karen M. Goldstein MD, MSPH  
508 Fulton Street  
Durham, NC 27705  
919.286.0411 ext 177764  
[Karen.goldstein@duke.edu](mailto:Karen.goldstein@duke.edu)

**Key Words:** virtual care, primary care, telemedicine, racial disparities, rural disparities

**Word Count:** 2993

**Abstract:**

**Objective:** The COVID-19 pandemic sparked exponential growth in video visit use in primary care. The rapid shift to virtual from in-person care exacerbates digital access disparities across racial groups and rural populations. Moving forward, it is critical to understand when and how to incorporate video visits equitably into primary care. We sought to develop a novel clinical algorithm to guide primary care clinics on how and when to employ video visits as part of care delivery.

**Design:** Qualitative data collection; 1 team member conducted all patient semi-structured interviews and led all focus groups with 4 other team members taking notes during groups

**Setting:** 3 rural primary care clinics

**Participants:** 24 Black veterans living in rural areas and 3 primary care teams caring for Black veterans living in rural areas

**Primary and secondary outcome measures:** Findings from semi-structured interviews with patients and focus groups with primary care teams.

**Results:** Key issues around appropriate use of video visits for clinical teams included having adequate technical support, encouraging engagement during video visits, and using video visits for appropriate clinical situations. Patients reported challenges with broadband access, inadequate equipment, concerns about the quality of video care, the importance of visit modality choice, and preferences for in-person care experience over virtual care. We developed an algorithm that requires input from both patients and their care team to assess fit for each clinical encounter.

1  
2  
3 **Conclusions:** Informed matching of patients and clinical situations to the right visit  
4  
5 modality, along with individual patient technology support could reduce virtual access  
6  
7 disparities.  
8  
9

10 **Trial registration:** NA  
11  
12  
13

## 14 **Article Summary**

### 15 **Strengths and Limitations of the study:**

- 16 1. Primary qualitative data collection from patients and care providers in the same  
17 clinical catchment area.
  - 18 2. Data collection centered on a historically under-resourced population to promote  
19 equitable clinical algorithm development.
  - 20 3. Stakeholder engagement in data collection tool development.
  - 21 4. Iterative development of clinical algorithm rooted in current clinical practice to  
22 facilitate readiness for implementation.
  - 23 5. Data collected from one geographic area and one health care system which may  
24 not translate to other regions or clinical settings.
  - 25 6. Data collected from Black veterans living in rural areas only and may not  
26 represent the experiences of other marginalized patient populations.
  - 27 7. Focus groups were conducted virtually which may have limited the participation  
28 of some individuals.
- 29  
30  
31  
32  
33  
34  
35  
36  
37  
38  
39  
40  
41  
42  
43  
44  
45  
46  
47  
48  
49  
50  
51  
52  
53  
54  
55  
56  
57  
58  
59  
60

## Introduction

The optimal role of video visits within primary care is undefined. With the onset of COVID-19, the need to stem potential viral transmission led to dramatic and rapid shifts from in-person to virtually-delivered care, including video-based care. Video offers assessment and communication advantages not possible with phone alone (e.g., visualizing a rash), may support better patient-provider rapport building [1], and receives higher remuneration from private insurers [2]. However, video-based care comes with distinct challenges for clinical teams (e.g., new clinic workflow) and patients (e.g., device access, technical literacy). In the absence of clear evidence, there is an urgent need to identify the right telehealth modality for the right clinical problem for the right patient at the right time [3].

Finding the optimal role for virtual primary care is particularly critical for historically marginalized and under-resourced populations. While telephone-delivered care may increase access to care[4], early findings show that when compared to phone-based care, systemically disadvantaged populations (e.g. older adults, those in rural or low bandwidth areas, racial and ethnic minorities, unhoused individuals) are less likely to engage in video visits [5] [6]. Compared to phone, access disparities were more pronounced with video visits due to requirements for digital literacy, higher cost, camera-ready phones or computers, and access to adequate bandwidth [5] [7] [8] [9] [10]. These findings underscore the structural determinants of telehealth disparities, including structural racism and unequal access to the internet [11] [12]. Addressing inequitable engagement in virtual care and related access disparities requires action at multiple levels from national policy to individual clinic practices.

1  
2  
3 Our objective was to develop a clinical algorithm to guide when and how to incorporate  
4 video visits into primary care delivery. For this algorithm to support equitable video visit  
5 access, we focused our data collection on patients who have historically experienced  
6 systemic healthcare access limitations. As the largest provider of US primary care and a  
7 national telehealth leader, the Department of Veterans Affairs Health Care System (VA)  
8 is an optimal setting to examine how to optimize virtual care delivery. Thus, we engaged  
9 populations at increased risk for low video uptake, specifically rural, Black veterans [6]  
10 [8] [13]

## 21 **Materials and Methods**

22 Data collection occurred among patients and clinical team members of VA outpatient  
23 primary care clinics in the Piedmont area of North Carolina which serve large  
24 populations of rural dwelling individuals. All study activities were reviewed and approved  
25 by the Durham VA Health Care System Institutional Review Board (IRB #02312). We  
26 followed COREQ guidelines for reporting of qualitative research where applicable [14].

27 Framework: We anchored our approach on the conceptualization of access developed  
28 by Fortney and colleagues [15]. This model emphasizes actual and perceived access to  
29 virtual and in-person care and guided our data collection materials (e.g., interview  
30 guides, matrix analysis, structured note templates), eligibility criteria (e.g., users, non-  
31 users), and debriefing sessions among the research team.

32 Setting: We defined rurality using Rural-Urban Communicating Areas (RUCA)  
33 consistent with the VA Office of Rural Health [16]. At the time of data collection, all  
34 clinics were providing in-person, telephone-based, and video-based care, though virtual

1  
2  
3 care, including video-based care, was encouraged across the VA health care system  
4  
5 due to the pandemic [17]. While there was some flexibility on use of approved  
6  
7 commercially available video-conference platforms during the early pandemic, the VA  
8  
9 primarily uses an internal VA platform for video-based care delivery.  
10  
11

12  
13 Patients: We conducted 26 semi-structured interviews with veterans who were identified  
14  
15 as Black in the electronic health record, who were engaged in VA health care (i.e.,  $\geq 1$   
16  
17 primary care visits within the prior 12 months) and lived in rural areas. Recruitment was  
18  
19 stratified by patients who had completed at least one video-based primary care  
20  
21 encounter (n=14) and those who had not (n=12). The research team contacted a subset  
22  
23 of potential participants via mailed letter in batches of 25 with purposive sampling of  
24  
25 Black veterans living in rural areas and then followed up by phone until the target  
26  
27 recruitment number was obtained and thematic saturation was reached. We obtained  
28  
29 verbal consent.  
30  
31  
32

33  
34 All interviews were conducted and recorded via WebEx (audio-only) between February-  
35  
36 May 2021 by a study team member (KP) who identifies as white and has training in  
37  
38 qualitative methodology. The interviewer listened to audio recordings and took  
39  
40 templated notes. To ensure reliability and validity, a second study team member (AL,  
41  
42 KG, LZ, MSB, CW) independently listened to interviews, reviewed, and amended  
43  
44 interviewer notes. Responses to each domain were summarized using matrix analysis  
45  
46 for participants stratified by previous video visit experience. Summary responses were  
47  
48 generated independently by two team members and reviewed by a third reviewer.  
49  
50  
51

52  
53 Patient and Public Involvement: The driving question for this project was developed in  
54  
55 response to trends in patient utilization of video-based care and the need to obtain  
56  
57  
58



1  
2  
3 patient preferences and experiences directly from the patients themselves. We received  
4  
5 consultation on our approach from the Durham VA Veteran Engagement Panel and the  
6  
7 Durham VA Health Care System Antiracism and Black Equity Advisory Board; however,  
8  
9 these individuals were not directly involved in the conduct of this work.  
10  
11

12  
13 Primary Care Teams: We invited all primary care team members from three VA primary  
14  
15 care clinics serving a single facility in the Piedmont area of North Carolina which cares  
16  
17 for a large population of Black, rural-dwelling population to participate in clinic specific  
18  
19 focus groups. We conducted four video-based focus groups across these three clinics  
20  
21 between December 2020 and February 2021 using WebEx video-conferencing platform.  
22  
23 Participants were encouraged to turn on their cameras if available and to make use of  
24  
25 the chat function. Focus groups were first given the opportunity to review and provide  
26  
27 feedback on a process map [18], an explicit step-by-step illustrative flow diagram of a  
28  
29 proposed approach to the incorporation of video-visits into primary care based on  
30  
31 existing workflow in our institution (see Appendix 1). Discussions followed the focus  
32  
33 group guide. Research team members (n=3) took notes during focus groups using  
34  
35 structured templates. A rapid qualitative approach and matrix method were used to  
36  
37 identify focus group themes [19] [20] [21]. Notes from the structured templates were  
38  
39 consolidated into matrices consistent with Fortney model domains. This matrix analysis  
40  
41 approach was paired with real-time iterative team-based analysis [22]. A subgroup of  
42  
43 team members (KP, KG, CW, AL, MSB, LZ) met virtually during data collection to  
44  
45 review domain level findings and identify implications for primary care video-based care  
46  
47 delivery.  
48  
49  
50  
51  
52  
53  
54  
55  
56  
57  
58  
59  
60

1  
2  
3 Virtual care algorithm generation: We based the initial algorithm structure on our  
4  
5 proposed process map of virtual care incorporation into primary care workflow  
6  
7 (Appendix 1) and standards for clinical algorithm development [23]. Working from  
8  
9 themes identified through patient interviews and clinical team focus group findings, we  
10  
11 evaluated potential overlap, conflict, and novelty related to needs and preferences for  
12  
13 when video-based visits are acceptable. After prioritizing patient safety and clinical  
14  
15 appropriateness, we reorganized the preliminary clinical algorithm to explicitly include  
16  
17 patient choice and preferences and to ensure their formal incorporation into clinic  
18  
19 workflow. (Figure 1). For example, from clinical focus groups, we added an initial step  
20  
21 to identify patients whose clinical characteristics would be more appropriate for a face-  
22  
23 to-face visit regardless of patient preference (e.g., patients with cognitive impairment).  
24  
25 Another example is adding assessment of patient preference for visit modality and need  
26  
27 for technical assistance as an explicit step before scheduling. This was based on patient  
28  
29 interview findings that there was great dissatisfaction when modality was assigned  
30  
31 rather than offered, and that the need for technical assistance was often a significant  
32  
33 barrier for patients. Our research team iteratively revised the algorithm and offered  
34  
35 clinical team focus group participants the opportunity to review it. Ultimately, our novel  
36  
37 algorithm seeks to guide whether video or an in-person care should be offered to a  
38  
39 specific patient with a given clinical situation, and informed by their existing technical  
40  
41 skills and equipment.  
42  
43  
44  
45  
46  
47  
48  
49

## 50 **Results**

51  
52 Focus group participants included physicians, advanced-practice providers,  
53  
54 administrative staff members, and nurses (n=38). Eleven of the 24 individuals who had  
55  
56  
57  
58  
59  
60

video visit experience reported receiving help to participate in the visit (Table 1).

Demographics of the interviewed patients are consistent with this patient population.

**Table 1. Characteristics of Patients Participating in Semi-structured Interviews**

|                               | Prior Video Visit<br>N = 14 | No Prior Video Visit<br>N = 12 |
|-------------------------------|-----------------------------|--------------------------------|
| Age, mean (SD)                | 64.50 (SD 9.00)             | 69.08 (8.69)                   |
| Gender*                       |                             |                                |
| Male                          | 11                          | 12                             |
| Female                        | 3                           | -                              |
| Tech self-efficacy †          | Mean=4                      | Mean=4.29                      |
| <3                            | 2                           | 2                              |
| 3-5                           | 12                          | 9                              |
| VA primary healthcare source  |                             |                                |
| Yes                           | 11                          | 11                             |
| No                            | -                           | 1                              |
| Not sure                      | 3                           | 1                              |
| Distance to closest VA        |                             |                                |
| 0-20 miles                    | 4                           | 5                              |
| 21-80 miles                   | 9                           | 6                              |
| missing                       | 1                           | 1                              |
| No. prior video visits        |                             |                                |
| 0 visits                      | -                           | 12                             |
| 1 visit                       | 2                           | -                              |
| 2-10 visits                   | 7                           | -                              |
| >10 visits                    | 5                           | -                              |
| No. prior telephone visits    |                             |                                |
| 0 visits                      | 2                           | 2                              |
| 1 visit                       | -                           | -                              |
| 2-10 visits                   | 7                           | 10                             |
| >10 visits                    | 5                           | -                              |
| Received help for video visit |                             |                                |
| Yes                           | 11                          | 1                              |
| No                            | 2                           | 10                             |
| Not sure                      | 1                           | 1                              |
| Device used for video visit   |                             |                                |
| iPhone                        | 5                           | -                              |
| Android phone                 | 5                           | -                              |
| Tablet                        | 2                           | -                              |
| Laptop or computer            | 2                           | -                              |
| Don't have any devices to use | 0                           | -                              |
| Reliable broadband            |                             |                                |
| Yes                           | 11                          | 6                              |
| No                            | 1                           | 5                              |

|                                                                                                                          |                      |                      |
|--------------------------------------------------------------------------------------------------------------------------|----------------------|----------------------|
| Not sure                                                                                                                 | 2                    | 1                    |
| Reliable device                                                                                                          |                      |                      |
| Yes                                                                                                                      | 12                   | 9                    |
| No                                                                                                                       | 2                    | 2                    |
| Not sure                                                                                                                 | 0                    | 1                    |
| Racism in health care (M across items, SD, # of respondents) ‡                                                           | 2.80 (1.17) for n=11 | 3.02 (0.72) for n=10 |
| Endorsed Agreement with:                                                                                                 |                      |                      |
| RHC 1: Doctors treat African American and White people the same. (N, %, # respondents)                                   | 2 (18.2%) of 11      | 7 (58.3%) of 12      |
| RHC 2: Racial discrimination in telehealth is common. (N, %, # respondents)                                              | 6 (50.0%) of 12      | 5 (50.0%) of 10      |
| RHC 3: In most hospitals, African American and Whites receive the same kind of telehealth care. (N, %, # respondents)    | 5 (41.6%) of 12      | 4 (36.4%) of 11      |
| RHC 4: African Americans can receive the telehealth care they want as equally as White people can. (N, %, # respondents) | 5 (38.5%) of 13      | 4 (36.4%) of 11      |
| Personal discrimination scale (M across items, SD) §                                                                     | 2.01 (0.75)          | 1.98 (0.77)          |
| Endorsed Experiencing:                                                                                                   |                      |                      |
| PDS 1: Treated with less courtesy than other people? (N, %, # respondents)                                               | 10 (71.4%) of 14     | 6 (60.0%) of 10      |
| PDS 2: Treated with less respect than other people? (N, %, # respondents)                                                | 11 (78.6%) of 14     | 7 (70.0%) of 10      |
| PDS 3: Received poorer services than other people? (N, %, # respondents)                                                 | 9 (69.2%) of 13      | 7 (70.0%) of 10      |
| PDS 4: Had a doctor or nurse act as if he or she thinks you were not smart? (N, %, # respondents)                        | 6 (42.9%) of 14      | 3 (30.0%) of 10      |
| PDS 5: Had a doctor or nurse act as if he or she was afraid of you? (N, %, # respondents)                                | 4 (28.6%) of 14      | 5 (50.0%) of 10      |
| PDS 6: Had a doctor or nurse act as if he or she was better than you? (N, %, # respondents)                              | 9 (64.3%) of 14      | 5 (55.6%) of 9       |
| PDS 7: Felt like a doctor or nurse was not listening to what you were saying? (N, %, # respondents)                      | 11 (78.6%) of 14     | 7 (70.0%) of 10      |
| Telehealth satisfaction scale (M across items, SD, # of respondents)                                                     | 1.83 (0.49) for n=13 | 2.02 (0.19) for n=9  |

\*as identified in chart

† Measure by response to the following question: How confident are you that you can complete the steps necessary that you identified above to attend a video visit with your provider on a scale of 1-5? One participant in the No prior Video Visit group did not provide an answer for this question.

‡ Racism in Healthcare measure (Hausmann et al[24]) agreement defined as marking "agree" or "strongly agree." Average score computed with item 2 reverse coded; range of possible score by question 1-5 with 1 = strongly disagree and 5 = strongly agree

§ Personal discrimination scale adapted from Everyday discrimination scale[25]; endorsement marked by any response other than "Never" for all questions; range of possible score by question 1-5 with 1 = never and 5 = always

1  
2  
3 Telehealth Satisfaction Scale (TeSS [17])[26] is a 10-item measure with with range of possible score by  
4 question from 1 to 3 with 1 = “excellent” and 3 = “Poor/fair”.

5 Scale scores for RHC, PDS, and TeSS only computed when all items were answered.

6 Patient interviews lasted from 25-45 minutes and focus groups from 45-60 minutes.

7  
8  
9 Below, we present themes from patients and clinical team data collection (Table 2).

## 10 11 12 **Patient Findings**

13  
14  
15 Perceived access to care: Most patients did not report personally experiencing or  
16  
17 witnessing others receiving differential access to care due to personal identity.

18  
19 However, several patients noted differential treatment around receipt of benefits, pain  
20  
21 medication, and appointment scheduling: “...*All my life, from the service part all the way*  
22  
23 *up to where [I am] today, I feel like I’ve had to fight for myself...*” (video-user). Reasons  
24  
25 for differential treatment were attributed to characteristics such as age, racial identity,  
26  
27 disability status, and/or a history of substance use disorder.

28  
29  
30  
31 Patients commonly reported challenges to video-based visits due to having inadequate  
32  
33 technical skills or a lack of access to needed equipment/broadband. Only half of  
34  
35 patients who had successfully completed video-based visits previously felt confident in  
36  
37 their ability to access video-based care in the future. For patients who did feel confident,  
38  
39 having a successful first video visit experience was reassuring. Among those without a  
40  
41 prior video visit, there were varying degrees of confidence: “*I’ve never used a computer,*  
42  
43 *so I’m a little shaky of it, you understand?... because if I get the thing and I don’t know*  
44  
45 *how to use it, that’s not worth a nickel... You hit one wrong button and you’re out of*  
46  
47 *business*” (video non-user).

48  
49  
50  
51  
52  
53 Satisfaction with care: Patients expressed multiple concerns about receiving care by  
54  
55 video. First, patients commonly reported perceptions that video visits were of lower  
56  
57

1  
2  
3 quality and more impersonal compared to in-person: *“Face to face makes it feel that I*  
4 *matter, that I’m important to the provider”* (video-user). Second, patients with and  
5 without prior video visits noted concerns about a provider’s ability to adequately assess  
6 medical concerns via video: *“They can’t make medical decisions without seeing you in*  
7 *the face, looking at your body”* (video-user). Third, many patients reported completing  
8 telephone-based visits and generally perceived phone-based visits to be lower quality  
9 than either in-person or video: *“it is hard to know on [the] phone [what the provider] is*  
10 *doing, whether they’re listening to you or understanding what you are saying. I’d prefer*  
11 *in-person visits, but video would be the next best thing”* (video non-user). Finally,  
12 patients wanted to choose whether to have their primary care encounter in-person or via  
13 video. Many patients reported being told that their visit would occur via video rather than  
14 being offered a choice. Some patients who had not completed video-based visits  
15 thought that they might feel more relaxed and less rushed at home: *“Very convenient if*  
16 *I’m going to stay on top of my health”* (video non-user).  
17  
18  
19  
20  
21  
22  
23  
24  
25  
26  
27  
28  
29  
30  
31  
32  
33  
34  
35

36 Preferences for care: While patients acknowledged the potential convenience of video-  
37 based care, most individuals still preferred in-person: *“given the conditions we face*  
38 *today [COVID-19 pandemic], I understand it. But my preference is in the office”* (video  
39 non-user). Reasons given for this preference centered on the full experience of in-  
40 person care: *“If it was up to me, I’d go to the VA. It is a form of release for me...It’s a*  
41 *way for me to get out of the house”* (video-user). In-person care also was noted to offer  
42 better eye contact, rapport building, communication, physical exam, and the opportunity  
43 to coordinate care. The majority of patients thought visit modality should be tied to  
44 clinical need. Most veterans preferred video for mental health, while in-person was  
45  
46  
47  
48  
49  
50  
51  
52  
53  
54  
55  
56  
57  
58  
59  
60

1  
2  
3 preferred for specific conditions, such as pain or urgent concerns. This preference  
4  
5 appears to be related to a sense that either the provider could not fully evaluate the  
6  
7 patient remotely or the patient could not fully communicate their concerns when not  
8  
9 face-to-face: *“They can see what’s going on and know if you’re having any difficulties.*  
10  
11 *On video, you have to stay in one position, they don’t know how you feel, you’re just*  
12  
13 *talking...in person, they can tell if you’re not genuine”* (video-user).  
14  
15  
16

### 17 **Clinical team member findings**

18  
19  
20 Perceived access to care: Clinical teams noted that digital connectivity issues frequently  
21  
22 present problems for accessing care. Specifically, video platform malfunctions consume  
23  
24 significant visit time. Additionally, many providers were unsatisfied with available  
25  
26 technology for video visits. Team members noted a diminished interpersonal connection  
27  
28 during video-based visits and that sometimes both parties (patients and clinicians) were  
29  
30 distracted or not fully engaged. Difficulty engaging with certain patients via video was  
31  
32 particularly problematic – specifically those with cognitive, significant sensory, or  
33  
34 functional impairments. One strategy used to overcome technical barriers was having a  
35  
36 family member or friend provide logistical support during a video visit. Overall, clinical  
37  
38 teams reported that patients living in rural areas and older patients had the most  
39  
40 difficulty engaging in video-based care due to limited availability of and comfort with  
41  
42 technology.  
43  
44  
45  
46  
47  
48

49 Satisfaction with care: Clinicians felt that video visits were inadequate for certain  
50  
51 situations and often scheduled without regard to clinical appropriateness of the  
52  
53 modality. Management of chronic condition (e.g., hypertension) was given as a specific  
54  
55 example that could be appropriate for video, as were dermatologic conditions, mental  
56  
57  
58  
59  
60

1  
2  
3 health, and non-traumatic single joint pain. Clinical conditions not appropriate for video  
4  
5 would include new patient visits, patients with cognitive impairment, or new conditions.  
6  
7

8 Preferences for care: Clinicians expressed frustration when video-based care did not  
9  
10 align with the patient's clinical problem. In addition, teams noted a significant need for  
11  
12 streamlining the clinic workflow process which was felt to be designed for in-person  
13  
14 visits and not conducive to virtual care. For example, due to in-person clinic demands,  
15  
16 no one contacts patients in advance to verify that they have a working link for the video  
17  
18 visit and that they are 'checked-in' online before an appointment.  
19  
20  
21

## 22 **Clinical algorithm**

23  
24 We identified three key decision points for matching a specific patient to a particular  
25  
26 modality for an encounter. First, it is important to determine if the patient and their  
27  
28 health concerns are clinically appropriate for video; second, patients need to agree to  
29  
30 video modality use; third, patients need to be assessed for readiness for video visits  
31  
32 (e.g., having accessible technology, adequate technical skills). These decision points  
33  
34 seem to be implied in the existing primary care processes, but were not explicit or  
35  
36 consistently applied. We combined these decision points into one ready-to-implement  
37  
38 algorithm to clearly link the importance of both clinical appropriateness and patient  
39  
40 readiness. Initially, the algorithm prompts clinical consideration of the appropriateness  
41  
42 of a patient's current clinical concern for visit modality type (see Figure 2). Once a  
43  
44 patient situation is deemed clinically appropriate for video-based care, the algorithm  
45  
46 then requires a patient's response regarding interest in video-based care. Note that the  
47  
48 algorithm does not specify who is responsible for making this determination. This is  
49  
50 because we anticipate that it could be managed by different clinical roles (e.g.,  
51  
52  
53  
54  
55  
56  
57  
58  
59  
60



1  
2  
3 physician, advanced practice provider, nurse care manager) depending on a given  
4  
5 clinic's resources and capacity. If the patient is interested in a video visit, the algorithm  
6  
7 proceeds to incorporate what equipment and technological support are needed in  
8  
9 advance of the video appointment. Also identified through the integration of patient and  
10  
11 clinical team findings were key patient video visit preparation steps (Table 3).  
12  
13  
14 Importantly, it is possible that the provider would determine that an in-person visit is still  
15  
16 necessary after a video-based visit, though the expectation and goal would be for this to  
17  
18 be rare.  
19  
20  
21  
22  
23  
24  
25  
26  
27  
28  
29  
30  
31  
32  
33  
34  
35  
36  
37  
38  
39  
40  
41  
42  
43  
44  
45  
46  
47  
48  
49  
50  
51  
52  
53  
54  
55  
56  
57  
58  
59  
60

**Table 2. Clinician and patient experiences with primary care video visits**

| Domain                               | Patient                                                                                                                                                                                                                                                                                                                                                                              | Clinical Team                                                                                                                                                                                                                                                                                                                                                                                                                                                             | Implications for clinical algorithm                                                                                                                                                                                                                                                                                                                                                                                                                                                                          |
|--------------------------------------|--------------------------------------------------------------------------------------------------------------------------------------------------------------------------------------------------------------------------------------------------------------------------------------------------------------------------------------------------------------------------------------|---------------------------------------------------------------------------------------------------------------------------------------------------------------------------------------------------------------------------------------------------------------------------------------------------------------------------------------------------------------------------------------------------------------------------------------------------------------------------|--------------------------------------------------------------------------------------------------------------------------------------------------------------------------------------------------------------------------------------------------------------------------------------------------------------------------------------------------------------------------------------------------------------------------------------------------------------------------------------------------------------|
| Perceived access to video-based care | <ul style="list-style-type: none"> <li>Some experiences of differential treatment by personal identity in health care setting</li> <li>Barriers: Technical skills and equipment, lack of confidence</li> <li>Scheduling generally easy</li> </ul>                                                                                                                                    | <ul style="list-style-type: none"> <li>Video platform malfunctions take up valuable clinical time</li> <li>Diminished interpersonal connection with patients</li> <li>Not appropriate for patients with specific limitations (e.g. cognitive impairment, significant sensory impairment)</li> <li>Rural dwelling and older adults had most difficulty accessing video visits</li> <li>First video visit was the hardest</li> <li>Family friends can be helpful</li> </ul> | <ul style="list-style-type: none"> <li>Clinical team training to optimize interpersonal rapport via video</li> <li>Clinical triage for video visit appropriateness</li> <li>Offer all patients opportunity to practice video visits prior to scheduled appointment, especially before first visit</li> <li>Encourage patient to recruit family/friends for assistance</li> <li>Assess patient preparedness for video visit (including broadband access, equipment, technical literacy)</li> </ul>            |
| Satisfaction with video-based care   | <p>Negative aspects of video visits:</p> <ul style="list-style-type: none"> <li>Impersonal</li> <li>Inadequate for quality medical care</li> <li>Providers distracted</li> <li>Technical barriers</li> </ul> <p>Positive aspects of video visits:</p> <ul style="list-style-type: none"> <li>More relaxed</li> <li>Less rushed</li> <li>Desired choice for visit modality</li> </ul> | <ul style="list-style-type: none"> <li>Video inadequate for some clinical presentations</li> <li>Video not appropriate for new patient visits</li> </ul>                                                                                                                                                                                                                                                                                                                  | <ul style="list-style-type: none"> <li>Transparency with patients about when video is appropriate and why it is being offered</li> <li>Use same approach regarding modality choice for all patients</li> <li>Enlist technical support for troubleshooting</li> <li>Establish a back-up plan for connection in advance of appointment (e.g. alternate video platforming, telephone)</li> <li>Prepare patients for optimal engagement</li> <li>Give patients choice of participating in video visit</li> </ul> |
| Attitudes towards video-based care   | <ul style="list-style-type: none"> <li>Many preferred in-person despite convenience of video</li> <li>In-person care perceived as better than video</li> </ul>                                                                                                                                                                                                                       | <ul style="list-style-type: none"> <li>Frustrated when modality choice made without consideration for clinical appropriateness</li> </ul>                                                                                                                                                                                                                                                                                                                                 | <ul style="list-style-type: none"> <li>Allow in-person as per patient preference</li> <li>Adapt clinic team workflow to support multi-modality clinical care</li> </ul>                                                                                                                                                                                                                                                                                                                                      |

- Appeal of ritual of in-person care
- Video not always best for patient needs

- Need for clinic workflows to adapt to virtual care requirements
- Management of video-based visit needs should not fall solely on providers

- Interdisciplinary collaboration around video visit workflow

For peer review only

**Table 3. Patient teaching points before a video visit**

| Patient Teaching Before Video Visit                       |                                                   |                                                                                                                       |
|-----------------------------------------------------------|---------------------------------------------------|-----------------------------------------------------------------------------------------------------------------------|
| At Scheduling                                             | In Advance of Visit                               | During a Visit                                                                                                        |
| Explain when video visit is appropriate                   | Prepare for visit as you would an in-person visit | Limit distractions                                                                                                    |
| Explain that clinical team will determine appropriateness | Join video platform at least 15 minutes early     | Do not multi-task during visit (e.g., do not clean house)                                                             |
| Give patients a choice                                    | Ensure visual and auditory privacy                | Do not drive during video visit                                                                                       |
|                                                           | Recruit a family member to help                   | Be aware that your provider may at times not be making eye contact while looking at medical record on a second screen |
|                                                           | Create a back-up plan                             |                                                                                                                       |

## Discussion

We identified patient and primary care team experiences with video visits across key dimensions of telehealth access and used our findings to develop a novel algorithm to guide the incorporation of equitable video visits into primary care. Consistent with previous literature, we confirmed that clinicians have concerns about technology malfunction, inadequate technical support, and recognize the importance of having a family or friend available before and during a visit to assist with the patient's technology [27] [28] [29]. Our study provides new insight in virtual care use. We found that patients are concerned with quality of video-based care, prefer to have choice of visit modality, and place personal value on in-person experience despite convenience costs.

1  
2  
3 Our intention was to develop an algorithm that could support equitable access to virtual  
4 care; however, we did not identify a consistent pattern about which patients would  
5 prefer video-based care. Thus, we incorporated features intended to promote equity in  
6  
7  
8 prefer video-based care. Thus, we incorporated features intended to promote equity in  
9  
10 access to video-based care: 1) emphasized the importance of using this algorithm with  
11  
12 all patients to avoid implicit bias regarding who may or may not want a video visit and  
13  
14 and/or need technological support; 2) underscored patient choice regarding visit  
15  
16 modality when possible; 3) identified actions to promote optimal patient engagement  
17  
18 during a video visit; and 4) recognized clinician behaviors that promote trustworthiness  
19  
20 and transparency during video-based encounters. One concern raised by some veteran  
21  
22 participants was that if a video-based visit was completed and that either the patient or  
23  
24 their provider wanted an in-person follow-up visit, that the opportunity for that in-person  
25  
26 visit might be lost. In fact, one type of visit does not preclude the other. While clinical  
27  
28 encounters that are conducted virtually may later require an in-person evaluation (e.g.,  
29  
30 due to patient preference or change in clinical indication), it is unknown how frequently  
31  
32 this is likely to occur. Also unknown is the optimal timing and frequency of an in-person  
33  
34 follow-up visit after video-based care. As this has important implications the patient  
35  
36 experience, patient outcomes, and health system resource use, exploration of this  
37  
38 outcome will be important for future research. In addition, we acknowledge that there  
39  
40 are other existing approaches for choosing visit modality[30]. However, existing guides  
41  
42 generally have not systematically incorporated the patient perspective in visit modality  
43  
44 choice[31] [32]. Our algorithm purposively centers on the patient, as well as on the  
45  
46 patient-provider dyad, through careful consideration of a patient's preferences and their  
47  
48 experiences with telehealth, particularly tailored to patients from historically under-  
49  
50  
51  
52  
53  
54  
55  
56  
57  
58  
59  
60

1  
2  
3 resourced populations. This is a population who have traditionally suffered from  
4 inequities in access to traditional in-person care and are at risk for similar challenges in  
5 accessing video-based care. Our algorithm proactively addresses this at a time when  
6 video-based care is on a precipitous rise.  
7  
8  
9  
10  
11

12  
13 We also identified that both patients and clinicians expressed concerns about the  
14 impact of video visits on patient-provider relationship and subsequent clinical care  
15 quality. In particular, patients expressed misgivings about quality of care received via  
16 video. While the importance of patient confidence in virtual care has been previously  
17 noted [33] [34], our study adds that this may not be true for all types of care or at all  
18 points in the care continuum. Similar to patients, clinicians commonly described  
19 concerns about the interpersonal quality of virtual clinical interactions, especially around  
20 building rapport with new patients [35] and loss of body language and social cues [36]  
21 [37]. Strategies to improve the virtual care experience including improving accessibility  
22 through access to closed captioning and language interpretation [38], incorporation of  
23 trauma-informed care principles such as transparency during visit actions and  
24 maintaining good eye contact [38] [39], and adequate technology training for patients  
25 and clinical teams [27] [40]. Together with previous findings, our work points to the need  
26 for an intentional approach to the implementation of high-quality, equitable, patient-  
27 centered video-based care.  
28  
29  
30  
31  
32  
33  
34  
35  
36  
37  
38  
39  
40  
41  
42  
43  
44  
45  
46

47  
48 This research has limitations. First, our clinical support algorithm was informed by  
49 qualitative data from clinical teams in rural North Carolina and Black veterans residing in  
50 rural areas. However, it may be applicable to other rural, minoritized patients using  
51 virtual care in other health care systems with similar reimbursement pressures. Second,  
52  
53  
54  
55  
56  
57  
58  
59  
60

1  
2  
3 we focused on the context of primary care and, thus, the algorithm may not be relevant  
4  
5 to specialty care. For example, specialty clinics typically provide care for individual  
6  
7 conditions or organ systems for which it may be easier to predict clinical  
8  
9 appropriateness of video-based care. Third, we focused this algorithm on the choice  
10  
11 between video-based visits vs care delivered in-person because health care system and  
12  
13 insurance reimbursement policies have generally favored video-based care and not  
14  
15 phone-based care. We acknowledge that telephone-based care has been recognized  
16  
17 as an important modality for maintaining access to care, especially for patients with  
18  
19 limited access to broadband services. However, as our work focused on video versus  
20  
21 face-to-face care based on what services were anticipated to remain reimbursable post-  
22  
23 pandemic, we did not collect data about how and when phone should fit into visit  
24  
25 modality decisions. Within the VA health care system, there is no differential  
26  
27 reimbursement for telephone-based care, video-based care, and in-person care. This  
28  
29 may limit generalizability of our algorithm into other health care systems that may have  
30  
31 a financial driver that could usurp patient and/or provider preference. Fourth, the  
32  
33 interviewer for both the focus groups and the patient interviews identifies as white,  
34  
35 which may have influenced participant willingness to disclose racial discrimination  
36  
37 experiences. Our center has made a focused effort to hire and train diverse qualitative  
38  
39 staff since the conclusion of this work. Finally, determinants of access to health care  
40  
41 expand beyond clinic level policies and actions thus broader innovation and changes  
42  
43 will be required to address access disparities.  
44  
45  
46  
47  
48  
49  
50

## 51 **Conclusions**

52  
53  
54  
55  
56  
57  
58  
59  
60

1  
2  
3 Optimal and equitable incorporation of video visits into primary care delivery requires  
4 thoughtful planning and potential re-working of clinic workflow. Assessment of clinical  
5 appropriateness of a virtual modality as well as patient preference and technological  
6 readiness are crucial before each visit. Next steps for this work include evaluating the  
7 feasibility of our algorithm in a primary care practice and validating measures to assess  
8 patient interest in video visits. It will be critical to identify determinants of video visit  
9 uptake and areas needing adaptation for site specific characteristics. Informed matching  
10 of patients and clinical situations to the right visit modality, along with individual patient  
11 technology support, could contribute to broader virtual access disparities.  
12  
13  
14  
15  
16  
17  
18  
19  
20  
21  
22  
23

## 24 **Figure Legend**

25  
26  
27 **Figure 1. Algorithm Development Process**

28  
29  
30 **Figure 2. Clinical Support Algorithm for Incorporation of Video Visits into Primary**  
31 **Care Workflow**

32  
33  
34  
35 **Appendix. Process Map of Pre-existing Primary Care Workflow for Incorporation**  
36 **of Video-Based Care**  
37  
38  
39  
40  
41  
42  
43

44 **Prior Presentations:** Partial findings from this project were presented at the 2021  
45 Dissemination and Implementation Virtual Conference.  
46  
47  
48

49 **Contributorship Statement:** KMG co-conceptualized this project, participated in data  
50 collection, analysis and interpretation, and drafted this work; KRP developed data  
51 collection and analysis plan, collected the data, contributed to analysis, and edited the  
52  
53  
54  
55  
56  
57  
58  
59  
60



1  
2  
3 manuscript; AL, CW, and MSB participated in data collection, analysis and  
4  
5 interpretation, and edited the manuscript; HBB contributed to conceptualization,  
6  
7 interpretation, and edited this manuscript. HW supported data collection and analysis  
8  
9 and edited this manuscript; DVB contributed to data analysis, interpretation and edited  
10  
11 this manuscript. LLZ co-conceptualized this project, participated in data collection,  
12  
13 analysis and interpretation, and drafted this work.  
14  
15

16  
17 **Competing interests:** The content and views expressed here are solely those of the  
18  
19 authors and do not reflect those of the U.S. Federal Government. Dr. Lewinski reports  
20  
21 receiving funds from PhRMA Foundation and Otsuka. Hayden Bosworth reports  
22  
23 research funding through his institution from BeBetter therapeutics, Boehringer  
24  
25 Ingelheim, Improved Patient Outcomes, Merck, NHLBI, Novo Nordisk, Otsuka, Sanofi,  
26  
27 VA. He also provides consulting services for Abbott, Novartis, Sanofi, Vidya, Walmart,  
28  
29 Webmed. He is also on the board of directors of Preventric Diagnostics. Dr. Zullig  
30  
31 reports research funding awarded to her institution from the PhRMA Foundation and  
32  
33 Proteus Digital Health, as well as consulting for Pfizer and Novartis, all unrelated to the  
34  
35 current work.  
36  
37  
38  
39  
40

41 **Funding:** This work received funding from the VA Access Research Consortium (no  
42  
43 funding number given) and was supported by the Durham Center of Innovation to  
44  
45 Accelerate Discovery and Practice Transformation (ADAPT), (CIN 13-410) at the  
46  
47 Durham VA Health Care System. Dr. Lewinski was supported by VA HSR&D grants  
48  
49 #18-234, Drs. Shepherd-Banigan and Blalock by VA HSR&D Career Development  
50  
51 Award (CDA #17-006 and #19-035 respectively), and Dr. Walsh by VA OAA VA Quality  
52  
53 Scholars Fellowship Program (AF-3Q-05-2019-C).  
54  
55  
56  
57  
58  
59  
60

**Data sharing statement:** Due to institutional privacy agreements, authors are unable to share data used for this work.

**Acknowledgements:** We would like to thank Dr. Gene Oddone for this early support of this project. We would also like to thank the ADAPT TeleFAR workgroup, the Durham Veteran Engagement Panel, and the Durham VA Health Care System Antiracism and Black Equity Advisory Board for consultation during development of this project. Additionally, we thank Eric Monson for data visualization consultation and Sharon Thompson for editorial assistance.

**Ethics Statement:** This work was reviewed and approved by the Durham VA Institutional Review Board. All co-authors declare no conflicts of interest.

## References

1. Elliott, T., et al., *Beyond Convenience: Patients' Perceptions of Physician Interpersonal Skills and Compassion via Telemedicine*. Mayo Clin Proc Innov Qual Outcomes, 2020. **4**(3): p. 305-314.
2. Centers for Medicare & Medicaid Services. *Medicare Telemedicine Health Care Provider Fact Sheet*. 2021 March 17, 2020 [cited 2021 12/03/21]; Available from: <https://www.cms.gov/newsroom/fact-sheets/medicare-telemedicine-health-care-provider-fact-sheet>.
3. Lewinski, A.A., et al., *Accelerating Implementation of Virtual Care in an Integrated Health Care System: Future Research and Operations Priorities*. J Gen Intern Med, 2021.
4. Pagán, V.M., K.S. McClung, and C.J. Peden, *An Observational Study of Disparities in Telemedicine Utilization in Primary Care Patients Before and During the COVID-19 Pandemic*. Telemed J E Health, 2021.
5. Poeran, J., et al., *Pre-existing Disparities and Potential Implications for the Rapid Expansion of Telemedicine in Response to the Coronavirus Disease 2019 Pandemic*. Med Care, 2021. **59**(8): p. 694-698.
6. Lam, K., et al., *Assessing Telemedicine Unreadiness Among Older Adults in the United States During the COVID-19 Pandemic*. JAMA Intern Med, 2020. **180**(10): p. 1389-1391.
7. Roberts, E.T. and A. Mehrotra, *Assessment of Disparities in Digital Access Among Medicare Beneficiaries and Implications for Telemedicine*. JAMA Intern Med, 2020. **180**(10): p. 1386-1389.

- 1
- 2
- 3
- 4
- 5
- 6
- 7
8. Ferguson, J.M., et al., *Virtual care expansion in the Veterans Health Administration during the COVID-19 pandemic: clinical services and patient characteristics associated with utilization*. J Am Med Inform Assoc, 2021. **28**(3): p. 453-462.
9. Luo, J., et al., *Telemedicine Adoption during the COVID-19 Pandemic: Gaps and Inequalities*. Appl Clin Inform, 2021. **12**(4): p. 836-844.
10. Rodriguez, J.A., et al., *Differences in the use of telephone and video telemedicine visits during the COVID-19 pandemic*. Am J Manag Care, 2021. **27**(1): p. 21-26.
11. Hilbert, M., *The end justifies the definition: The manifold outlooks on the digital divide and their practical usefulness for policy-making*. Telecommunications Policy, 2011. **35**(8): p. 715-736.
12. Pew Research Center. *Internet/Broadband Fact Sheet*. 2021 [cited 2021 12/03/21]; Available from: <https://www.pewresearch.org/internet/fact-sheet/internet-broadband/>.
13. Pierce, R.P. and J.J. Stevermer, *Disparities in use of telehealth at the onset of the COVID-19 public health emergency*. J Telemed Telecare, 2020: p. 1357633x20963893.
14. Tong, A., P. Sainsbury, and J. Craig, *Consolidated criteria for reporting qualitative research (COREQ): a 32-item checklist for interviews and focus groups*. Int J Qual Health Care, 2007. **19**(6): p. 349-57.
15. Fortney, J.C., et al., *A re-conceptualization of access for 21st century healthcare*. J Gen Intern Med, 2011. **26 Suppl 2**(Suppl 2): p. 639-47.
16. Department of Veteran Affairs. *Rural Veterans*. 2021 [cited 2021 12/03/21]; Available from: <https://www.ruralhealth.va.gov/aboutus/ruralvets.asp>.
17. Administration, V.H., *COVID-19 Response Plan*, O.o.E. Management, Editor. 2020.
18. Heher Y, ChenY., *Process Mapping: A Cornerstone of Quality Improvement, in Cancer Cytopathology*. 2017.
19. Lewinski, A.A., et al., *Applied Rapid Qualitative Analysis to Develop a Contextually Appropriate Intervention and Increase the Likelihood of Uptake*. Med Care, 2021. **59**(Suppl 3): p. S242-s251.
20. Lewinski, A.A., et al., *Veterans' Interpretation of Diabetes Distress in Diabetes Self-Management: Findings From Cognitive Interviews*. Sci Diabetes Self Manag Care, 2021. **47**(5): p. 391-403.
21. Nevedal, A.L., et al., *Rapid versus traditional qualitative analysis using the Consolidated Framework for Implementation Research (CFIR)*. Implement Sci, 2021. **16**(1): p. 67.
22. Patton, M., *Qualitative research & evaluation methods: Integrating theory and practice*. 2014: Sage Publications.
23. *Proposal for clinical algorithm standards*. Society for Medical Decision Making Committee on Standardization of Clinical Algorithms. Med Decis Making, 1992. **12**(2): p. 149-54.
24. Hausmann, L.R., et al., *Perceived racial discrimination in health care and its association with patients' healthcare experiences: does the measure matter?* Ethn Dis, 2010. **20**(1): p. 40-7.

- 1
  - 2
  - 3
  - 4
  - 5
  - 6
  - 7
  - 8
  - 9
  - 10
  - 11
  - 12
  - 13
  - 14
  - 15
  - 16
  - 17
  - 18
  - 19
  - 20
  - 21
  - 22
  - 23
  - 24
  - 25
  - 26
  - 27
  - 28
  - 29
  - 30
  - 31
  - 32
  - 33
  - 34
  - 35
  - 36
  - 37
  - 38
  - 39
  - 40
  - 41
  - 42
  - 43
  - 44
  - 45
  - 46
  - 47
  - 48
  - 49
  - 50
  - 51
  - 52
  - 53
  - 54
  - 55
  - 56
  - 57
  - 58
  - 59
  - 60
25. Williams, D.R., et al., *Racial Differences in Physical and Mental Health: Socio-economic Status, Stress and Discrimination*. J Health Psychol, 1997. **2**(3): p. 335-51.
26. Morgan, D.G., et al., *The telehealth satisfaction scale: reliability, validity, and satisfaction with telehealth in a rural memory clinic population*. Telemed J E Health, 2014. **20**(11): p. 997-1003.
27. Barkai, G., et al., *Patient and clinician experience with a rapidly implemented large-scale video consultation program during COVID-19*. Int J Qual Health Care, 2021. **33**(1).
28. Barsom, E.Z., et al., *Emergency upscaling of video consultation during the COVID-19 pandemic: Contrasting user experience with data insights from the electronic health record in a large academic hospital*. Int J Med Inform, 2021. **150**: p. 104463.
29. Heyworth, L., Kirsh, S., Zulman, D., Ferguson, J., Kizer, K. , *Expanding Access through Virtual Care: The VA's Early Experience with Covid-19*. N Engl J Med, 2020.
30. Croymans D, Hurst I., Han M, *Telehealth: The Right Care, at the Right Time, via the Right Medium*. NEJM, 2020.
31. Bhatt, A.B. *A Hybrid Model of In-person and Telemedicine Visits Facilitates Longitudinal Care Delivery*. 2021; June 6, 2022]; Available from: <https://advances.massgeneral.org/cardiovascular/article.aspx?id=1334>.
32. Victorian Government, *Telehealth Decision Tool*. 2020; June 6, 2022; Available from: <https://www.safercare.vic.gov.au/sites/default/files/2020-11/Telehealth%20decision%20tool.pdf>
33. Lopez, A.M., Lam K., & Thota, R., *Barriers and Facilitators to Telemedicine: Can You Hear Me Now?* Am Soc Clin Oncol Educ Book, 2021. **41**: p. 25-36.
34. Gordon, H.S., et al., *"I'm Not Feeling Like I'm Part of the Conversation" Patients' Perspectives on Communicating in Clinical Video Telehealth Visits*. J Gen Intern Med, 2020. **35**(6): p. 1751-1758.
35. Ramaswamy, A., et al., *Patient Satisfaction With Telemedicine During the COVID-19 Pandemic: Retrospective Cohort Study*. J Med Internet Res, 2020. **22**(9): p. e20786.
36. Gomez, T., et al., *A Qualitative Study of Primary Care Physicians' Experiences With Telemedicine During COVID-19*. J Am Board Fam Med, 2021. **34**(Suppl): p. S61-s70.
37. Srinivasan, M., et al., *Qualitative Assessment of Rapid System Transformation to Primary Care Video Visits at an Academic Medical Center*. Ann Intern Med, 2020. **173**(7): p. 527-535.
38. Presley C, H.A., Warnick J, *Diabetes SIG How to Prepare for your Telemedicine Appointment*. 2021.
39. Gerber, M.R., et al., *Trauma-Informed Telehealth in the COVID-19 Era and Beyond*. Fed Pract, 2020. **37**(7): p. 302-308.
40. Alkureishi, M.A., et al., *Clinician Perspectives on Telemedicine: Observational Cross-sectional Study*. JMIR Hum Factors, 2021. **8**(3): p. e29690.

Patient seeking primary care clinical visit

**Initiate Clinical Triage**

- Does patient require urgent, in-person evaluation (eg, altered mental status, difficulty breathing, chest pain)?

Yes

Refer for emergent care

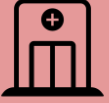

No

**Consider Patient Factors**

- Is patient new to clinic/provider?
- Does the patient have cognitive impairment?
- Does patient have sensory impairment (significant hearing loss or visual impairment)?

Yes

Schedule in-person visit

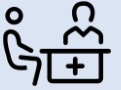

No

**Continue Clinical Triage**

- Is the patient's concern a chronic medical issue?
- Has the patient's concern been identified as appropriate for video-based evaluation (see inset box below)?

No

Schedule in-person visit

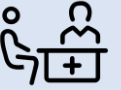

Yes

**Assess video access and interest**

- Is patient interested in conducting visit by video?
- Does patient have video-capable equipment?
- Does patient have access to high-speed internet or broadband?
- Does patient have access to location with auditory and visual privacy?

No

Schedule in-person visit

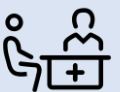

Yes

**Assess need for technical assistance**

- Has patient successfully completed a previous video-based visit on current platform?
- Does patient have family or friends that could assist with technology?

Yes

Schedule video visit

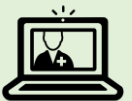

No

Schedule for video-based visit and encourage patient to conduct test video-visit call

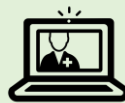

Examples of conditions likely appropriate for video-based care:

- Chronic diabetes or hypertension management
- New rash
- Single joint, non-traumatic pain
- Follow up from urgent care for low complexity issues

## Patients Semi-structured Interviews

### Purpose:

- Obtain patient experiences and perceptions of video-based primary care
- Center data collection on patient population which has historically experienced systemic healthcare access barriers

### Participants

Rural-dwelling, African-American veterans with at least one primary care visit in the last 12 months

### Questions guided by:

Fortney conceptualization of access to care (e.g., perceived access to care, satisfaction with care)

### Overall goal:

To develop an equitable, patient/clinician centered algorithm to optimize the use of video-visits in primary care



- Integration of findings from both samples with direct implications for when and how to incorporate video visits into primary care delivery
- Findings were organized across common themes and compared to identify ideal balance across patient/clinician perspectives of use of video visits.
- Development and iterative review of algorithm building on existing clinic workflows

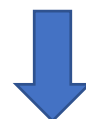

Developed algorithm to support incorporation of video visits into primary care delivery

## Primary Care Team Focus Groups

### Purpose:

- Obtain clinical team experiences and perceptions of delivery care via video-visits
- Solicit clinically appropriate role for and incorporation of video visits in primary care delivery

### Participants

Multi-disciplinary primary care team members serving large rural population in the Southeastern US

### Questions guided by:

Process map of existing workflow for video visits; Fortney conceptualization of access to care (e.g., digital connectivity, quality of interpersonal experience)



1  
2  
3  
4  
5  
6  
7  
8  
9  
10  
11  
12  
13  
14  
15  
16  
17  
18  
19  
20  
21  
22  
23  
24  
25  
26  
27  
28  
29  
30  
31  
32  
33  
34  
35  
36  
37  
38  
39  
40  
41  
42  
43  
44  
45  
46  
47

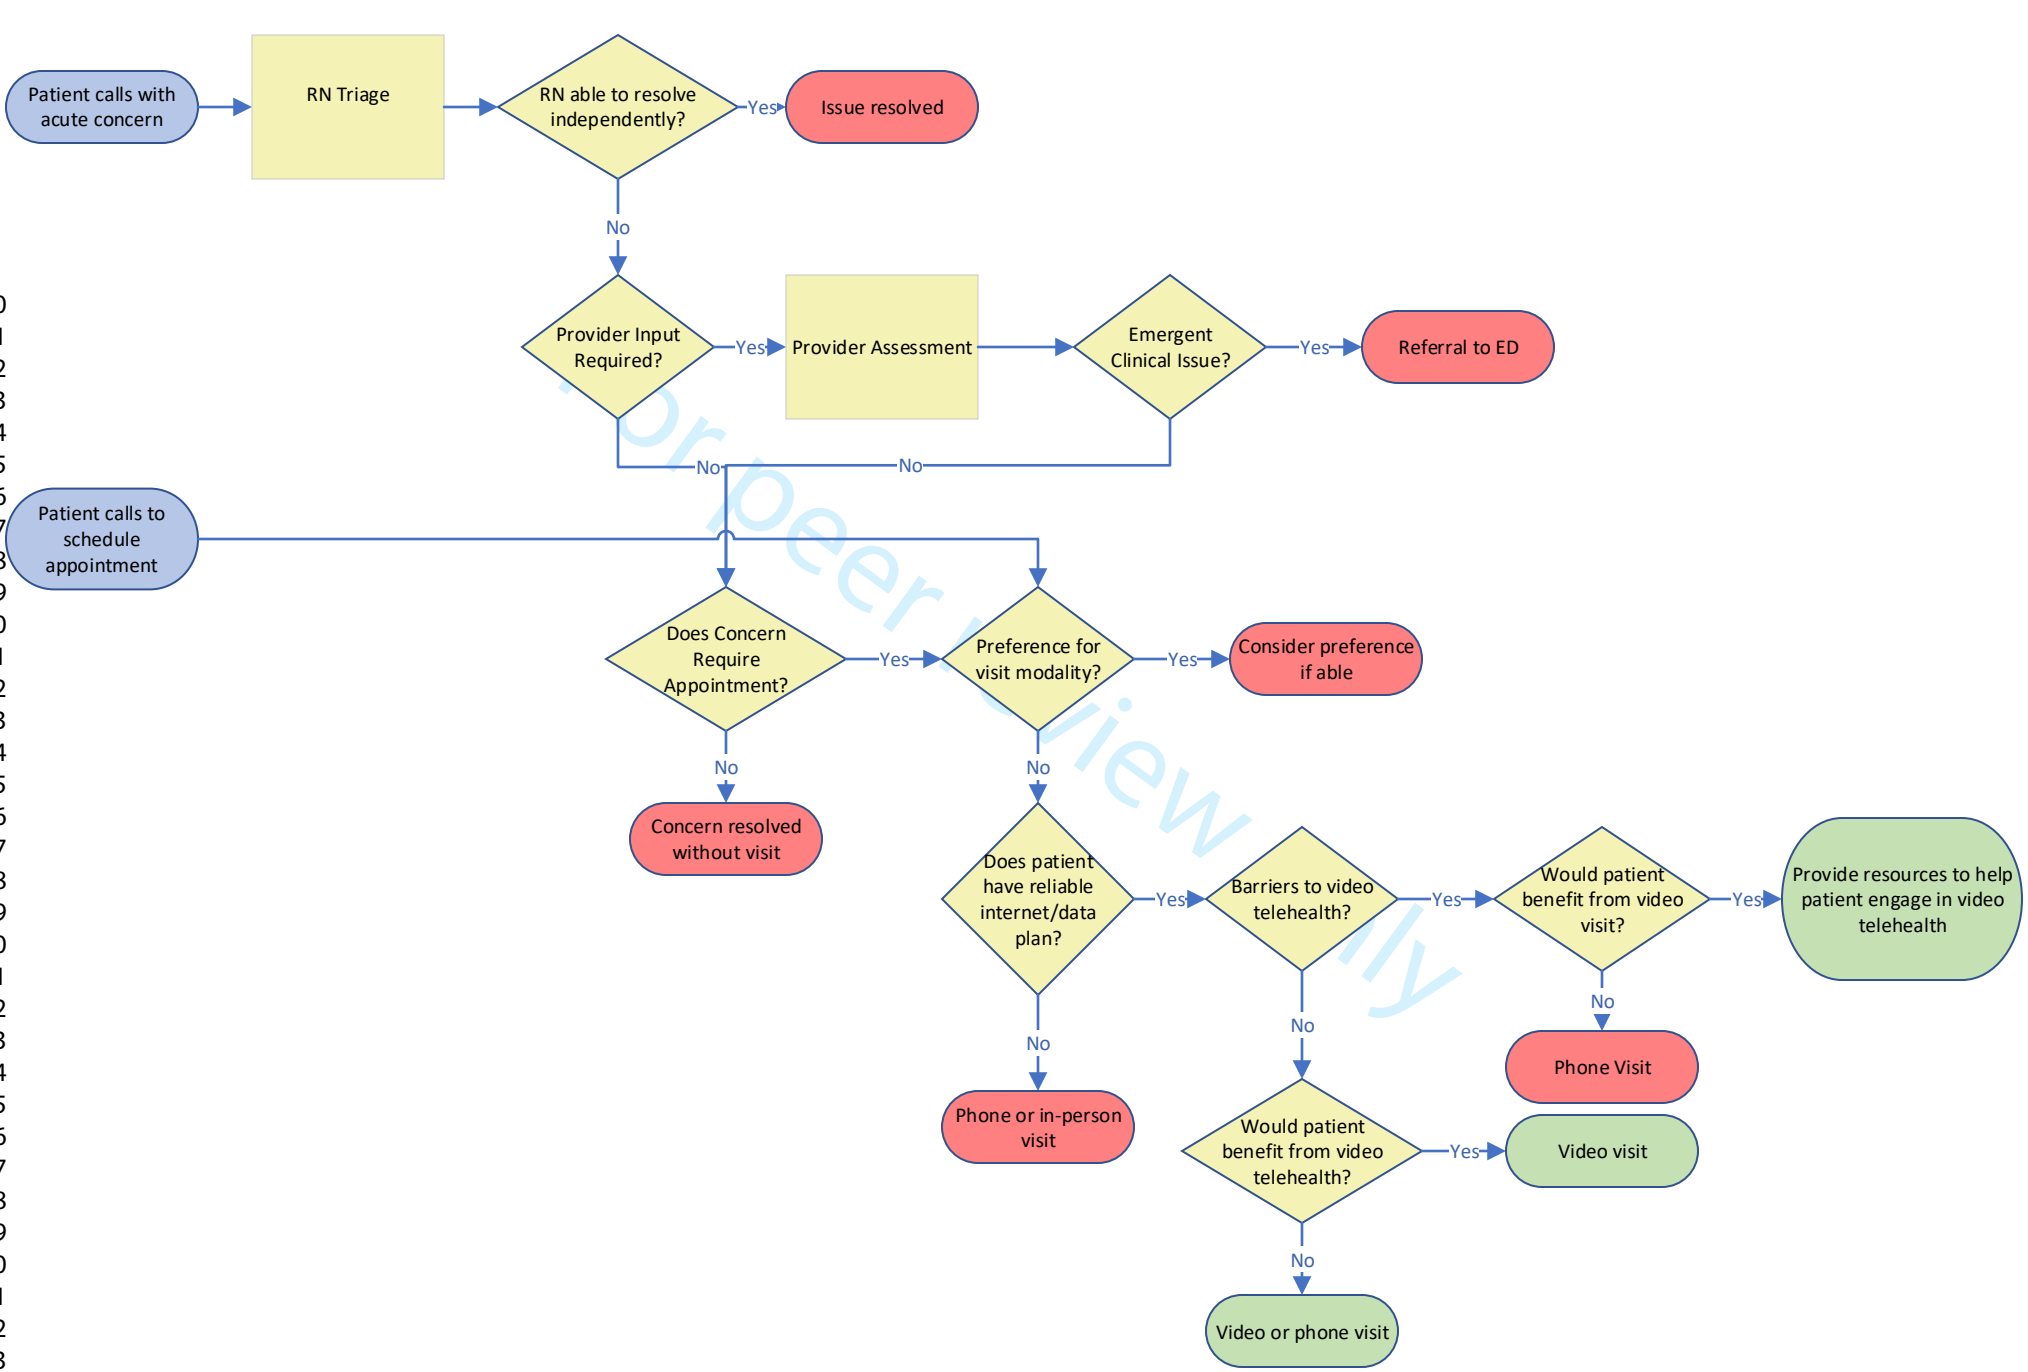

## Standards for Reporting Qualitative Research (SRQR)\*

<http://www.equator-network.org/reporting-guidelines/srqr/>

Page/line no(s).

### Title and abstract

|                                                                                                                                                                                                                                                              |     |
|--------------------------------------------------------------------------------------------------------------------------------------------------------------------------------------------------------------------------------------------------------------|-----|
| <p><b>Title</b> - Concise description of the nature and topic of the study Identifying the study as qualitative or indicating the approach (e.g., ethnography, grounded theory) or data collection methods (e.g., interview, focus group) is recommended</p> | 1   |
| <p><b>Abstract</b> - Summary of key elements of the study using the abstract format of the intended publication; typically includes background, purpose, methods, results, and conclusions</p>                                                               | 2-3 |

### Introduction

|                                                                                                                                                                     |     |
|---------------------------------------------------------------------------------------------------------------------------------------------------------------------|-----|
| <p><b>Problem formulation</b> - Description and significance of the problem/phenomenon studied; review of relevant theory and empirical work; problem statement</p> | 4-5 |
| <p><b>Purpose or research question</b> - Purpose of the study and specific objectives or questions</p>                                                              | 5   |

### Methods

|                                                                                                                                                                                                                                                                                                                                                                                                             |     |
|-------------------------------------------------------------------------------------------------------------------------------------------------------------------------------------------------------------------------------------------------------------------------------------------------------------------------------------------------------------------------------------------------------------|-----|
| <p><b>Qualitative approach and research paradigm</b> - Qualitative approach (e.g., ethnography, grounded theory, case study, phenomenology, narrative research) and guiding theory if appropriate; identifying the research paradigm (e.g., postpositivist, constructivist/ interpretivist) is also recommended; rationale**</p>                                                                            | 5-7 |
| <p><b>Researcher characteristics and reflexivity</b> - Researchers' characteristics that may influence the research, including personal attributes, qualifications/experience, relationship with participants, assumptions, and/or presuppositions; potential or actual interaction between researchers' characteristics and the research questions, approach, methods, results, and/or transferability</p> | 6   |
| <p><b>Context</b> - Setting/site and salient contextual factors; rationale**</p>                                                                                                                                                                                                                                                                                                                            | 6   |
| <p><b>Sampling strategy</b> - How and why research participants, documents, or events were selected; criteria for deciding when no further sampling was necessary (e.g., sampling saturation); rationale**</p>                                                                                                                                                                                              | 6-7 |
| <p><b>Ethical issues pertaining to human subjects</b> - Documentation of approval by an appropriate ethics review board and participant consent, or explanation for lack thereof; other confidentiality and data security issues</p>                                                                                                                                                                        | 5   |
| <p><b>Data collection methods</b> - Types of data collected; details of data collection procedures including (as appropriate) start and stop dates of data collection and analysis, iterative process, triangulation of sources/methods, and modification of procedures in response to evolving study findings; rationale**</p>                                                                             | 6-7 |



|                       |                                                                                                                                                                                                                                                       |     |
|-----------------------|-------------------------------------------------------------------------------------------------------------------------------------------------------------------------------------------------------------------------------------------------------|-----|
| 1<br>2<br>3<br>4<br>5 | <b>Data collection instruments and technologies</b> - Description of instruments (e.g., interview guides, questionnaires) and devices (e.g., audio recorders) used for data collection; if/how the instrument(s) changed over the course of the study | 6-7 |
| 6<br>7<br>8           | <b>Units of study</b> - Number and relevant characteristics of participants, documents, or events included in the study; level of participation (could be reported in results)                                                                        | 6-7 |
| 9<br>10<br>11<br>12   | <b>Data processing</b> - Methods for processing data prior to and during analysis, including transcription, data entry, data management and security, verification of data integrity, data coding, and anonymization/de-identification of excerpts    | 6-8 |
| 13<br>14<br>15<br>16  | <b>Data analysis</b> - Process by which inferences, themes, etc., were identified and developed, including the researchers involved in data analysis; usually references a specific paradigm or approach; rationale**                                 | 6-8 |
| 17<br>18<br>19<br>20  | <b>Techniques to enhance trustworthiness</b> - Techniques to enhance trustworthiness and credibility of data analysis (e.g., member checking, audit trail, triangulation); rationale**                                                                | 5-7 |

### Results/findings

|                      |                                                                                                                                                                                                   |             |
|----------------------|---------------------------------------------------------------------------------------------------------------------------------------------------------------------------------------------------|-------------|
| 23<br>24<br>25<br>26 | <b>Synthesis and interpretation</b> - Main findings (e.g., interpretations, inferences, and themes); might include development of a theory or model, or integration with prior research or theory | 8-11        |
| 27<br>28<br>29       | <b>Links to empirical data</b> - Evidence (e.g., quotes, field notes, text excerpts, photographs) to substantiate analytic findings                                                               | Table 1 & 2 |

### Discussion

|                                  |                                                                                                                                                                                                                                                                                                                                                                                                             |       |
|----------------------------------|-------------------------------------------------------------------------------------------------------------------------------------------------------------------------------------------------------------------------------------------------------------------------------------------------------------------------------------------------------------------------------------------------------------|-------|
| 32<br>33<br>34<br>35<br>36<br>37 | <b>Integration with prior work, implications, transferability, and contribution(s) to the field</b> - Short summary of main findings; explanation of how findings and conclusions connect to, support, elaborate on, or challenge conclusions of earlier scholarship; discussion of scope of application/generalizability; identification of unique contribution(s) to scholarship in a discipline or field | 12-15 |
| 38<br>39                         | <b>Limitations</b> - Trustworthiness and limitations of findings                                                                                                                                                                                                                                                                                                                                            | 14    |

### Other

|                |                                                                                                                                               |   |
|----------------|-----------------------------------------------------------------------------------------------------------------------------------------------|---|
| 42<br>43<br>44 | <b>Conflicts of interest</b> - Potential sources of influence or perceived influence on study conduct and conclusions; how these were managed | 3 |
| 45<br>46       | <b>Funding</b> - Sources of funding and other support; role of funders in data collection, interpretation, and reporting                      | 3 |

\*The authors created the SRQR by searching the literature to identify guidelines, reporting standards, and critical appraisal criteria for qualitative research; reviewing the reference lists of retrieved sources; and contacting experts to gain feedback. The SRQR aims to improve the transparency of all aspects of qualitative research by providing clear standards for reporting qualitative research.

1  
2  
3  
4  
5  
6  
7  
8  
9  
10  
11  
12  
13  
14  
15  
16  
17  
18  
19  
20  
21  
22  
23  
24  
25  
26  
27  
28  
29  
30  
31  
32  
33  
34  
35  
36  
37  
38  
39  
40  
41  
42  
43  
44  
45  
46  
47  
48  
49  
50  
51  
52  
53  
54  
55  
56  
57  
58  
59  
60

\*\*The rationale should briefly discuss the justification for choosing that theory, approach, method, or technique rather than other options available, the assumptions and limitations implicit in those choices, and how those choices influence study conclusions and transferability. As appropriate, the rationale for several items might be discussed together.

**Reference:**

O'Brien BC, Harris IB, Beckman TJ, Reed DA, Cook DA. **Standards for reporting qualitative research: a synthesis of recommendations.** *Academic Medicine*, Vol. 89, No. 9 / Sept 2014  
DOI: 10.1097/ACM.0000000000000388

For peer review only

# BMJ Open

## How can equitable video visit access be delivered in primary care? A qualitative study among rural primary care teams and patients

|                                 |                                                                                                                                                                                                                                                                                                                                                                                                                                                                                                                                                                    |
|---------------------------------|--------------------------------------------------------------------------------------------------------------------------------------------------------------------------------------------------------------------------------------------------------------------------------------------------------------------------------------------------------------------------------------------------------------------------------------------------------------------------------------------------------------------------------------------------------------------|
| Journal:                        | <i>BMJ Open</i>                                                                                                                                                                                                                                                                                                                                                                                                                                                                                                                                                    |
| Manuscript ID                   | bmjopen-2022-062261.R2                                                                                                                                                                                                                                                                                                                                                                                                                                                                                                                                             |
| Article Type:                   | Original research                                                                                                                                                                                                                                                                                                                                                                                                                                                                                                                                                  |
| Date Submitted by the Author:   | 15-Jul-2022                                                                                                                                                                                                                                                                                                                                                                                                                                                                                                                                                        |
| Complete List of Authors:       | Goldstein, Karen; Duke University, Perry, Kathleen R.; Vagelos College of Physicians & Surgeons<br>Lewinski, Allison ; Duke University<br>Walsh, Conor; Durham VA Health Care System; Duke University School of Medicine<br>Shepherd-Banigan, Megan E.; Durham Vet Affairs Med Ctr<br>Bosworth, HB; Duke University<br>Weidenbacher, Hollis; Durham VA Health Care System<br>Blalock, Dan ; Duke University,<br>Zullig, Leah; Durham Veterans Affairs Medical Center, Center for Health Services Research in Primary Care; Duke University, Department of Medicine |
| <b>Primary Subject Heading</b>: | General practice / Family practice                                                                                                                                                                                                                                                                                                                                                                                                                                                                                                                                 |
| Secondary Subject Heading:      | Communication, Patient-centred medicine                                                                                                                                                                                                                                                                                                                                                                                                                                                                                                                            |
| Keywords:                       | PRIMARY CARE, Telemedicine < BIOTECHNOLOGY & BIOINFORMATICS, GENERAL MEDICINE (see Internal Medicine)                                                                                                                                                                                                                                                                                                                                                                                                                                                              |
|                                 |                                                                                                                                                                                                                                                                                                                                                                                                                                                                                                                                                                    |

SCHOLARONE™  
Manuscripts



I, the Submitting Author has the right to grant and does grant on behalf of all authors of the Work (as defined in the below author licence), an exclusive licence and/or a non-exclusive licence for contributions from authors who are: i) UK Crown employees; ii) where BMJ has agreed a CC-BY licence shall apply, and/or iii) in accordance with the terms applicable for US Federal Government officers or employees acting as part of their official duties; on a worldwide, perpetual, irrevocable, royalty-free basis to BMJ Publishing Group Ltd ("BMJ") its licensees and where the relevant Journal is co-owned by BMJ to the co-owners of the Journal, to publish the Work in this journal and any other BMJ products and to exploit all rights, as set out in our [licence](#).

The Submitting Author accepts and understands that any supply made under these terms is made by BMJ to the Submitting Author unless you are acting as an employee on behalf of your employer or a postgraduate student of an affiliated institution which is paying any applicable article publishing charge ("APC") for Open Access articles. Where the Submitting Author wishes to make the Work available on an Open Access basis (and intends to pay the relevant APC), the terms of reuse of such Open Access shall be governed by a Creative Commons licence – details of these licences and which [Creative Commons](#) licence will apply to this Work are set out in our licence referred to above.

Other than as permitted in any relevant BMJ Author's Self Archiving Policies, I confirm this Work has not been accepted for publication elsewhere, is not being considered for publication elsewhere and does not duplicate material already published. I confirm all authors consent to publication of this Work and authorise the granting of this licence.

**Title:** How can equitable video visit access be delivered in primary care? A qualitative study among rural primary care teams and patients

**Running Title:** Clinical algorithm for video visit access

**Authors:** Karen M. Goldstein MD MSPH<sup>1,2</sup>, Kathleen R. Perry MS MDiv<sup>3</sup>, Allison Lewinski Ph.D.<sup>1,4</sup>, Conor Walsh MD <sup>1,2</sup>, Megan Shepherd-Banigan PhD<sup>1,5-6</sup>, Hayden B. Bosworth Ph.D. <sup>1,2,4-5, 7</sup>, Hollis Weidenbacher Ph.D.<sup>1</sup>, Dan V. Blalock Ph.D.<sup>1,7</sup>, Leah L. Zullig<sup>1,5</sup>

1. Center of Innovation to Accelerate Discovery and Practice Transformation, Durham VA Health Care System, Durham, NC 27705, USA
2. Division of General Internal Medicine, Duke University School of Medicine, Durham, NC
3. Columbia University, Vagelos College of Physicians & Surgeons, 630 W 168th St, New York, NY 10032
4. Duke University, School of Nursing, 307 Trent Drive, Durham, NC 27710
5. Duke University, Department of Population Health Sciences, 215 Morris Street, Durham, NC, 27701, USA
6. Duke-Margolis Center for Health Policy, 100 Fuqua Drive, Box 90120 Durham, NC 27708, USA
7. Duke University, Department of Psychiatry and Behavioral Sciences, 2213 Elba St, Durham, NC 27705, USA

**Corresponding Author:**

Karen M. Goldstein MD, MSPH  
508 Fulton Street  
Durham, NC 27705  
919.286.0411 ext 177764  
[Karen.goldstein@duke.edu](mailto:Karen.goldstein@duke.edu)

**Key Words:** virtual care, primary care, telemedicine, racial disparities, rural disparities

**Word Count:** 2993

**Abstract:**

**Objective:** The COVID-19 pandemic sparked exponential growth in video visit use in primary care. The rapid shift to virtual from in-person care exacerbated digital access disparities across racial groups and rural populations. Moving forward, it is critical to understand when and how to incorporate video visits equitably into primary care. We sought to develop a novel clinical algorithm to guide primary care clinics on how and when to employ video visits as part of care delivery.

**Design:** Qualitative data collection; 1 team member conducted all patient semi-structured interviews and led all focus groups with 4 other team members taking notes during groups

**Setting:** 3 rural primary care clinics in the United States

**Participants:** 24 Black veterans living in rural areas and 3 primary care teams caring for Black veterans living in rural areas

**Primary and secondary outcome measures:** Findings from semi-structured interviews with patients and focus groups with primary care teams.

**Results:** Key issues around appropriate use of video visits for clinical teams included having adequate technical support, encouraging engagement during video visits, and using video visits for appropriate clinical situations. Patients reported challenges with broadband access, inadequate equipment, concerns about the quality of video care, the importance of visit modality choice, and preferences for in-person care experience over virtual care. We developed an algorithm that requires input from both patients and their care team to assess fit for each clinical encounter.

1  
2  
3 **Conclusions:** Informed matching of patients and clinical situations to the right visit  
4  
5 modality, along with individual patient technology support could reduce virtual access  
6  
7 disparities.  
8  
9

10 **Trial registration:** NA  
11  
12

## 13 **Article Summary**

### 14 **Strengths and Limitations of the study:**

- 15 1. Primary qualitative data collection from patients and care providers in the same  
16 clinical catchment area.
- 17 2. Data collection centered on a historically under-resourced population to promote  
18 equitable clinical algorithm development.
- 19 3. Partnered engagement in data collection tool development.
- 20 4. Data collected from one geographic area and one health care system may not  
21 translate to other regions or clinical settings.
- 22 5. Focus groups were conducted virtually which may have limited the participation  
23 of some individuals.  
24  
25  
26  
27  
28  
29  
30  
31  
32  
33  
34  
35  
36  
37  
38  
39  
40  
41  
42  
43  
44  
45  
46  
47  
48  
49  
50  
51  
52  
53  
54  
55  
56  
57  
58  
59  
60

## Introduction

The optimal role of video visits within primary care is undefined. With the onset of COVID-19, the need to stem potential viral transmission led to dramatic and rapid shifts from in-person to virtually-delivered care, including video-based care. Video offers assessment and communication advantages not possible with phone alone (e.g., visualizing a rash), may support better patient-provider rapport building [1], and receives higher remuneration from private insurers [2]. However, video-based care comes with distinct challenges for clinical teams (e.g., new clinic workflow) and patients (e.g., device access, technical literacy). In the absence of clear evidence, there is an urgent need to identify the right telehealth modality for the right clinical problem for the right patient at the right time [3].

Finding the optimal role for virtual primary care is particularly critical for historically marginalized and under-resourced populations. While telephone-delivered care may increase access to care [4], early findings show that when compared to phone-based care, systemically disadvantaged populations (e.g. older adults, those in rural or low bandwidth areas, racial and ethnic minorities, unhoused individuals) are less likely to engage in video visits [5] [6]. Compared to phone, access disparities were more pronounced with video visits due to requirements for digital literacy, higher cost, camera-ready phones or computers, and access to adequate bandwidth [5] [7] [8] [9] [10]. These findings underscore the structural determinants of telehealth disparities, including structural racism and unequal access to the internet [11] [12]. Addressing inequitable engagement in virtual care and related access disparities requires action at multiple levels from individual clinic practices to national policies.



1  
2  
3 Our objective was to develop a clinical algorithm to guide when and how to incorporate  
4 video visits into primary care delivery. For this algorithm to support equitable video visit  
5 access, we focused our data collection on patients who have historically experienced  
6 systemic healthcare access limitations. As the largest provider of US primary care and a  
7 national telehealth leader, the Department of Veterans Affairs Health Care System (VA)  
8 is an optimal setting to examine how to optimize virtual care delivery. Thus, we engaged  
9 populations at increased risk for low video uptake, specifically rural, Black veterans [6]  
10 [8] [13]

## 21 **Materials and Methods**

22 Data collection occurred among patients and clinical team members of VA outpatient  
23 primary care clinics in the Piedmont area of North Carolina which serve large  
24 populations of rural dwelling individuals. All study activities were reviewed and approved  
25 by the Durham VA Health Care System Institutional Review Board (IRB #02312). We  
26 followed COREQ guidelines for reporting of qualitative research where applicable [14].

27 Framework: We anchored our approach on the conceptualization of access developed  
28 by Fortney and colleagues [15]. This model emphasizes actual and perceived access to  
29 virtual and in-person care and guided our data collection materials (e.g., interview  
30 guides, matrix analysis, structured note templates), eligibility criteria (e.g., users, non-  
31 users), and debriefing sessions among the research team.

32 Setting: We defined rurality using Rural-Urban Communicating Areas (RUCA)  
33 consistent with the VA Office of Rural Health [16]. At the time of data collection, all  
34 clinics were providing in-person, telephone-based, and video-based care, though virtual

1  
2  
3 care, including video-based care, was encouraged across the VA health care system  
4  
5 due to the pandemic [17]. While there was some flexibility on use of approved  
6  
7 commercially available video-conference platforms during the early pandemic, the VA  
8  
9 primarily uses an internal VA platform for video-based care delivery.  
10  
11

12  
13 Patients: We conducted 26 semi-structured interviews with veterans who were identified  
14  
15 as Black in the electronic health record, who were engaged in VA health care (i.e.,  $\geq 1$   
16  
17 primary care visits within the prior 12 months) and lived in rural areas. Recruitment was  
18  
19 stratified by patients who had completed at least one video-based primary care  
20  
21 encounter (n=14) and those who had not (n=12). The research team contacted a subset  
22  
23 of potential participants via mailed letter in batches of 25 with purposive sampling of  
24  
25 Black veterans living in rural areas and then followed up by phone until the target  
26  
27 recruitment number was obtained and thematic saturation was reached. We obtained  
28  
29 verbal consent.  
30  
31  
32

33  
34 All interviews were conducted and recorded via WebEx (audio-only) between February-  
35  
36 May 2021 by a study team member (KP) who identifies as white and has training in  
37  
38 qualitative methodology. The interviewer listened to audio recordings and took  
39  
40 templated notes. To ensure reliability and validity, a second study team member (AL,  
41  
42 KG, LZ, MSB, CW) independently listened to interviews, reviewed, and amended  
43  
44 interviewer notes. Responses to each domain were summarized using matrix analysis  
45  
46 for participants stratified by previous video visit experience. Summary responses were  
47  
48 generated independently by two team members and reviewed by a third reviewer.  
49  
50  
51

52  
53 Patient and Public Involvement: The driving question for this project was developed in  
54  
55 response to trends in patient utilization of video-based care and the need to obtain  
56  
57  
58

1  
2  
3 patient preferences and experiences directly from the patients themselves. We received  
4  
5 consultation on our approach from the Durham VA Veteran Engagement Panel and the  
6  
7 Durham VA Health Care System Antiracism and Black Equity Advisory Board; however,  
8  
9 these individuals were not directly involved in the conduct of this work.  
10  
11

12  
13 Primary Care Teams: We invited all primary care team members from three VA primary  
14  
15 care clinics serving a single facility in the Piedmont area of North Carolina which cares  
16  
17 for a large population of Black, rural-dwelling population to participate in clinic specific  
18  
19 focus groups. We conducted four video-based focus groups across these three clinics  
20  
21 between December 2020 and February 2021 using WebEx video-conferencing platform.  
22  
23 Participants were encouraged to turn on their cameras if available and to make use of  
24  
25 the chat function. Focus groups were first given the opportunity to review and provide  
26  
27 feedback on a process map [18], an explicit step-by-step illustrative flow diagram of a  
28  
29 proposed approach to the incorporation of video-visits into primary care based on  
30  
31 existing workflow in our institution (see Appendix 1). Discussions followed the focus  
32  
33 group guide. Research team members (n=3) took notes during focus groups using  
34  
35 structured templates. A rapid qualitative approach and matrix method were used to  
36  
37 identify focus group themes [19] [20] [21]. Notes from the structured templates were  
38  
39 consolidated into matrices consistent with Fortney model domains. This matrix analysis  
40  
41 approach was paired with real-time iterative team-based analysis [22]. A subgroup of  
42  
43 team members (KP, KG, CW, AL, MSB, LZ) met virtually during data collection to  
44  
45 review domain level findings and identify implications for primary care video-based care  
46  
47 delivery.  
48  
49  
50  
51  
52  
53  
54  
55  
56  
57  
58  
59  
60

1  
2  
3 Virtual care algorithm generation: We based the initial algorithm structure on our  
4  
5 proposed process map of virtual care incorporation into primary care workflow  
6  
7 (Appendix 1) and standards for clinical algorithm development [23]. Working from  
8  
9 themes identified through patient interviews and clinical team focus group findings, we  
10  
11 evaluated potential overlap, conflict, and novelty related to needs and preferences for  
12  
13 when video-based visits are acceptable. After prioritizing patient safety and clinical  
14  
15 appropriateness, we reorganized the preliminary clinical algorithm to explicitly include  
16  
17 patient choice and preferences and to ensure their formal incorporation into clinic  
18  
19 workflow (Figure 1). For example, from clinical focus groups, we added an initial step to  
20  
21 identify patients whose clinical characteristics would be more appropriate for a face-to-  
22  
23 face visit regardless of patient preference (e.g., patients with cognitive impairment).  
24  
25 Another example is adding assessment of patient preference for visit modality and need  
26  
27 for technical assistance as an explicit step before scheduling. This was based on patient  
28  
29 interview findings that there was great dissatisfaction when modality was assigned  
30  
31 rather than offered, and that the need for technical assistance was often a significant  
32  
33 barrier for patients. Our research team iteratively revised the algorithm and offered  
34  
35 clinical team focus group participants the opportunity to review it. Ultimately, our novel  
36  
37 algorithm seeks to guide whether video or an in-person care should be offered to a  
38  
39 specific patient with a given clinical situation, while incorporating consideration of the  
40  
41 patient's existing technical skills and equipment.  
42  
43  
44  
45  
46  
47  
48

## 50 **Results**

51  
52 Focus group participants included physicians, advanced-practice providers,  
53  
54 administrative staff members, and nurses (n=38). Twenty-four individuals completed  
55  
56  
57  
58  
59  
60

semi-structured interviews, 14 with and 12 without prior video visit experience.

Demographics of the interviewed patients are consistent with the source patient population (Table 1).

**Table 1. Characteristics of Patients Participating in Semi-structured Interviews**

|                               | Prior Video Visit<br>N = 14 | No Prior Video Visit<br>N = 12 |
|-------------------------------|-----------------------------|--------------------------------|
| Age, mean (SD)                | 64.50 (SD 9.00)             | 69.08 (8.69)                   |
| Gender*                       |                             |                                |
| Male                          | 11                          | 12                             |
| Female                        | 3                           | -                              |
| Tech self-efficacy †          | Mean=4                      | Mean=4.29                      |
| <3                            | 2                           | 2                              |
| 3-5                           | 12                          | 9                              |
| VA primary healthcare source  |                             |                                |
| Yes                           | 11                          | 11                             |
| No                            | -                           | 1                              |
| Not sure                      | 3                           | 1                              |
| Distance to closest VA        |                             |                                |
| 0-20 miles                    | 4                           | 5                              |
| 21-80 miles                   | 9                           | 6                              |
| missing                       | 1                           | 1                              |
| No. prior video visits        |                             |                                |
| 0 visits                      | -                           | 12                             |
| 1 visit                       | 2                           | -                              |
| 2-10 visits                   | 7                           | -                              |
| >10 visits                    | 5                           | -                              |
| No. prior telephone visits    |                             |                                |
| 0 visits                      | 2                           | 2                              |
| 1 visit                       | -                           | -                              |
| 2-10 visits                   | 7                           | 10                             |
| >10 visits                    | 5                           | -                              |
| Received help for video visit |                             |                                |
| Yes                           | 11                          | 1                              |
| No                            | 2                           | 10                             |
| Not sure                      | 1                           | 1                              |
| Device used for video visit   |                             |                                |
| iPhone                        | 5                           | -                              |
| Android phone                 | 5                           | -                              |
| Tablet                        | 2                           | -                              |
| Laptop or computer            | 2                           | -                              |
| Don't have any devices to use | 0                           | -                              |
| Reliable broadband            |                             |                                |

|                                                                                                                          |                      |                      |
|--------------------------------------------------------------------------------------------------------------------------|----------------------|----------------------|
| Yes                                                                                                                      | 11                   | 6                    |
| No                                                                                                                       | 1                    | 5                    |
| Not sure                                                                                                                 | 2                    | 1                    |
| Reliable device                                                                                                          |                      |                      |
| Yes                                                                                                                      | 12                   | 9                    |
| No                                                                                                                       | 2                    | 2                    |
| Not sure                                                                                                                 | 0                    | 1                    |
| Racism in health care (M across items, SD, # of respondents) ‡                                                           | 2.80 (1.17) for n=11 | 3.02 (0.72) for n=10 |
| Endorsed Agreement with:                                                                                                 |                      |                      |
| RHC 1: Doctors treat African American and White people the same. (N, %, # respondents)                                   | 2 (18.2%) of 11      | 7 (58.3%) of 12      |
| RHC 2: Racial discrimination in telehealth is common. (N, %, # respondents)                                              | 6 (50.0%) of 12      | 5 (50.0%) of 10      |
| RHC 3: In most hospitals, African American and Whites receive the same kind of telehealth care. (N, %, # respondents)    | 5 (41.6%) of 12      | 4 (36.4%) of 11      |
| RHC 4: African Americans can receive the telehealth care they want as equally as White people can. (N, %, # respondents) | 5 (38.5%) of 13      | 4 (36.4%) of 11      |
| Personal discrimination scale (M across items, SD) §                                                                     | 2.01 (0.75)          | 1.98 (0.77)          |
| Endorsed Experiencing:                                                                                                   |                      |                      |
| PDS 1: Treated with less courtesy than other people? (N, %, # respondents)                                               | 10 (71.4%) of 14     | 6 (60.0%) of 10      |
| PDS 2: Treated with less respect than other people? (N, %, # respondents)                                                | 11 (78.6%) of 14     | 7 (70.0%) of 10      |
| PDS 3: Received poorer services than other people? (N, %, # respondents)                                                 | 9 (69.2%) of 13      | 7 (70.0%) of 10      |
| PDS 4: Had a doctor or nurse act as if he or she thinks you were not smart? (N, %, # respondents)                        | 6 (42.9%) of 14      | 3 (30.0%) of 10      |
| PDS 5: Had a doctor or nurse act as if he or she was afraid of you? (N, %, # respondents)                                | 4 (28.6%) of 14      | 5 (50.0%) of 10      |
| PDS 6: Had a doctor or nurse act as if he or she was better than you? (N, %, # respondents)                              | 9 (64.3%) of 14      | 5 (55.6%) of 9       |
| PDS 7: Felt like a doctor or nurse was not listening to what you were saying? (N, %, # respondents)                      | 11 (78.6%) of 14     | 7 (70.0%) of 10      |
| Telehealth satisfaction scale (M across items, SD, # of respondents)                                                     | 1.83 (0.49) for n=13 | 2.02 (0.19) for n=9  |

\*as identified in chart

† Measure by response to the following question: How confident are you that you can complete the steps necessary that you identified above to attend a video visit with your provider on a scale of 1-5? One participant in the No prior Video Visit group did not provide an answer for this question.

‡ Racism in Healthcare measure (Hausmann et al[24]) agreement defined as marking “agree” or “strongly agree.” Average score computed with item 2 reverse coded; range of possible score by question 1-5 with 1 = strongly disagree and 5 = strongly agree

§ Personal discrimination scale adapted from Everyday discrimination scale[25]; endorsement marked by any response other than “Never” for all questions; range of possible score by question 1-5 with 1 = never and 5 = always

Telehealth Satisfaction Scale (TeSS [17])[26] is a 10-item measure with with range of possible score by question from 1 to 3 with 1 = “excellent” and 3 = “Poor/fair”.

Scale scores for RHC, PDS, and TeSS only computed when all items were answered.

Patient interviews lasted from 25-45 minutes and focus groups from 45-60 minutes.

Below, we present themes from patients and clinical team data collection (Table 2).

## Patient Findings

Perceived access to care: Most patients did not report personally experiencing or witnessing others receiving differential access to care due to personal identity.

However, several patients noted differential treatment around receipt of benefits, pain medication, and appointment scheduling: “...*All my life, from the service part all the way up to where [I am] today, I feel like I’ve had to fight for myself...*” (video-user). Reasons for differential treatment were attributed to characteristics such as age, racial identity, disability status, and/or a history of substance use disorder.

Patients commonly reported challenges to video-based visits due to having inadequate technical skills or a lack of access to needed equipment/broadband. Only half of patients who had successfully completed video-based visits previously felt confident in their ability to access video-based care in the future. For patients who did feel confident, having a successful first video visit experience was reassuring. Among those without a prior video visit, there were varying degrees of confidence: “*I’ve never used a computer, so I’m a little shaky of it, you understand?... because if I get the thing and I don’t know how to use it, that’s not worth a nickel... You hit one wrong button and you’re out of business*” (video non-user).

1  
2  
3 Satisfaction with care: Patients expressed multiple concerns about receiving care by  
4 video. First, patients commonly reported perceptions that video visits were of lower  
5 quality and more impersonal compared to in-person: *“Face to face makes it feel that I*  
6 *matter, that I’m important to the provider”* (video-user). Second, patients with and  
7 without prior video visits noted concerns about a provider’s ability to adequately assess  
8 medical concerns via video: *“They can’t make medical decisions without seeing you in*  
9 *the face, looking at your body”* (video-user). Third, many patients reported completing  
10 telephone-based visits and generally perceived phone-based visits to be lower quality  
11 than either in-person or video: *“it is hard to know on [the] phone [what the provider] is*  
12 *doing, whether they’re listening to you or understanding what you are saying. I’d prefer*  
13 *in-person visits, but video would be the next best thing”* (video non-user). Finally,  
14 patients wanted to choose whether to have their primary care encounter in-person or via  
15 video. Many patients reported being told that their visit would occur via video rather than  
16 being offered a choice. Some patients who had not completed video-based visits  
17 thought that they might feel more relaxed and less rushed at home: *“Very convenient if*  
18 *I’m going to stay on top of my health”* (video non-user).  
19  
20  
21  
22  
23  
24  
25  
26  
27  
28  
29  
30  
31  
32  
33  
34  
35  
36  
37  
38  
39  
40

41 Preferences for care: While patients acknowledged the potential convenience of video-  
42 based care, most individuals still preferred in-person: *“given the conditions we face*  
43 *today [COVID-19 pandemic], I understand it. But my preference is in the office”* (video  
44 non-user). Reasons given for this preference centered on the full experience of in-  
45 person care: *“If it was up to me, I’d go to the VA. It is a form of release for me...It’s a*  
46 *way for me to get out of the house”* (video-user). In-person care also was noted to offer  
47 better eye contact, rapport building, communication, physical exam, and the opportunity  
48  
49  
50  
51  
52  
53  
54  
55  
56  
57  
58  
59  
60



1  
2  
3 to coordinate care. The majority of patients thought visit modality should be tied to  
4 clinical need. Most veterans preferred video for mental health, while in-person was  
5 preferred for specific conditions, such as pain or urgent concerns. This preference  
6 appears to be related to a sense that either the provider could not fully evaluate the  
7 patient remotely or that the patient could not fully communicate their concerns when not  
8 face-to-face: *“They can see what’s going on and know if you’re having any difficulties.*  
9 *On video, you have to stay in one position, they don’t know how you feel, you’re just*  
10 *talking...in person, they can tell if you’re not genuine”* (video-user).  
11  
12  
13  
14  
15  
16  
17  
18  
19  
20  
21

### 22 **Clinical team member findings**

23  
24  
25 Perceived access to care: Clinical teams noted that digital connectivity issues frequently  
26 present problems for accessing care. Specifically, video platform malfunctions consume  
27 significant visit time. Additionally, many providers were unsatisfied with available  
28 technology for video visits. Team members noted a diminished interpersonal connection  
29 during video-based visits and that sometimes both parties (patients and clinicians) were  
30 distracted or not fully engaged. Difficulty engaging with certain patients via video was  
31 particularly problematic – specifically those with cognitive, significant sensory, or  
32 functional impairments. One strategy used to overcome technical barriers was having a  
33 family member or friend provide logistical support during a video visit. Overall, clinical  
34 teams reported that patients living in rural areas and older patients had the most  
35 difficulty engaging in video-based care due to limited availability of and comfort with  
36 technology.  
37  
38  
39  
40  
41  
42  
43  
44  
45  
46  
47  
48  
49  
50  
51

52  
53 Satisfaction with care: Clinicians felt that video visits were inadequate for certain  
54 situations and often scheduled without regard to clinical appropriateness of the  
55  
56  
57  
58  
59  
60

1  
2  
3 modality. Management of chronic condition (e.g., hypertension) was given as a specific  
4 example that could be appropriate for video, as were dermatologic conditions, mental  
5 health, and non-traumatic single joint pain. Clinical conditions not appropriate for video  
6 would include new patient visits, patients with cognitive impairment, or new conditions.  
7  
8  
9

10  
11  
12 Preferences for care: Clinicians expressed frustration when video-based care did not  
13 align with the patient's clinical problem. In addition, teams noted a significant need for  
14 streamlining the clinic workflow process which was felt to be designed for in-person  
15 visits and not conducive to virtual care. For example, due to in-person clinic demands,  
16 teams noted that often no one contacts patients in advance to verify that they have a  
17 working link for the video visit and that they are 'checked-in' online before an  
18 appointment.  
19  
20  
21  
22  
23  
24  
25  
26  
27  
28  
29

### 30 **Clinical algorithm**

31  
32 We identified three key decision points for matching a specific patient to a particular  
33 modality for an encounter. First, it is important to determine if the patient and their  
34 health concerns are clinically appropriate for video; second, patients need to agree to  
35 video modality use; third, patients need to be assessed for readiness for video visits  
36 (e.g., having accessible technology, adequate technical skills). These decision points  
37 seem to be implied in the existing primary care processes, but were not explicit or  
38 consistently applied. We combined these decision points into one ready-to-implement  
39 algorithm to clearly link the importance of both clinical appropriateness and patient  
40 readiness. Initially, the algorithm prompts clinical consideration of the appropriateness  
41 of a patient's current clinical concern for visit modality type (see Figure 2). Once a  
42 patient situation is deemed clinically appropriate for video-based care, the algorithm  
43  
44  
45  
46  
47  
48  
49  
50  
51  
52  
53  
54  
55  
56  
57  
58  
59  
60

1  
2  
3 then requires a patient's response regarding interest in video-based care. Note that the  
4  
5 algorithm does not specify who is responsible for making this determination. This is  
6  
7 because we anticipate that it could be managed by different clinical roles (e.g.,  
8  
9 physician, advanced practice provider, nurse care manager) depending on a given  
10  
11 clinic's resources and capacity. If the patient is interested in a video visit, the algorithm  
12  
13 proceeds to incorporate what equipment and technological support are needed in  
14  
15 advance of the video appointment. Importantly, it is possible that the provider would  
16  
17 determine that an in-person visit is still necessary after a video-based visit, though the  
18  
19 expectation and goal would be for this to be rare. Also identified through the integration  
20  
21 of patient and clinical team findings were key patient video visit preparation steps (Table  
22  
23  
24  
25  
26 3).

**Table 2. Clinician and patient experiences with primary care video visits**

| Domain                               | Patient                                                                                                                                                                                                                                                                                                                                                                                            | Clinical Team                                                                                                                                                                                                                                                                                                                                                                                                                                                                         | Implications for clinical algorithm                                                                                                                                                                                                                                                                                                                                                                                                                                                                                      |
|--------------------------------------|----------------------------------------------------------------------------------------------------------------------------------------------------------------------------------------------------------------------------------------------------------------------------------------------------------------------------------------------------------------------------------------------------|---------------------------------------------------------------------------------------------------------------------------------------------------------------------------------------------------------------------------------------------------------------------------------------------------------------------------------------------------------------------------------------------------------------------------------------------------------------------------------------|--------------------------------------------------------------------------------------------------------------------------------------------------------------------------------------------------------------------------------------------------------------------------------------------------------------------------------------------------------------------------------------------------------------------------------------------------------------------------------------------------------------------------|
| Perceived access to video-based care | <ul style="list-style-type: none"> <li>• Some experiences of differential treatment by personal identity in health care setting</li> <li>• Barriers: Technical skills and equipment, lack of confidence</li> <li>• Scheduling generally easy</li> </ul>                                                                                                                                            | <ul style="list-style-type: none"> <li>• Video platform malfunctions take up valuable clinical time</li> <li>• Diminished interpersonal connection with patients</li> <li>• Not appropriate for patients with specific limitations (e.g. cognitive impairment, significant sensory impairment)</li> <li>• Rural dwelling and older adults had most difficulty accessing video visits</li> <li>• First video visit was the hardest</li> <li>• Family friends can be helpful</li> </ul> | <ul style="list-style-type: none"> <li>• Clinical team training to optimize interpersonal rapport via video</li> <li>• Clinical triage for video visit appropriateness</li> <li>• Offer all patients opportunity to practice video visits prior to scheduled appointment, especially before first visit</li> <li>• Encourage patient to recruit family/friends for assistance</li> <li>• Assess patient preparedness for video visit (including broadband access, equipment, technical literacy)</li> </ul>              |
| Satisfaction with video-based care   | <p>Negative aspects of video visits:</p> <ul style="list-style-type: none"> <li>• Impersonal</li> <li>• Inadequate for quality medical care</li> <li>• Providers distracted</li> <li>• Technical barriers</li> </ul> <p>Positive aspects of video visits:</p> <ul style="list-style-type: none"> <li>• More relaxed</li> <li>• Less rushed</li> <li>• Desired choice for visit modality</li> </ul> | <ul style="list-style-type: none"> <li>• Video inadequate for some clinical presentations</li> <li>• Video not appropriate for new patient visits</li> </ul>                                                                                                                                                                                                                                                                                                                          | <ul style="list-style-type: none"> <li>• Transparency with patients about when video is appropriate and why it is being offered</li> <li>• Use same approach regarding modality choice for all patients</li> <li>• Enlist technical support for troubleshooting</li> <li>• Establish a back-up plan for connection in advance of appointment (e.g. alternate video platforming, telephone)</li> <li>• Prepare patients for optimal engagement</li> <li>• Give patients choice of participating in video visit</li> </ul> |
| Attitudes towards video-based care   | <ul style="list-style-type: none"> <li>• Many preferred in-person despite convenience of video</li> <li>• In-person care perceived as better than video</li> </ul>                                                                                                                                                                                                                                 | <ul style="list-style-type: none"> <li>• Frustrated when modality choice made without consideration for clinical appropriateness</li> </ul>                                                                                                                                                                                                                                                                                                                                           | <ul style="list-style-type: none"> <li>• Allow in-person as per patient preference</li> <li>• Adapt clinic team workflow to support multi-modality clinical care</li> </ul>                                                                                                                                                                                                                                                                                                                                              |

- Appeal of ritual of in-person care
- Video not always best for patient needs

- Need for clinic workflows to adapt to virtual care requirements
- Management of video-based visit needs should not fall solely on providers

- Interdisciplinary collaboration around video visit workflow

For peer review only

**Table 3. Patient teaching points before a video visit**

| Patient Teaching Before Video Visit                       |                                                   |                                                                                                                       |
|-----------------------------------------------------------|---------------------------------------------------|-----------------------------------------------------------------------------------------------------------------------|
| At Scheduling                                             | In Advance of Visit                               | During a Visit                                                                                                        |
| Explain when video visit is appropriate                   | Prepare for visit as you would an in-person visit | Limit distractions                                                                                                    |
| Explain that clinical team will determine appropriateness | Join video platform at least 15 minutes early     | Do not multi-task during visit (e.g., do not clean house)                                                             |
| Give patients a choice                                    | Ensure visual and auditory privacy                | Do not drive during video visit                                                                                       |
|                                                           | Recruit a family member to help                   | Be aware that your provider may at times not be making eye contact while looking at medical record on a second screen |
|                                                           | Create a back-up plan                             |                                                                                                                       |

## Discussion

We identified patient and primary care team experiences with video visits across key dimensions of telehealth access and used our findings to develop a novel algorithm to guide the incorporation of equitable video visits into primary care. Consistent with previous literature, we confirmed that clinicians have concerns about technology malfunction, inadequate technical support, and recognize the importance of having a family or friend available before and during a visit to assist with the patient's technology [27] [28] [29]. Our study provides new insight in virtual care use. We found that patients are concerned with quality of video-based care, prefer to have choice of visit modality, and place personal value on in-person experience despite convenience costs.

1  
2  
3 Our intention was to develop an algorithm that could support equitable access to virtual  
4 care; however, we did not identify a consistent pattern about which patients would  
5 prefer video-based care. Thus, we incorporated features intended to promote equity in  
6 access to video-based care broadly: 1) emphasized the importance of using this  
7 algorithm with all patients to avoid implicit bias regarding who may or may not want a  
8 video visit and and/or need technological support; 2) underscored patient choice  
9 regarding visit modality when possible; 3) identified actions to promote optimal patient  
10 engagement during a video visit; and 4) recognized clinician behaviors that promote  
11 trustworthiness and transparency during video-based encounters. One concern raised  
12 by some veteran participants was that if a video-based visit was completed and that  
13 either the patient or their provider wanted an in-person follow-up visit, that the  
14 opportunity for that in-person visit might be lost. In fact, one type of visit does not  
15 preclude the other. While clinical encounters that are conducted virtually may later  
16 require an in-person evaluation (e.g., due to patient preference or change in clinical  
17 indication), it is unknown how frequently this is likely to occur. Also unknown is the  
18 optimal timing and frequency of an in-person follow-up visit after video-based care. As  
19 this has important implications for the patient experience, patient outcomes, and health  
20 system resource use, exploration of impact of virtual care on overall healthcare  
21 utilization will be important for future research. In addition, we acknowledge that there  
22 are other existing approaches for choosing visit modality[30]. However, existing guides  
23 generally have not systematically incorporated the patient perspective in visit modality  
24 choice[31] [32]. Our algorithm purposively centers on the patient, as well as on the  
25 patient-provider dyad, through careful consideration of a patient's preferences and their  
26  
27  
28  
29  
30  
31  
32  
33  
34  
35  
36  
37  
38  
39  
40  
41  
42  
43  
44  
45  
46  
47  
48  
49  
50  
51  
52  
53  
54  
55  
56  
57  
58  
59  
60

1  
2  
3 experiences with telehealth, particularly tailored to patients from historically under-  
4 resourced populations. This is a population which has traditionally suffered from  
5 inequities in access to traditional in-person care and is at risk for similar challenges in  
6 accessing video-based care. Our algorithm proactively addresses this risk at a time  
7 when video-based care is on a precipitous rise.  
8  
9

10  
11 We also identified that both patients and clinicians expressed concerns about the  
12 impact of video visits on patient-provider relationship and subsequent clinical care  
13 quality. In particular, patients expressed misgivings about quality of care received via  
14 video. While the importance of patient confidence in virtual care has been previously  
15 noted [33] [34], our study adds that this may not be true for all types of care or at all  
16 points in the care continuum. Similar to patients, clinicians commonly described  
17 concerns about the interpersonal quality of virtual clinical interactions, especially around  
18 building rapport with new patients [35] and loss of body language and social cues [36]  
19 [37]. Strategies to improve the virtual care experience including improving accessibility  
20 through access to closed captioning and language interpretation [38], incorporation of  
21 trauma-informed care principles such as transparency during visit actions and  
22 maintaining good eye contact [38] [39], and adequate technology training for patients  
23 and clinical teams [27] [40]. Together with previous findings, our work points to the need  
24 for an intentional approach to the implementation of high-quality, equitable, patient-  
25 centered video-based care.  
26  
27  
28  
29  
30  
31  
32  
33  
34  
35  
36  
37  
38  
39  
40  
41  
42  
43  
44  
45  
46  
47  
48  
49

50 This research has limitations. First, our clinical support algorithm was informed by  
51 qualitative data from clinical teams in rural North Carolina and Black veterans residing in  
52 rural areas. However, it may be applicable to other rural, minoritized patients using  
53  
54  
55  
56  
57  
58  
59  
60



1  
2  
3 virtual care in other health care systems with similar reimbursement pressures. Second,  
4 we focused on the context of primary care and, thus, the algorithm may not be relevant  
5 to specialty care. For example, specialty clinics typically provide care for individual  
6 conditions or organ systems for which it may be easier to predict clinical  
7 appropriateness of video-based care. Third, we focused this algorithm on the choice  
8 between video-based visits vs care delivered in-person because health care system and  
9 insurance reimbursement policies have generally favored video-based care and not  
10 phone-based care. We acknowledge that telephone-based care has been recognized  
11 as an important modality for maintaining access to care, especially for patients with  
12 limited access to broadband services. However, as our work focused on video versus  
13 face-to-face care based on what services were anticipated to remain reimbursable post-  
14 pandemic, we did not collect data about how and when phone should fit into visit  
15 modality decisions. Within the VA health care system, there is no differential  
16 reimbursement for telephone-based care, video-based care, and in-person care. This  
17 may limit generalizability of our algorithm into other health care systems that may have  
18 a financial driver that could usurp patient and/or provider preference. Fourth, the  
19 interviewer for both the focus groups and the patient interviews identifies as white,  
20 which may have influenced participant willingness to disclose racial discrimination  
21 experiences. Our center has made a focused effort to hire and train diverse qualitative  
22 staff since the conclusion of this work. Finally, determinants of access to health care  
23 expand beyond clinic level policies and actions thus broader innovation and changes  
24 will be required to address access disparities.

## 54 **Conclusions**

1  
2  
3 Optimal and equitable incorporation of video visits into primary care delivery requires  
4 thoughtful planning and potential re-working of clinic workflow. Assessment of clinical  
5 appropriateness of a virtual modality as well as patient preference and technological  
6 readiness are crucial before each visit. Next steps for this work include evaluating the  
7 feasibility of our algorithm in a primary care practice and validating measures to assess  
8 patient interest in video visits. It will be critical to identify determinants of video visit  
9 uptake and areas needing adaptation for site specific characteristics. Informed matching  
10 of patients and clinical situations to the right visit modality, along with individual patient  
11 technology support, could contribute to broader virtual access disparities.  
12  
13  
14  
15  
16  
17  
18  
19  
20  
21  
22  
23

## 24 **Figure Legend**

25  
26  
27 **Figure 1. Algorithm Development Process**

28  
29  
30 **Figure 2. Clinical Support Algorithm for Incorporation of Video Visits into Primary**  
31 **Care Workflow**

32  
33  
34  
35 **Appendix. Process Map of Pre-existing Primary Care Workflow for Incorporation**  
36 **of Video-Based Care**  
37  
38  
39  
40  
41  
42  
43

44 **Prior Presentations:** Partial findings from this project were presented at the 2021  
45 Dissemination and Implementation Virtual Conference.  
46  
47  
48

49 **Contributorship Statement:** KMG co-conceptualized this project, participated in data  
50 collection, analysis and interpretation, and drafted this work; KRP developed data  
51 collection and analysis plan, collected the data, contributed to analysis, and edited the  
52  
53  
54  
55  
56  
57  
58  
59  
60

1  
2  
3 manuscript; AL, CW, and MSB participated in data collection, analysis and  
4  
5 interpretation, and edited the manuscript; HBB contributed to conceptualization,  
6  
7 interpretation, and edited this manuscript. HW supported data collection and analysis  
8  
9 and edited this manuscript; DVB contributed to data analysis, interpretation and edited  
10  
11 this manuscript. LLZ co-conceptualized this project, participated in data collection,  
12  
13 analysis and interpretation, and drafted this work.  
14  
15

16  
17 **Competing interests:** The content and views expressed here are solely those of the  
18  
19 authors and do not reflect those of the U.S. Federal Government. Dr. Lewinski reports  
20  
21 receiving funds from PhRMA Foundation and Otsuka. Hayden Bosworth reports  
22  
23 research funding through his institution from BeBetter therapeutics, Boehringer  
24  
25 Ingelheim, Improved Patient Outcomes, Merck, NHLBI, Novo Nordisk, Otsuka, Sanofi,  
26  
27 VA. He also provides consulting services for Abbott, Novartis, Sanofi, Vidya, Walmart,  
28  
29 Webmed. He is also on the board of directors of Preventric Diagnostics. Dr. Zullig  
30  
31 reports research funding awarded to her institution from the PhRMA Foundation and  
32  
33 Proteus Digital Health, as well as consulting for Pfizer and Novartis, all unrelated to the  
34  
35 current work.  
36  
37  
38  
39  
40

41 **Funding:** This work received funding from the VA Access Research Consortium (no  
42  
43 funding number given) and was supported by the Durham Center of Innovation to  
44  
45 Accelerate Discovery and Practice Transformation (ADAPT), (CIN 13-410) at the  
46  
47 Durham VA Health Care System. Dr. Lewinski was supported by VA HSR&D grants  
48  
49 #18-234, Drs. Shepherd-Banigan and Blalock by VA HSR&D Career Development  
50  
51 Award (CDA #17-006 and #19-035 respectively), and Dr. Walsh by VA OAA VA Quality  
52  
53 Scholars Fellowship Program (AF-3Q-05-2019-C).  
54  
55  
56  
57  
58  
59  
60

1  
2  
3 **Data sharing statement:** Reasonable requests for data will be responded to in  
4  
5 accordance to current Department of Veteran Affairs policy.  
6  
7

8 **Acknowledgements:** We would like to thank Dr. Gene Oddone for this early support of  
9  
10 this project. We would also like to thank the ADAPT TeleFAR workgroup, the Durham  
11  
12 Veteran Engagement Panel, and the Durham VA Health Care System Antiracism and  
13  
14 Black Equity Advisory Board for consultation during development of this project.  
15  
16 Additionally, we thank Eric Monson for data visualization consultation and Sharon  
17  
18 Thompson for editorial assistance.  
19  
20  
21

22 **Ethics Statement:** This work was reviewed and approved by the Durham VA  
23  
24 Institutional Review Board (#02312). All co-authors declare no conflicts of interest.  
25  
26  
27

## 28 **References**

- 29  
30 1. Elliott, T., et al., *Beyond Convenience: Patients' Perceptions of Physician*  
31 *Interactive Skills and Compassion via Telemedicine*. Mayo Clin Proc Innov  
32 Qual Outcomes, 2020. **4**(3): p. 305-314.
- 33  
34 2. Centers for Medicare & Medicaid Services. *Medicare Telemedicine Health Care*  
35 *Provider Fact Sheet*. 2021 March 17, 2020 [cited 2021 12/03/21]; Available from:  
36 [https://www.cms.gov/newsroom/fact-sheets/medicare-telemedicine-health-care-](https://www.cms.gov/newsroom/fact-sheets/medicare-telemedicine-health-care-provider-fact-sheet)  
37 [provider-fact-sheet](https://www.cms.gov/newsroom/fact-sheets/medicare-telemedicine-health-care-provider-fact-sheet).
- 38  
39 3. Lewinski, A.A., et al., *Accelerating Implementation of Virtual Care in an*  
40 *Integrated Health Care System: Future Research and Operations Priorities*. J  
41 Gen Intern Med, 2021.
- 42  
43 4. Pagán, V.M., K.S. McClung, and C.J. Peden, *An Observational Study of*  
44 *Disparities in Telemedicine Utilization in Primary Care Patients Before and*  
45 *During the COVID-19 Pandemic*. Telemed J E Health, 2021.
- 46  
47 5. Poeran, J., et al., *Pre-existing Disparities and Potential Implications for the Rapid*  
48 *Expansion of Telemedicine in Response to the Coronavirus Disease 2019*  
49 *Pandemic*. Med Care, 2021. **59**(8): p. 694-698.
- 50  
51 6. Lam, K., et al., *Assessing Telemedicine Unreadiness Among Older Adults in the*  
52 *United States During the COVID-19 Pandemic*. JAMA Intern Med, 2020. **180**(10):  
53 p. 1389-1391.
- 54  
55 7. Roberts, E.T. and A. Mehrotra, *Assessment of Disparities in Digital Access*  
56 *Among Medicare Beneficiaries and Implications for Telemedicine*. JAMA Intern  
57 Med, 2020. **180**(10): p. 1386-1389.

- 1
- 2
- 3
- 4
- 5
- 6
- 7
8. Ferguson, J.M., et al., *Virtual care expansion in the Veterans Health Administration during the COVID-19 pandemic: clinical services and patient characteristics associated with utilization*. J Am Med Inform Assoc, 2021. **28**(3): p. 453-462.
9. Luo, J., et al., *Telemedicine Adoption during the COVID-19 Pandemic: Gaps and Inequalities*. Appl Clin Inform, 2021. **12**(4): p. 836-844.
10. Rodriguez, J.A., et al., *Differences in the use of telephone and video telemedicine visits during the COVID-19 pandemic*. Am J Manag Care, 2021. **27**(1): p. 21-26.
11. Hilbert, M., *The end justifies the definition: The manifold outlooks on the digital divide and their practical usefulness for policy-making*. Telecommunications Policy, 2011. **35**(8): p. 715-736.
12. Pew Research Center. *Internet/Broadband Fact Sheet*. 2021 [cited 2021 12/03/21]; Available from: <https://www.pewresearch.org/internet/fact-sheet/internet-broadband/>.
13. Pierce, R.P. and J.J. Stevermer, *Disparities in use of telehealth at the onset of the COVID-19 public health emergency*. J Telemed Telecare, 2020: p. 1357633x20963893.
14. Tong, A., P. Sainsbury, and J. Craig, *Consolidated criteria for reporting qualitative research (COREQ): a 32-item checklist for interviews and focus groups*. Int J Qual Health Care, 2007. **19**(6): p. 349-57.
15. Fortney, J.C., et al., *A re-conceptualization of access for 21st century healthcare*. J Gen Intern Med, 2011. **26 Suppl 2**(Suppl 2): p. 639-47.
16. Department of Veteran Affairs. *Rural Veterans*. 2021 [cited 2021 12/03/21]; Available from: <https://www.ruralhealth.va.gov/aboutus/ruralvets.asp>.
17. Administration, V.H., *COVID-19 Response Plan*, O.o.E. Management, Editor. 2020.
18. Heher Y, ChenY., *Process Mapping: A Cornerstone of Quality Improvement, in Cancer Cytopathology*. 2017.
19. Lewinski, A.A., et al., *Applied Rapid Qualitative Analysis to Develop a Contextually Appropriate Intervention and Increase the Likelihood of Uptake*. Med Care, 2021. **59**(Suppl 3): p. S242-s251.
20. Lewinski, A.A., et al., *Veterans' Interpretation of Diabetes Distress in Diabetes Self-Management: Findings From Cognitive Interviews*. Sci Diabetes Self Manag Care, 2021. **47**(5): p. 391-403.
21. Nevedal, A.L., et al., *Rapid versus traditional qualitative analysis using the Consolidated Framework for Implementation Research (CFIR)*. Implement Sci, 2021. **16**(1): p. 67.
22. Patton, M., *Qualitative research & evaluation methods: Integrating theory and practice*. 2014: Sage Publications.
23. *Proposal for clinical algorithm standards*. Society for Medical Decision Making Committee on Standardization of Clinical Algorithms. Med Decis Making, 1992. **12**(2): p. 149-54.
24. Hausmann, L.R., et al., *Perceived racial discrimination in health care and its association with patients' healthcare experiences: does the measure matter?* Ethn Dis, 2010. **20**(1): p. 40-7.

- 1
  - 2
  - 3
  - 4
  - 5
  - 6
  - 7
  - 8
  - 9
  - 10
  - 11
  - 12
  - 13
  - 14
  - 15
  - 16
  - 17
  - 18
  - 19
  - 20
  - 21
  - 22
  - 23
  - 24
  - 25
  - 26
  - 27
  - 28
  - 29
  - 30
  - 31
  - 32
  - 33
  - 34
  - 35
  - 36
  - 37
  - 38
  - 39
  - 40
  - 41
  - 42
  - 43
  - 44
  - 45
  - 46
  - 47
  - 48
  - 49
  - 50
  - 51
  - 52
  - 53
  - 54
  - 55
  - 56
  - 57
  - 58
  - 59
  - 60
25. Williams, D.R., et al., *Racial Differences in Physical and Mental Health: Socio-economic Status, Stress and Discrimination*. J Health Psychol, 1997. **2**(3): p. 335-51.
26. Morgan, D.G., et al., *The telehealth satisfaction scale: reliability, validity, and satisfaction with telehealth in a rural memory clinic population*. Telemed J E Health, 2014. **20**(11): p. 997-1003.
27. Barkai, G., et al., *Patient and clinician experience with a rapidly implemented large-scale video consultation program during COVID-19*. Int J Qual Health Care, 2021. **33**(1).
28. Barsom, E.Z., et al., *Emergency upscaling of video consultation during the COVID-19 pandemic: Contrasting user experience with data insights from the electronic health record in a large academic hospital*. Int J Med Inform, 2021. **150**: p. 104463.
29. Heyworth, L., Kirsh, S., Zulman, D., Ferguson, J., Kizer, K. , *Expanding Access through Virtual Care: The VA's Early Experience with Covid-19*. N Engl J Med, 2020.
30. Croymans D, Hurst I., Han M, *Telehealth: The Right Care, at the Right Time, via the Right Medium*. NEJM, 2020.
31. Bhatt, A.B. *A Hybrid Model of In-person and Telemedicine Visits Facilitates Longitudinal Care Delivery*. 2021; June 6, 2022]; Available from: <https://advances.massgeneral.org/cardiovascular/article.aspx?id=1334>.
32. Victorian Government, *Telehealth Decision Tool*. 2020; June 6, 2022; Available from: <https://www.safercare.vic.gov.au/sites/default/files/2020-11/Telehealth%20decision%20tool.pdf>
33. Lopez, A.M., Lam K., & Thota, R., *Barriers and Facilitators to Telemedicine: Can You Hear Me Now?* Am Soc Clin Oncol Educ Book, 2021. **41**: p. 25-36.
34. Gordon, H.S., et al., *"I'm Not Feeling Like I'm Part of the Conversation" Patients' Perspectives on Communicating in Clinical Video Telehealth Visits*. J Gen Intern Med, 2020. **35**(6): p. 1751-1758.
35. Ramaswamy, A., et al., *Patient Satisfaction With Telemedicine During the COVID-19 Pandemic: Retrospective Cohort Study*. J Med Internet Res, 2020. **22**(9): p. e20786.
36. Gomez, T., et al., *A Qualitative Study of Primary Care Physicians' Experiences With Telemedicine During COVID-19*. J Am Board Fam Med, 2021. **34**(Suppl): p. S61-s70.
37. Srinivasan, M., et al., *Qualitative Assessment of Rapid System Transformation to Primary Care Video Visits at an Academic Medical Center*. Ann Intern Med, 2020. **173**(7): p. 527-535.
38. Presley C, H.A., Warnick J, *Diabetes SIG How to Prepare for your Telemedicine Appointment*. 2021.
39. Gerber, M.R., et al., *Trauma-Informed Telehealth in the COVID-19 Era and Beyond*. Fed Pract, 2020. **37**(7): p. 302-308.
40. Alkureishi, M.A., et al., *Clinician Perspectives on Telemedicine: Observational Cross-sectional Study*. JMIR Hum Factors, 2021. **8**(3): p. e29690.



**Patients  
Semi-structured Interviews**

**Purpose:**

- Obtain patient experiences and perceptions of video-based primary care
- Center data collection on patient population which has historically experienced systemic healthcare access barriers

**Participants**

Rural-dwelling, African-American veterans with at least one primary care visit in the last 12 months

**Questions guided by:**

Fortney conceptualization of access to care (e.g., perceived access to care, satisfaction with care)

**Overall goal:**

To develop an equitable, patient/clinician centered algorithm to optimize the use of video-visits in primary care

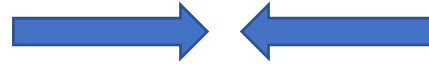

- Integration of findings from both samples with direct implications for when and how to incorporate video visits into primary care delivery
- Findings were organized across common themes and compared to identify ideal balance across patient/clinician perspectives of use of video visits.
- Development and iterative review of algorithm building on existing clinic workflows

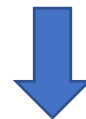

**Developed algorithm to support incorporation of video visits into primary care delivery**

**Primary Care Team  
Focus Groups**

**Purpose:**

- Obtain clinical team experiences and perceptions of delivery care via video-visits
- Solicit clinically appropriate role for and incorporation of video visits in primary care delivery

**Participants**

Multi-disciplinary primary care team members serving large rural population in the Southeastern US

**Questions guided by:**

Process map of existing workflow for video visits; Fortney conceptualization of access to care (e.g., digital connectivity, quality of interpersonal experience)

Patient seeking primary care clinical visit

Initiate Clinical Triage

- Does patient require urgent, in-person evaluation (eg, altered mental status, difficulty breathing, chest pain)?

Yes

Refer for emergent care

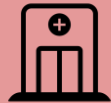

No

Consider Patient Factors

- Is patient new to clinic/provider?
- Does the patient have cognitive impairment?
- Does patient have sensory impairment (significant hearing loss or visual impairment)?

Yes

Schedule in-person visit

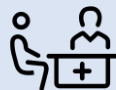

No

Continue Clinical Triage

- Is the patient's concern a chronic medical issue?
- Has the patient's concern been identified as appropriate for video-based evaluation (see inset box below)?

No

Schedule in-person visit

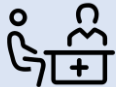

Yes

Assess video access and interest

- Is patient interested in conducting visit by video?
- Does patient have video-capable equipment?
- Does patient have access to high-speed internet or broadband?
- Does patient have access to location with auditory and visual privacy?

No

Schedule in-person visit

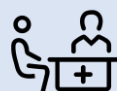

Yes

Assess need for technical assistance

- Has patient successfully completed a previous video-based visit on current platform?
- Does patient have family or friends that could assist with technology?

Yes

Schedule video visit

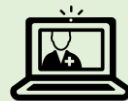

No

Schedule for video-based visit and encourage patient to conduct test video-visit call

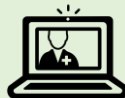

Examples of conditions likely appropriate for video-based care:

- Chronic diabetes or hypertension management
- New rash
- Single joint, non-traumatic pain
- Follow up from urgent care for low complexity issues



1  
2  
3  
4  
5  
6  
7  
8  
9  
10  
11  
12  
13  
14  
15  
16  
17  
18  
19  
20  
21  
22  
23  
24  
25  
26  
27  
28  
29  
30  
31  
32  
33  
34  
35  
36  
37  
38  
39  
40  
41  
42  
43  
44  
45  
46  
47



Appendix 1. Process Map of Pre-existing Primary Care Workflow for Incorporation of Video-based Care  
 Developed by CW building from experience with local quality improvement telehealth projects

For peer review only: <http://bmjopen.bmj.com/site/about/guidelines.xhtml>

## Standards for Reporting Qualitative Research (SRQR)\*

<http://www.equator-network.org/reporting-guidelines/srqr/>

Page/line no(s).

### Title and abstract

|                                                                                                                                                                                                                                                              |     |
|--------------------------------------------------------------------------------------------------------------------------------------------------------------------------------------------------------------------------------------------------------------|-----|
| <p><b>Title</b> - Concise description of the nature and topic of the study Identifying the study as qualitative or indicating the approach (e.g., ethnography, grounded theory) or data collection methods (e.g., interview, focus group) is recommended</p> | 1   |
| <p><b>Abstract</b> - Summary of key elements of the study using the abstract format of the intended publication; typically includes background, purpose, methods, results, and conclusions</p>                                                               | 2-3 |

### Introduction

|                                                                                                                                                                     |     |
|---------------------------------------------------------------------------------------------------------------------------------------------------------------------|-----|
| <p><b>Problem formulation</b> - Description and significance of the problem/phenomenon studied; review of relevant theory and empirical work; problem statement</p> | 4-5 |
| <p><b>Purpose or research question</b> - Purpose of the study and specific objectives or questions</p>                                                              | 5   |

### Methods

|                                                                                                                                                                                                                                                                                                                                                                                                             |     |
|-------------------------------------------------------------------------------------------------------------------------------------------------------------------------------------------------------------------------------------------------------------------------------------------------------------------------------------------------------------------------------------------------------------|-----|
| <p><b>Qualitative approach and research paradigm</b> - Qualitative approach (e.g., ethnography, grounded theory, case study, phenomenology, narrative research) and guiding theory if appropriate; identifying the research paradigm (e.g., postpositivist, constructivist/ interpretivist) is also recommended; rationale**</p>                                                                            | 5-7 |
| <p><b>Researcher characteristics and reflexivity</b> - Researchers' characteristics that may influence the research, including personal attributes, qualifications/experience, relationship with participants, assumptions, and/or presuppositions; potential or actual interaction between researchers' characteristics and the research questions, approach, methods, results, and/or transferability</p> | 6   |
| <p><b>Context</b> - Setting/site and salient contextual factors; rationale**</p>                                                                                                                                                                                                                                                                                                                            | 6   |
| <p><b>Sampling strategy</b> - How and why research participants, documents, or events were selected; criteria for deciding when no further sampling was necessary (e.g., sampling saturation); rationale**</p>                                                                                                                                                                                              | 6-7 |
| <p><b>Ethical issues pertaining to human subjects</b> - Documentation of approval by an appropriate ethics review board and participant consent, or explanation for lack thereof; other confidentiality and data security issues</p>                                                                                                                                                                        | 5   |
| <p><b>Data collection methods</b> - Types of data collected; details of data collection procedures including (as appropriate) start and stop dates of data collection and analysis, iterative process, triangulation of sources/methods, and modification of procedures in response to evolving study findings; rationale**</p>                                                                             | 6-7 |

|                       |                                                                                                                                                                                                                                                       |     |
|-----------------------|-------------------------------------------------------------------------------------------------------------------------------------------------------------------------------------------------------------------------------------------------------|-----|
| 1<br>2<br>3<br>4<br>5 | <b>Data collection instruments and technologies</b> - Description of instruments (e.g., interview guides, questionnaires) and devices (e.g., audio recorders) used for data collection; if/how the instrument(s) changed over the course of the study | 6-7 |
| 6<br>7<br>8           | <b>Units of study</b> - Number and relevant characteristics of participants, documents, or events included in the study; level of participation (could be reported in results)                                                                        | 6-7 |
| 9<br>10<br>11<br>12   | <b>Data processing</b> - Methods for processing data prior to and during analysis, including transcription, data entry, data management and security, verification of data integrity, data coding, and anonymization/de-identification of excerpts    | 6-8 |
| 13<br>14<br>15<br>16  | <b>Data analysis</b> - Process by which inferences, themes, etc., were identified and developed, including the researchers involved in data analysis; usually references a specific paradigm or approach; rationale**                                 | 6-8 |
| 17<br>18<br>19<br>20  | <b>Techniques to enhance trustworthiness</b> - Techniques to enhance trustworthiness and credibility of data analysis (e.g., member checking, audit trail, triangulation); rationale**                                                                | 5-7 |

### Results/findings

|                      |                                                                                                                                                                                                   |             |
|----------------------|---------------------------------------------------------------------------------------------------------------------------------------------------------------------------------------------------|-------------|
| 23<br>24<br>25<br>26 | <b>Synthesis and interpretation</b> - Main findings (e.g., interpretations, inferences, and themes); might include development of a theory or model, or integration with prior research or theory | 8-11        |
| 27<br>28<br>29       | <b>Links to empirical data</b> - Evidence (e.g., quotes, field notes, text excerpts, photographs) to substantiate analytic findings                                                               | Table 1 & 2 |

### Discussion

|                                  |                                                                                                                                                                                                                                                                                                                                                                                                             |       |
|----------------------------------|-------------------------------------------------------------------------------------------------------------------------------------------------------------------------------------------------------------------------------------------------------------------------------------------------------------------------------------------------------------------------------------------------------------|-------|
| 32<br>33<br>34<br>35<br>36<br>37 | <b>Integration with prior work, implications, transferability, and contribution(s) to the field</b> - Short summary of main findings; explanation of how findings and conclusions connect to, support, elaborate on, or challenge conclusions of earlier scholarship; discussion of scope of application/generalizability; identification of unique contribution(s) to scholarship in a discipline or field | 12-15 |
| 38<br>39                         | <b>Limitations</b> - Trustworthiness and limitations of findings                                                                                                                                                                                                                                                                                                                                            | 14    |

### Other

|                |                                                                                                                                               |   |
|----------------|-----------------------------------------------------------------------------------------------------------------------------------------------|---|
| 42<br>43<br>44 | <b>Conflicts of interest</b> - Potential sources of influence or perceived influence on study conduct and conclusions; how these were managed | 3 |
| 45<br>46       | <b>Funding</b> - Sources of funding and other support; role of funders in data collection, interpretation, and reporting                      | 3 |

\*The authors created the SRQR by searching the literature to identify guidelines, reporting standards, and critical appraisal criteria for qualitative research; reviewing the reference lists of retrieved sources; and contacting experts to gain feedback. The SRQR aims to improve the transparency of all aspects of qualitative research by providing clear standards for reporting qualitative research.

1  
2  
3  
4  
5  
6  
7  
8  
9  
10  
11  
12  
13  
14  
15  
16  
17  
18  
19  
20  
21  
22  
23  
24  
25  
26  
27  
28  
29  
30  
31  
32  
33  
34  
35  
36  
37  
38  
39  
40  
41  
42  
43  
44  
45  
46  
47  
48  
49  
50  
51  
52  
53  
54  
55  
56  
57  
58  
59  
60

\*\*The rationale should briefly discuss the justification for choosing that theory, approach, method, or technique rather than other options available, the assumptions and limitations implicit in those choices, and how those choices influence study conclusions and transferability. As appropriate, the rationale for several items might be discussed together.

**Reference:**

O'Brien BC, Harris IB, Beckman TJ, Reed DA, Cook DA. **Standards for reporting qualitative research: a synthesis of recommendations.** *Academic Medicine*, Vol. 89, No. 9 / Sept 2014  
DOI: 10.1097/ACM.0000000000000388

For peer review only
