# Supplementary material for: How can equitable video visit access be delivered in primary care? A qualitative study among rural primary care teams and patients
Source: PubMed Central journal article supplement — BMJ Open. 2022 Aug 4;12(8):e062261. doi: 10.1136/bmjopen-2022-062261 (PMC9361743; doi:10.1136/bmjopen-2022-062261), 2022-08-04
Supplement: bmjopen-2022-062261supp001.pdf [file bmjopen-2022-062261supp001.pdf]

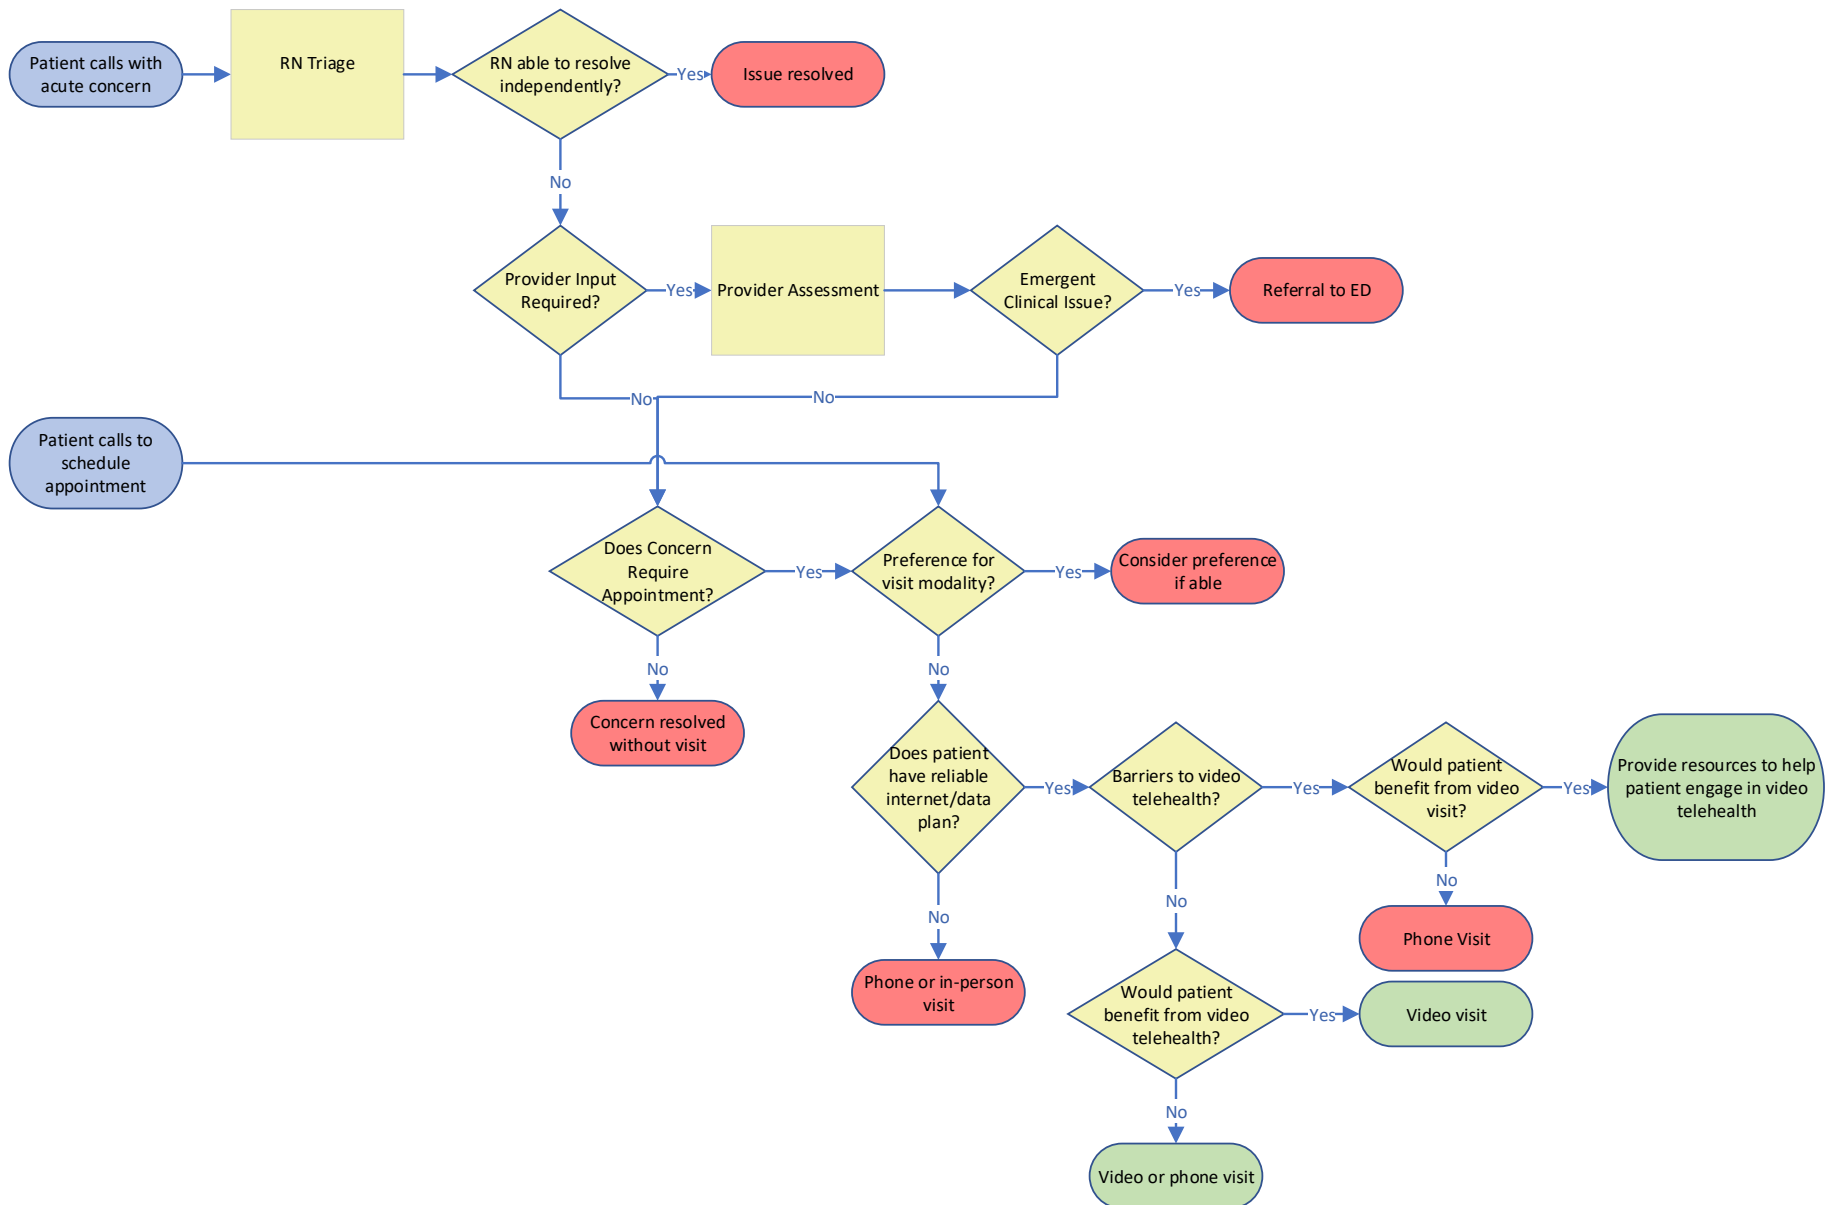

Appendix 1. Process Map of Pre-existing Primary Care Workflow for Incorporation of Video-based Care Developed by CW building from experience with local quality improvement telehealth projects
